# Supplementary material for: A population-based case-control study of hospitalisation due to head injuries among bicyclists and motorcyclists in Taiwan
Source: PubMed Central journal article supplement — BMJ Open. 2017 Nov 8;7(11):e018574. doi: 10.1136/bmjopen-2017-018574 (PMC5695412; doi:10.1136/bmjopen-2017-018574), 2017-11-08
Supplement: bmjopen-2017-018574.draft_revisions.pdf [file bmjopen-2017-018574.draft_revisions.pdf]

# BMJ Open

BMJ Open is committed to open peer review. As part of this commitment we make the peer review history of every article we publish publicly available.

When an article is published we post the peer reviewers' comments and the authors' responses online. We also post the versions of the paper that were used during peer review. These are the versions that the peer review comments apply to.

The versions of the paper that follow are the versions that were submitted during the peer review process. They are not the versions of record or the final published versions. They should not be cited or distributed as the published version of this manuscript.

BMJ Open is an open access journal and the full, final, typeset and author-corrected version of record of the manuscript is available on our site with no access controls, subscription charges or pay-per-view fees (<http://bmjopen.bmj.com>).

If you have any questions on BMJ Open's open peer review process please email [editorial.bmjopen@bmj.com](mailto:editorial.bmjopen@bmj.com)

# BMJ Open

## Comparison of head injury-related hospitalisation between bicyclists and motorcyclists in Taiwan

|                                 |                                                                                                                                                                                                                                                                                                                                                                                                                                             |
|---------------------------------|---------------------------------------------------------------------------------------------------------------------------------------------------------------------------------------------------------------------------------------------------------------------------------------------------------------------------------------------------------------------------------------------------------------------------------------------|
| Journal:                        | <i>BMJ Open</i>                                                                                                                                                                                                                                                                                                                                                                                                                             |
| Manuscript ID                   | bmjopen-2017-018574                                                                                                                                                                                                                                                                                                                                                                                                                         |
| Article Type:                   | Research                                                                                                                                                                                                                                                                                                                                                                                                                                    |
| Date Submitted by the Author:   | 07-Jul-2017                                                                                                                                                                                                                                                                                                                                                                                                                                 |
| Complete List of Authors:       | Pai, Chih-Wei; Taipei Medical University, College of Public Health , Graduate Institute of Injury Prevention and Control<br>Chen, Yi-Chu; Graduate Institute of Public Health, College of Public Health, Taipei Medical University<br>Lin, Hsiao-Yu; Taipei Medical University Hospital, Department of Urology<br>Chen, Ping-Ling; Taipei Medical University, College of Public Health, Graduate Institute of Injury Prevention and Control |
| <b>Primary Subject Heading</b>: | Public health                                                                                                                                                                                                                                                                                                                                                                                                                               |
| Secondary Subject Heading:      | Emergency medicine, Epidemiology                                                                                                                                                                                                                                                                                                                                                                                                            |
| Keywords:                       | ACCIDENT & EMERGENCY MEDICINE, PUBLIC HEALTH, TRAUMA MANAGEMENT                                                                                                                                                                                                                                                                                                                                                                             |
|                                 |                                                                                                                                                                                                                                                                                                                                                                                                                                             |

SCHOLARONE™  
Manuscripts

1  
2  
3  
4 **Comparison of head injury-related hospitalisation between bicyclists and**  
5  
6  
7 **motorcyclists in Taiwan**  
8  
9

10  
11  
12 Chih-Wei Pai<sup>a</sup>; Yi-Chu Chen<sup>b</sup>; Hsiao-Yu Lin<sup>c</sup>; Ping-Ling Chen<sup>a,\*</sup>  
13

14  
15 <sup>a</sup> Graduate Institute of Injury Prevention and Control, College of Public Health, Taipei  
16  
17  
18 Medical University. Taiwan ROC  
19

20  
21 <sup>b</sup> Graduate Institute of Public Health, College of Public Health, Taipei Medical  
22  
23  
24 University. Taiwan ROC  
25

26  
27 <sup>c</sup> Department of Urology, Taipei Medical University Hospital. Taiwan ROC  
28

29  
30 \* Corresponding author  
31

32  
33 Email: [plchen@tmu.edu.tw](mailto:plchen@tmu.edu.tw)  
34

35  
36 +886 02-27361661 ext.6582  
37

38  
39 Address: Graduate Institute of Injury Prevention and Control, College of Public  
40  
41  
42 Health, Taipei Medical University, 250 Wuxing St, Taipei City, Taiwan 110.  
43  
44

45  
46  
47 **Word count: 2966**  
48  
49  
50  
51  
52  
53  
54  
55  
56  
57  
58  
59  
60

## Abstract

## Introduction

According to official statistics in Taiwan, the main body region of injury causing bicyclist deaths was the head, and bicyclists were 2.6 times more likely to be fatally injured than motorcyclists were.

## Objectives

The current research aims to investigate the crash characteristics of hospitalised motorcyclists and cyclists with head injuries.

## Methods

Using linked data of the National Traffic Accident Dataset and the National Health Insurance Research Database, this study investigates the crash characteristics of bicyclist and motorcyclist casualties presented to hospitals due to motor vehicle crashes. Head injury-related hospitalisation was used as the study outcome for both road users to evaluate whether various factors (e.g. human attributes, road and weather conditions, and vehicle characteristics) are related to hospital admission of those who sustained serious injuries.

## Results

A total of 1239474 motorcyclist and cyclist casualties, the proportion of bicyclists hospitalised for head injuries was higher than that of motorcyclists (10.0% vs. 6.5%).

1  
2  
3  
4 However, the multiple logistic regression model shows that after the adjustment of  
5  
6  
7 this result for other factors such as helmet use, bicyclists were 18% significantly less  
8  
9  
10 likely to be hospitalised for head injuries than motorcyclists were (AOR=0.82;  
11  
12  
13 CI=0.79-0.85). Other important determinants of head-injury related hospitalisation for  
14  
15  
16 motorcyclists and cyclists include elderly riders, crashes that occurred in rural areas,  
17  
18  
19 moped riders, intoxicated motorcyclists and bicyclists, unlicensed motorcyclists, dusk  
20  
21  
22 and dawn conditions, and single-vehicle crashes.

### 23 24 **Conclusions**

25  
26  
27 Our finding underscores the importance of helmet use in reducing hospitalisation due  
28  
29  
30 to head injuries among bicyclists while current helmet use is relatively low.  
31  
32  
33  
34  
35

36 **Keywords:** Motorcyclist and bicyclist; Head injury; Hospitalisation; Crashes  
37  
38  
39  
40  
41  
42  
43  
44  
45  
46  
47  
48  
49  
50  
51  
52  
53  
54  
55  
56  
57  
58  
59  
60

## Article summary

### Strengths and limitations of this study

The Traffic Accident Dataset and the Health Insurance Research Database are both national datasets that cover 99.9% of populations. This is a comprehensive study using the linked data from these two datasets which facilitate the determination of various factors associated with an increased risk of hospitalisation for head injuries among motorcyclists and bicyclists in Taiwan.

The main limitation of the paper is the data that are not available from the A1A2 police accident dataset and the NHIRD, which would open up possibilities for additional analyses including motorcycle and bicycle types (a greater classification of engine size and electric bicycles and bikesharing programmes that have recently become popular), traffic volume, geometric characteristics, and electronic device use (e.g., phone and MP3 players). These factors may also have a role in injury outcomes and thus hospitalisation rates.

## Highlights

- Head injury-related hospitalisation among bicyclists and motorcyclists was investigated.
- The National Traffic Accident Dataset and the National Health Insurance Research Database were combined and analysed.
- Results show that the proportion of bicyclists hospitalised for head injuries was higher than that of motorcyclists (10.0% vs. 6.5%).
- The multiple logistic regression model shows that after adjusting other factors such as helmet use, bicyclists were 18% less likely to be hospitalised for head injuries than motorcyclists.
- Other important determinants of head-injury related hospitalization for motorcyclists and cyclists include elderly riders, crashes that occurred in rural areas, moped riders, intoxicated motorcyclists and bicyclists, unlicensed motorcyclists, dusk and dawn conditions, and single-vehicle crashes.

## Introduction

Two-wheel motor vehicle crashes involving motorcyclists and bicyclists have been a serious safety problem in Taiwan with regard to injury severity and frequency. Studies have suggested that head injuries are the primary cause of deaths and hospitalisation among motorcyclists and bicyclists<sup>1-3</sup>. A study reported that in Taiwan bicyclists were 2.6 times more likely to be fatally injured than motorcyclists were<sup>4</sup>. The head (approximately 61%) was the main body part that sustained injury resulting in death of these bicyclists<sup>5</sup>. Head injuries among motorcyclists have become less problematic since the enforcement of the helmet use law for motorcyclists in 1997<sup>6</sup>.

According to official accident statistics (Taiwan A1A2 national accident dataset), the number of motorcycle accidents has been steadily decreasing; however, the number of bicycle accidents has been stably increasing. This is primarily attributable to the increasing popularity of bicycle use. For instance, several bike sharing programmes have been implemented in several metropolitan cities such as Taipei City and Taichung City. In addition, the use of electric bicycles and racing bikes, which are widely used for recreational purposes and travelling between cities, has been increasing.

Studies conducted mainly in Asian countries on helmet use and motorcyclist



1  
2  
3  
4 injuries have reported that helmet use and related laws have successfully reduced head  
5  
6  
7 injuries, thus reducing fatalities among motorcyclists. Chiu et al. (2011) investigated  
8  
9  
10 motorcycle head injuries one year after the enforcement of the helmet use law in  
11  
12 Taiwan and reported a 33% reduction in head injuries<sup>6</sup>. Furthermore, Ichiwaka et al.  
13  
14 (2003) reported a 41% reduction in head injuries in Thailand 2 years after the  
15  
16 implementation of a mandatory helmet use law<sup>7</sup>. A similar reduction in head injuries  
17  
18 and fatalities has been reported in Malaysia<sup>8</sup>, Vietnam<sup>9</sup>, the United States<sup>3</sup>,  
19  
20 and Italy<sup>10</sup> after the implementation of helmet use laws.

21  
22  
23  
24  
25  
26  
27  
28  
29  
30  
31  
32  
33  
34  
35  
36  
37  
38  
39  
40  
41  
42  
43  
44  
45  
46  
47  
48  
49  
50  
51  
52  
53  
54  
55  
56  
57  
58  
59  
60  
Bicycle helmet use is a means of reducing morbidity and mortality among bike  
users. Several case-controlled studies have reported an association of helmet use with a  
decreased rate of head injury and mortality among riders of all ages, with bicycle  
helmets reducing the risk of head and brain injury by 65%-88%<sup>11</sup>. Moreover,  
Attewell et al. (2001)<sup>12</sup> conducted a meta-analysis of 16 observational studies and  
reported that bicycle helmets can significantly reduce the risks of head injury by  
approximately 60%.

Current efforts to increase helmet use in order to prevent head injuries in accidents  
include campaigns to increase awareness regarding the importance of helmet use,  
along with advocating helmet use laws. Over the last decades, mandatory bicycle  
helmet use laws have been implemented in several countries including Australia, New

1  
2  
3  
4 Zealand, Sweden, and Canada. A study indicated that helmet use laws act as a  
5  
6 deterrent to cycling<sup>13</sup>. Others studies have supported this decline in cycling<sup>14 15</sup>. In  
7  
8  
9  
10 general, a positive effect of mandatory cycle helmet use laws on bicyclist head  
11  
12 injuries has been observed in Australia<sup>16 17</sup>, Sweden<sup>18 19</sup>, and New Zealand<sup>20 21</sup>.

15  
16 When reviewed together, literature has suggested that helmet use and related laws  
17  
18 are beneficial for reducing head injuries and fatalities among motorcyclists and  
19  
20 bicyclists. Following the increasing popularity of bicycle use in recent years in  
21  
22 Taiwan, the number of bicycle accidents has steadily increased. In addition, the  
23  
24 implementation of several bike-sharing programmes in metropolitan cities such as  
25  
26 Taipei City and Taichuang City where bicycle helmets are not provided has presented  
27  
28 a safety concern among bicyclists.  
29  
30  
31  
32  
33  
34

35  
36 The main research objective of the current research was to investigate the crash  
37  
38 characteristics of hospitalised motorcyclists and cyclist casualties hospitalised  
39  
40 primarily due to head injuries. Hospitalisation for head injuries was considered the  
41  
42 study outcome for both road users to evaluate whether various factors such as human  
43  
44 attributes, road and weather conditions, and vehicle characteristics are related to  
45  
46 hospitalisation of patients with head injuries caused by MVCs. Hospitalisation for  
47  
48 head injuries was compared between bicyclists and motorcyclists. In addition, the  
49  
50 present paper separately examined factors affecting hospitalisation of motorcyclists  
51  
52  
53  
54  
55  
56  
57  
58  
59  
60

1  
2  
3  
4 and bicyclists primarily for head injuries.  
5  
6  
7  
8

## 9 10 **Materials and Methods**

### 11 12 13 14 15 *Data source*

16  
17  
18 Two datasets, police-reported crash data provided by the National Police Agency,  
19  
20  
21 Ministry of the Interior, and the National Health Insurance Research Database  
22  
23 (NHIRD) provided by the Health and Welfare Data Science Center, Ministry of  
24  
25 Health and Welfare, were used in the present study. The police-reported crash data  
26  
27 (abbreviated as A1A2) are recorded by trained police accident investigators after an  
28  
29 accident has been reported to police. The A1A2 report forms comprise the following  
30  
31 three files: accident, vehicle, and victim files. A thorough description of A1A2 can be  
32  
33 found in the study of Chen et al. (2016)<sup>22</sup>.  
34  
35  
36  
37  
38  
39  
40

41  
42 The Bureau of National Health Insurance (BNHI) in Taiwan implemented the  
43  
44 National Health Insurance (NHI) programme on 1 March, 1995, and the NHI covers  
45  
46 99% of the resident of Taiwan. The NHIRD comprises the outpatient and inpatient  
47  
48 claims data of all NHI beneficiaries, all hospitals and clinics are required to report to  
49  
50 the BNHI on a monthly basis. The information obtained from the NHIRD can be  
51  
52 considered complete and accurate<sup>23</sup> because the BNHI ensures the accuracy of claims  
53  
54  
55  
56  
57  
58  
59  
60

1  
2  
3  
4 files by performing periodical expert reviews on a random sample for every 50-100  
5  
6  
7 ambulatory and inpatient claims. The NHIRD contains data such as patients' age and  
8  
9  
10 gender, admission and discharge dates, care location, hospital level, treatment  
11  
12 department, surgical procedures, medical expenditures, diagnosis of disease or injury  
13  
14 (in accordance with International Classification of Diseases, Ninth Revision Clinical  
15  
16 Modification [ICD-9-CM] N-codes), and cause of injury (in accordance with  
17  
18 ICD-9-CM E-codes).  
19  
20  
21  
22  
23

24 Injury diagnoses are coded according to the ICD-9-CM N-codes 800 to 999. The  
25  
26 ICD-9-CM E-codes defining motorcycle or bicycle-related injuries are listed as  
27  
28 follows: E800.3, E801.3, E802.3, E803.3, E804.3, E805.3, E806.3, E807.3,  
29  
30 E810.x-E819.x, E820.6, E821.6, E822.6, E823.6, E824.6, E825.6, E826.1, E826.9,  
31  
32 E827.1, E828.1, and E829.1. The encrypted personal identification data in the NHIRD  
33  
34 were used to link externally the NHIRD dataset to the A1A2 dataset. Our study was  
35  
36 exempted from review by an institutional review board because the encryption of  
37  
38 patients' identification information makes it impossible to identify individual patients  
39  
40 or casualties (IRB #:201409033).  
41  
42  
43  
44  
45  
46  
47  
48  
49

50 The flow chart of sample selection from the A1A2 police dataset and the NHIRD  
51  
52 is presented in supplementary appendix 1. The current research examined data for the  
53  
54 period between 2003 and 2012. By linking the A1A2 crash data and the NHIRD, a  
55  
56  
57  
58  
59  
60

1  
2  
3  
4 total of 4054668 casualties involved in MVCs were identified. Among the 4054668  
5  
6  
7 casualties, 1998606 were motorcyclists and bicyclists involved in MVCs (after  
8  
9  
10 excluding missing data such as identification and sex data and remaining cases where  
11  
12 victims were treated at different times). After removal of the cases where the  
13  
14 individuals involved did not receive an injury diagnosis and where patients died  
15  
16 within 24 hours, a total of 1239474 casualties were either hospitalised or admitted to  
17  
18 emergency departments. Among these 1239474 casualties, 82711 were hospitalised  
19  
20 for head injuries (treated as cases), and 1156763 were hospitalised for other injury  
21  
22 types or received emergency treatment only (treated as controls).  
23  
24  
25  
26  
27  
28  
29  
30  
31  
32

### 33 *Variable definitions*

34  
35  
36 The current study investigates the effects of demographic variables, temporal  
37  
38 factors, road and environment characteristics, and crash factors on head injuries  
39  
40 among bicyclist and motorcyclist casualties. Demographic data were collected for the  
41  
42 casualties, namely gender (male and female); age (four groups: <18, 18-40, 41-64,  
43  
44 and 65 or above); marriage status (married, single, divorced, and others); blood  
45  
46 alcohol consumption (BAC) level (<0.03% or ≥0.03%); and helmet use (yes or no).  
47  
48  
49  
50  
51  
52  
53 Vehicle attributes were the engine size (50cc and 51cc or above) and crash partner  
54  
55 (bicycle, motorcycle, car or taxi, bus or coach, or heavy goods vehicle). The temporal  
56  
57  
58  
59  
60

1  
2  
3  
4 factor was the crash time (daytime or night time). Road and environment factors were  
5  
6  
7 the following variables: location (highly urbanised area, moderately urbanised area,  
8  
9 boomtown, rural area), path type (straight road, curved road, or crossroads or  
10  
11 roundabout), lighting (daylight, dusk, or dawn);road type (provincial highway, county  
12  
13 road, or others);road surface (dry, or wet or slippery);road defect (yes or no);barrier  
14  
15  
16 (yes or no);traffic signal (with or without signal);separation of traffic direction (yes or  
17  
18  
19 no);and traffic island (yes or no). Crash characteristics were the crash type  
20  
21  
22 (multiple-vehicle crash or single-vehicle crash) and object type which was divided  
23  
24  
25 into fixed objects and unfixe objects.  
26  
27  
28  
29  
30  
31  
32

### 33 *Statistical analysis*

34  
35  
36 Because the dependent variable is binary (hospitalisation for head injuries vs.  
37  
38 emergency treatment or hospitalisation for other injury types), a logistic regression  
39  
40 model was estimated to examine the determinants of hospitalisation for head injuries.  
41  
42  
43 A pooled logistic regression model was estimated: the first model of hospitalisation  
44  
45 for head injuries included casualty type (bicyclists vs. motorcyclists) as one of the  
46  
47 variables. Furthermore, two separate models were employed to examine the  
48  
49 determinants of hospitalisation for head injuries among bicyclists and motorcyclists.  
50  
51  
52  
53  
54  
55  
56 These two models determined contributory factors that may be different across  
57  
58  
59  
60

bicyclist and motorcyclist casualties.

## Results

We further illustrate the trend of head injuries sustained by motorcyclists and bicyclists who presented to the emergency rooms or were admitted to hospitals (see supplementary appendix 2). The trend of head injuries appeared to steadily decrease among these two groups: the percentage of head injuries decreased from 10.2% and 16.4% in 2003 to 4.7% and 7.8% in 2012 among motorcyclists and bicyclists, respectively. The decreasing trend was statistically significant according to the Mann-Kendall trend test ( $p < 0.01$ ). Moreover, the risk of sustaining head injuries tended to be higher among bicyclists than among motorcyclists.

Table 1 lists the N-codes for principal diagnoses of injuries to various body regions resulting in the hospitalisation of motorcyclists and bicyclists. Traumatic brain injury (TBI, 29.3%), lower leg and ankle fracture (12.3%), and shoulder and upper arm fracture (9.4%) were the top three injury types among motorcyclists. Furthermore, TBI (41.4%), lower leg and ankle fracture (10.7%), and forearm and elbow fracture (6.9%) were the top three injury types among bicyclists. The proportion of bicyclists diagnosed to sustain a TBI was higher than that of motorcyclists (41.4% vs. 29.3%).

Table 1: N-codes of principal diagnoses for injuries requiring hospitalization in two-wheeled vehicle crashes

| <u>Total</u>                             |       |      | <u>Motorcyclists</u>                     |       |      | <u>Bicyclists</u>                        |      |      |
|------------------------------------------|-------|------|------------------------------------------|-------|------|------------------------------------------|------|------|
| N-code                                   | N     | %    | N-code                                   | N     | %    | N-code                                   | N    | %    |
| Traumatic brain injury                   | 67464 | 30.0 | Traumatic brain injury                   | 61826 | 29.3 | Traumatic brain injury                   | 5638 | 41.4 |
| Lower leg and ankle fracture             | 27358 | 12.2 | Lower leg and ankle fracture             | 25908 | 12.3 | Lower leg and ankle fracture             | 1450 | 10.7 |
| Shoulder and upper arm fracture          | 20712 | 9.2  | Shoulder and upper arm fracture          | 19839 | 9.4  | Forearm and elbow fracture               | 939  | 6.9  |
| Forearm and elbow fracture               | 16782 | 7.5  | Forearm and elbow fracture               | 15843 | 7.5  | Shoulder and upper arm fracture          | 873  | 6.4  |
| Other head, face, and neck               | 15247 | 6.8  | Other head, face, and neck               | 14526 | 6.9  | Hip fracture                             | 743  | 5.5  |
| Upper leg and thigh fracture             | 10975 | 4.9  | Upper leg and thigh fracture             | 10528 | 5.0  | Other head, face, and neck               | 721  | 5.3  |
| Sternum/ribs/pelvis fracture             | 10888 | 4.8  | Sternum/ribs/pelvis fracture             | 10509 | 5.0  | Spinal fractures                         | 620  | 4.6  |
| Minor injuries: contusions and abrasions | 8640  | 3.8  | Minor injuries: contusions and abrasions | 8160  | 3.9  | Minor injuries: contusions and abrasions | 480  | 3.5  |
| Minor injuries: open wounds              | 7807  | 3.5  | Minor injuries: open wounds              | 7501  | 3.6  | Sternum/ribs/pelvis fracture             | 466  | 3.4  |
| Wrist/hand/finger fracture               | 6411  | 2.9  | Wrist/hand/finger fracture               | 6213  | 2.9  | Upper leg and thigh fracture             | 360  | 2.6  |



1  
2  
3  
4  
5  
6  
7 Tables 2-4 summarise the human attributes, environmental factors, and vehicle  
8  
9 characteristics of two-wheeler casualties with head injuries occurring between 2003  
10  
11 and 2012. One of the noteworthy results includes that the proportion of bicyclists  
12  
13 hospitalised for head injuries was higher than that of motorcyclists (10.0% vs. 6.5%).  
14  
15  
16  
17  
18 Other noteworthy results from Tables 2-4 are not interpreted here for brevity.  
19  
20  
21  
22  
23  
24  
25  
26  
27  
28  
29  
30  
31  
32  
33  
34  
35  
36  
37  
38  
39  
40  
41  
42  
43  
44  
45  
46  
47  
48  
49  
50  
51  
52  
53  
54  
55  
56  
57  
58  
59  
60

Table 2: Characteristics of inpatients with head injury involved in two-wheeled vehicle crashes

|                            | Two-wheeled vehicles |      |          |      |          | Motorcyclists |      |          |      |          | Bicyclists |      |          |      |          |
|----------------------------|----------------------|------|----------|------|----------|---------------|------|----------|------|----------|------------|------|----------|------|----------|
|                            | Cases                |      | Controls |      | <i>p</i> | Cases         |      | Controls |      | <i>p</i> | Cases      |      | Controls |      | <i>p</i> |
|                            | n                    | %    | n        | %    |          | n             | %    | n        | %    |          | n          | %    | n        | %    |          |
| Total                      | 82711                | 6.7  | 1156763  | 93.3 |          | 76352         | 6.5  | 1099277  | 93.5 |          | 6359       | 10.0 | 57486    | 90.0 | <0.001   |
| Gender                     |                      |      |          |      |          |               |      |          |      |          |            |      |          |      |          |
| Male                       | 48373                | 7.1  | 634478   | 92.9 | <0.001   | 44706         | 6.9  | 601593   | 93.1 | <0.001   | 3667       | 10.0 | 32885    | 90.0 | 0.523    |
| Female                     | 34338                | 6.2  | 522285   | 93.8 |          | 31646         | 6.0  | 497684   | 94.0 |          | 2692       | 9.9  | 24601    | 90.1 |          |
| Age group (years)          |                      |      |          |      |          |               |      |          |      |          |            |      |          |      |          |
| <18                        | 5123                 | 9.4  | 49354    | 90.6 | <0.001   | 3718          | 10.5 | 31846    | 89.5 | <0.001   | 1405       | 7.4  | 17508    | 92.6 | <0.001   |
| 18-40                      | 38471                | 5.2  | 697198   | 94.8 |          | 37955         | 5.2  | 689948   | 94.8 |          | 516        | 6.6  | 7250     | 93.4 |          |
| 41-64                      | 26380                | 7.9  | 307322   | 92.1 |          | 24659         | 7.8  | 291586   | 92.2 |          | 1721       | 9.9  | 15736    | 90.1 |          |
| 65+                        | 12737                | 11.0 | 102860   | 89.0 |          | 10020         | 10.4 | 85874    | 89.6 |          | 2717       | 13.8 | 16986    | 86.2 |          |
| Marriage                   |                      |      |          |      |          |               |      |          |      |          |            |      |          |      |          |
| Married                    | 35429                | 7.7  | 425165   | 92.3 | <0.001   | 32446         | 7.5  | 402059   | 92.5 | <0.001   | 2983       | 11.4 | 23106    | 88.6 | <0.001   |
| Single/divorced/others     | 46382                | 6.1  | 718566   | 93.9 |          | 43159         | 5.9  | 685940   | 94.1 |          | 3223       | 9.0  | 32626    | 91.0 |          |
| Location                   |                      |      |          |      |          |               |      |          |      |          |            |      |          |      |          |
| Highly urbanised area      | 8815                 | 3.6  | 237868   | 96.4 | <0.001   | 8218          | 3.5  | 227548   | 96.5 | <0.001   | 597        | 5.5  | 10320    | 94.5 | <0.001   |
| Medium urbanised area      | 23379                | 5.5  | 401279   | 94.5 |          | 21743         | 5.4  | 383541   | 94.6 |          | 1636       | 8.4  | 17738    | 91.6 |          |
| Boomtown                   | 20149                | 7.0  | 268552   | 93.0 |          | 18709         | 6.8  | 255449   | 93.2 |          | 1440       | 9.9  | 13103    | 90.1 |          |
| General township           | 18924                | 9.8  | 174893   | 90.2 |          | 17251         | 9.5  | 163844   | 90.5 |          | 1673       | 13.2 | 11049    | 86.8 |          |
| Rural area                 | 11444                | 13.4 | 73818    | 86.6 |          | 10431         | 13.2 | 68556    | 86.8 |          | 1013       | 16.1 | 5262     | 83.9 |          |
| Motorcycle engine capacity |                      |      |          |      |          |               |      |          |      |          |            |      |          |      |          |
| ≥51cc                      | 60411                | 6.2  | 907379   | 93.8 | <0.001   | 60411         | 6.2  | 907379   | 93.8 | <0.001   | NA         | NA   | NA       | NA   | NA       |
| ≤50cc                      | 15941                | 7.7  | 191898   | 92.3 |          | 15941         | 7.7  | 191898   | 92.3 |          | NA         | NA   | NA       | NA   |          |

1  
2  
3  
4  
5  
6  
7  
8  
9  
10  
11  
12  
13  
14  
15  
16  
17  
18  
19  
20  
21  
22  
23  
24  
25  
26  
27  
28  
29  
30  
31  
32  
33  
34  
35  
36  
37  
38  
39  
40  
41  
42  
43  
44  
45  
46  
47  
48  
49

Drunk Driving

|                               |       |      |         |      |        |       |      |         |      |        |      |      |       |      |        |
|-------------------------------|-------|------|---------|------|--------|-------|------|---------|------|--------|------|------|-------|------|--------|
| No (BAC <sup>a</sup> ≤0.03%)  | 71070 | 6.0  | 1108293 | 94.0 | <0.001 | 64876 | 5.8  | 1051700 | 94.2 | <0.001 | 6194 | 9.9  | 56593 | 90.1 | <0.001 |
| Yes (BAC <sup>a</sup> >0.03%) | 11641 | 19.4 | 48470   | 80.6 |        | 11476 | 19.4 | 47577   | 80.6 |        | 165  | 15.6 | 893   | 84.4 |        |

Helmet use

|     |       |      |         |      |        |       |      |         |      |        |      |      |       |      |        |
|-----|-------|------|---------|------|--------|-------|------|---------|------|--------|------|------|-------|------|--------|
| Yes | 63575 | 5.9  | 1011701 | 94.1 | <0.001 | 63158 | 5.9  | 1006568 | 94.1 | <0.001 | 417  | 7.5  | 5133  | 92.5 | <0.001 |
| No  | 19136 | 11.7 | 145062  | 88.3 |        | 13194 | 12.5 | 92709   | 87.5 |        | 5942 | 10.2 | 52353 | 89.8 |        |

License

|     |       |      |        |      |        |       |      |        |      |        |    |    |    |    |    |
|-----|-------|------|--------|------|--------|-------|------|--------|------|--------|----|----|----|----|----|
| Yes | 57613 | 5.7  | 952109 | 94.3 | <0.001 | 57613 | 5.7  | 952109 | 94.3 | <0.001 | NA | NA | NA | NA | NA |
| No  | 16028 | 11.0 | 129169 | 89.0 |        | 16028 | 11.0 | 129169 | 89.0 |        | NA | NA | NA | NA |    |

<sup>a</sup>BAC: Blood alcohol concentration

For peer review only

Table 3. Environment characteristics of inpatients with head injury involved in two-wheeled vehicle crashes

|                                        | Two-wheeled vehicles |      |          |      |          | Motorcyclists |      |          |      |          | Bicyclists |      |          |      |          |
|----------------------------------------|----------------------|------|----------|------|----------|---------------|------|----------|------|----------|------------|------|----------|------|----------|
|                                        | Cases                |      | Controls |      | <i>p</i> | Cases         |      | Controls |      | <i>p</i> | Cases      |      | Controls |      | <i>p</i> |
|                                        | n                    | %    | n        | %    |          | n             | %    | n        | %    |          | n          | %    | n        | %    |          |
| Path Type                              |                      |      |          |      |          |               |      |          |      |          |            |      |          |      |          |
| Straight road                          | 34581                | 7.9  | 404337   | 92.1 | <0.001   | 31629         | 7.7  | 379675   | 92.3 | <0.001   | 2952       | 10.7 | 24662    | 89.3 | <0.001   |
| Curved road                            | 4344                 | 9.1  | 43312    | 90.9 |          | 4031          | 9.0  | 40950    | 91.0 |          | 313        | 11.7 | 2362     | 88.3 |          |
| Crossroads/Roundabout                  | 43786                | 5.8  | 709114   | 94.2 |          | 40692         | 5.7  | 678652   | 94.3 |          | 3094       | 9.2  | 30462    | 90.8 |          |
| Lighting                               |                      |      |          |      |          |               |      |          |      |          |            |      |          |      |          |
| Daylight                               | 79618                | 6.6  | 1131762  | 93.4 | <0.001   | 73593         | 6.4  | 1076250  | 93.6 | <0.001   | 6025       | 9.8  | 55512    | 90.2 | <0.001   |
| Dusk or dawn                           | 3093                 | 11.0 | 25001    | 89.0 |          | 2759          | 10.7 | 23027    | 89.3 |          | 334        | 14.5 | 1974     | 85.5 |          |
| Road type                              |                      |      |          |      |          |               |      |          |      |          |            |      |          |      |          |
| Provincial Highway                     | 7368                 | 10.5 | 62628    | 89.5 | <0.001   | 6833          | 10.3 | 59461    | 89.7 | <0.001   | 535        | 14.5 | 3167     | 85.5 | <0.001   |
| County road                            | 8923                 | 9.6  | 84422    | 90.4 |          | 8185          | 9.3  | 80043    | 90.7 |          | 738        | 14.4 | 4379     | 85.6 |          |
| Others(Township road/<br>Private road) | 66404                | 6.2  | 1009614  | 93.8 |          | 61318         | 6.0  | 959677   | 94.0 |          | 5086       | 9.2  | 49937    | 90.8 |          |
| Road surface                           |                      |      |          |      |          |               |      |          |      |          |            |      |          |      |          |
| Dry                                    | 74774                | 6.8  | 1024947  | 93.2 | <0.001   | 69030         | 6.6  | 973197   | 93.4 | <0.001   | 5744       | 10.0 | 51750    | 90.0 | 0.482    |
| Wet/Slippery                           | 7937                 | 5.7  | 131816   | 94.3 |          | 7322          | 5.5  | 126080   | 94.5 |          | 615        | 9.7  | 5736     | 90.3 |          |
| Road defect                            |                      |      |          |      |          |               |      |          |      |          |            |      |          |      |          |
| No                                     | 81560                | 6.7  | 1144635  | 93.3 | <0.001   | 75251         | 6.5  | 1087538  | 93.5 | <0.001   | 6309       | 10.0 | 57097    | 90.0 | 0.367    |
| Yes                                    | 1151                 | 8.7  | 12128    | 91.3 |          | 1101          | 8.6  | 11739    | 91.4 |          | 50         | 11.4 | 389      | 88.6 |          |
| Barrier                                |                      |      |          |      |          |               |      |          |      |          |            |      |          |      |          |
| No                                     | 79862                | 6.7  | 1120926  | 93.3 | <0.001   | 73658         | 6.5  | 1065006  | 93.5 | <0.001   | 6204       | 10.0 | 55920    | 90.0 | 0.224    |
| Yes                                    | 2849                 | 7.4  | 35837    | 92.6 |          | 2694          | 7.3  | 34271    | 92.7 |          | 155        | 9.0  | 1566     | 91.0 |          |

1  
2  
3  
4  
5  
6  
7  
8  
9  
10  
11  
12  
13  
14  
15  
16  
17  
18  
19  
20  
21  
22  
23  
24  
25  
26  
27  
28  
29  
30  
31  
32  
33  
34  
35  
36  
37  
38  
39  
40  
41  
42  
43  
44  
45  
46  
47  
48  
49

|                                  |       |     |        |      |        |       |     |        |      |        |      |      |       |      |        |
|----------------------------------|-------|-----|--------|------|--------|-------|-----|--------|------|--------|------|------|-------|------|--------|
| Traffic signal                   |       |     |        |      |        |       |     |        |      |        |      |      |       |      |        |
| Yes                              | 25993 | 5.7 | 434048 | 94.3 | <0.001 | 24265 | 5.5 | 417304 | 94.5 | <0.001 | 1728 | 9.4  | 16744 | 90.6 | 0.003  |
| No                               | 56718 | 7.3 | 722715 | 92.7 |        | 52087 | 7.1 | 681973 | 92.9 |        | 4631 | 10.2 | 40742 | 89.8 |        |
| Separation of traffic directions |       |     |        |      |        |       |     |        |      |        |      |      |       |      |        |
| Yes                              | 48122 | 6.9 | 648417 | 93.1 | <0.001 | 44113 | 6.7 | 613461 | 93.3 | <0.001 | 4009 | 10.3 | 34956 | 89.7 | 0.002  |
| No                               | 34589 | 6.4 | 508346 | 93.6 |        | 32239 | 6.2 | 485816 | 93.8 |        | 2350 | 9.4  | 22530 | 90.6 |        |
| Traffic island                   |       |     |        |      |        |       |     |        |      |        |      |      |       |      |        |
| Yes                              | 25552 | 7.6 | 309424 | 92.4 | <0.001 | 23531 | 7.4 | 293206 | 92.6 | <0.001 | 2021 | 11.1 | 16218 | 88.9 | <0.001 |
| No                               | 57159 | 6.3 | 847339 | 93.7 |        | 52821 | 6.1 | 806071 | 93.9 |        | 4338 | 9.5  | 41268 | 90.5 |        |

Table 4. Crash characteristics of inpatients with head injury involved in two-wheeled vehicle crashes

|                            | Two-wheeled vehicles |      |          |      |          | Motorcyclists |      |          |      |          | Bicyclists |      |          |      |          |
|----------------------------|----------------------|------|----------|------|----------|---------------|------|----------|------|----------|------------|------|----------|------|----------|
|                            | Cases                |      | Controls |      | <i>p</i> | Cases         |      | Controls |      | <i>p</i> | Cases      |      | Controls |      | <i>p</i> |
|                            | n                    | %    | n        | %    |          | n             | %    | n        | %    |          | n          | %    | n        | %    |          |
| Crash type                 |                      |      |          |      |          |               |      |          |      |          |            |      |          |      |          |
| Multiple vehicle           | 66457                | 6.0  | 1047128  | 94.0 | <0.001   | 60466         | 5.7  | 991673   | 94.3 | <0.001   | 5991       | 9.8  | 5981.2   | 90.2 | <0.001   |
| Single vehicle             | 16245                | 12.9 | 109635   | 87.1 |          | 15877         | 12.9 | 107604   | 87.1 |          | 368        | 15.3 | 352.7    | 84.7 |          |
| Object type                |                      |      |          |      |          |               |      |          |      |          |            |      |          |      |          |
| Unfixed objects            | 10829                | 11.3 | 84984    | 88.7 | <0.001   | 10542         | 11.2 | 83360    | 88.8 | <0.001   | 287        | 15   | 272      | 85.0 | 0.461    |
| Fixed objects              | 5416                 | 18.0 | 24651    | 82.0 |          | 5335          | 18.0 | 24244    | 82.0 |          | 81         | 16.6 | 64.4     | 83.4 |          |
| Fixed objects              |                      |      |          |      |          |               |      |          |      |          |            |      |          |      |          |
| Buildings/Barriers         | 1574                 | 14.4 | 9381     | 85.6 | <0.001   | 1518          | 14.3 | 9072     | 85.7 | <0.001   | 56         | 15.3 | 40.7     | 84.7 | 0.282    |
| Traffic                    | 3842                 | 20.1 | 15270    | 79.9 |          | 3817          | 20.1 | 15172    | 79.9 |          | 25         | 20.3 | 4.7      | 79.7 |          |
| islands/Trees/Poles/Others |                      |      |          |      |          |               |      |          |      |          |            |      |          |      |          |
| Unfixed objects            |                      |      |          |      |          |               |      |          |      |          |            |      |          |      |          |
| Animals/Pedestrians        | 2242                 | 7.1  | 29369    | 92.9 | <0.001   | 2230          | 7.1  | 29134    | 92.9 | <0.001   | 12         | 4.9  | 7.1      | 95.1 | <0.001   |
| Skidding vehicle           | 8587                 | 13.4 | 55615    | 86.6 |          | 8312          | 13.3 | 54226    | 86.7 |          | 275        | 16.5 | 258.5    | 83.5 |          |

1  
2  
3  
4  
5  
6  
7 Table 5 lists the crude and adjusted odds ratios (ORs) of hospitalisation for head  
8  
9 injuries among motorcyclists and bicyclists using logistic regression models. Three  
10  
11 models were estimated: a pooled model that considered the variable “vehicle type” as  
12  
13 a risk factor and two separate models for motorcyclists and bicyclists. According to  
14  
15 the variance inflation factor being  $<3$ , there was no need to be concerned about  
16  
17  
18  
19  
20  
21 multi-collinearity in the models.  
22  
23  
24  
25  
26  
27  
28  
29  
30  
31  
32  
33  
34  
35  
36  
37  
38  
39  
40  
41  
42  
43  
44  
45  
46  
47  
48  
49  
50  
51  
52  
53  
54  
55  
56  
57  
58  
59  
60

Table 5. Crude and adjusted odds ratios of hospitalization for head injury in two-wheeled vehicle crashed accidents

|                            | Two-wheeled vehicles |             |             |             | Motorcyclists |             |             |             | Bicyclist   |             |             |             |
|----------------------------|----------------------|-------------|-------------|-------------|---------------|-------------|-------------|-------------|-------------|-------------|-------------|-------------|
|                            | Crude OR             | 95% CI      | Adjusted OR | 95% CI      | Crude OR      | 95% CI      | Adjusted OR | 95% CI      | Crude OR    | 95% CI      | Adjusted OR | 95% CI      |
| Vehicle type               |                      |             |             |             |               |             |             |             |             |             |             |             |
| Motorcycle                 | 1.00 (ref.)          |             | 1.00 (ref.) |             | ---           |             | ---         |             | ---         |             | ---         |             |
| Bicycle                    | 1.59                 | 1.55 - 1.64 | 0.82        | 0.79 - 0.85 |               |             |             |             |             |             |             |             |
| Gender                     |                      |             |             |             |               |             |             |             |             |             |             |             |
| Male                       | 1.00 (ref.)          |             | 1.00 (ref.) |             | 1.00 (ref.)   |             | 1.00 (ref.) |             | 1.00 (ref.) |             | 1.00 (ref.) |             |
| Female                     | 0.86                 | 0.85 - 0.88 | 1.08        | 1.07 - 1.10 | 0.86          | 0.84 - 0.87 | 1.03        | 1.02 - 1.05 | 0.98        | 0.93 - 1.03 | 1.01        | 0.95 - 1.06 |
| Age(year)                  |                      |             |             |             |               |             |             |             |             |             |             |             |
| <18                        | 0.57                 | 0.57 - 0.58 | 0.62        | 0.60 - 0.64 | 0.59          | 0.58 - 0.60 | 0.71        | 0.68 - 0.74 | 0.61        | 0.56 - 0.67 | 0.86        | 0.77 - 0.96 |
| 18-40                      | 1.00 (ref.)          |             | 1.00 (ref.) |             | 1.00 (ref.)   |             | 1.00 (ref.) |             | 1.00 (ref.) |             | 1.00 (ref.) |             |
| 41-64                      | 1.29                 | 1.28 - 1.31 | 0.86        | 0.83 - 0.89 | 1.32          | 1.30 - 1.34 | 0.93        | 0.89 - 0.97 | 0.98        | 0.93 - 1.04 | 1.40        | 1.29 - 1.51 |
| 65+                        | 1.87                 | 1.83 - 1.90 | 1.23        | 1.19 - 1.28 | 1.78          | 1.74 - 1.82 | 1.23        | 1.18 - 1.29 | 1.78        | 1.69 - 1.88 | 1.92        | 1.80 - 2.06 |
| Location                   |                      |             |             |             |               |             |             |             |             |             |             |             |
| Highly urbanised area      | 1.00 (ref.)          |             | 1.00 (ref.) |             | 1.00 (ref.)   |             | 1.00 (ref.) |             | 1.00 (ref.) |             | 1.00 (ref.) |             |
| Medium urbanised area      | 0.74                 | 0.73 - 0.75 | 1.49        | 1.45 - 1.53 | 0.74          | 0.73 - 0.76 | 1.51        | 1.47 - 1.55 | 0.78        | 0.73 - 0.82 | 1.60        | 1.45 - 1.76 |
| Boomtown                   | 1.07                 | 1.05 - 1.08 | 1.78        | 1.73 - 1.83 | 1.07          | 1.05 - 1.09 | 1.81        | 1.76 - 1.86 | 0.99        | 0.93 - 1.06 | 1.89        | 1.70 - 2.09 |
| General township           | 1.67                 | 1.64 - 1.70 | 2.31        | 2.25 - 2.38 | 1.67          | 1.64 - 1.70 | 2.37        | 2.30 - 2.44 | 1.50        | 1.41 - 1.59 | 2.42        | 2.18 - 2.68 |
| Rural area                 | 2.36                 | 2.31 - 2.41 | 2.74        | 2.66 - 2.83 | 2.38          | 2.33 - 2.43 | 2.77        | 2.68 - 2.87 | 1.88        | 1.75 - 2.02 | 2.94        | 2.63 - 3.29 |
| Motorcycle engine capacity |                      |             |             |             |               |             |             |             |             |             |             |             |
| ≥51cc                      | ---                  |             | ---         |             | 1.00 (ref.)   |             | 1.00 (ref.) |             | ---         |             | ---         |             |
| ≤50cc                      |                      |             |             |             | 1.25          | 1.23 - 1.27 | 1.18        | 1.15 - 1.20 |             |             |             |             |



|                                     | Two-wheeled vehicles |             |             |             | Motorcyclists |             |             |             | Bicyclist   |             |             |             |
|-------------------------------------|----------------------|-------------|-------------|-------------|---------------|-------------|-------------|-------------|-------------|-------------|-------------|-------------|
|                                     | Crude OR             | 95% CI      | Adjusted OR | 95% CI      | Crude OR      | 95% CI      | Adjusted OR | 95% CI      | Crude OR    | 95% CI      | Adjusted OR | 95% CI      |
| Drunk driving                       |                      |             |             |             |               |             |             |             |             |             |             |             |
| No (BAC <sup>a</sup> ≤0.03%)        | 1.00 (ref.)          |             | 1.00 (ref.) |             | 1.00 (ref.)   |             | 1.00 (ref.) |             | 1.00 (ref.) |             | 1.00 (ref.) |             |
| Yes (BAC <sup>a</sup> >0.03%)       | 3.75                 | 3.67 - 3.83 | 2.80        | 2.73 - 2.87 | 3.91          | 3.83 - 4.00 | 2.64        | 2.58 - 2.71 | 1.69        | 1.43 - 2.00 | 1.47        | 1.23 - 1.75 |
| Helmet use                          |                      |             |             |             |               |             |             |             |             |             |             |             |
| Yes                                 | 1.00 (ref.)          |             | 1.00 (ref.) |             | 1.00 (ref.)   |             | 1.00 (ref.) |             | 1.00 (ref.) |             | 1.00 (ref.) |             |
| No                                  | 2.10                 | 2.06 - 2.14 | 1.77        | 1.74 - 1.81 | 2.27          | 2.22 - 2.31 | 1.73        | 1.69 - 1.77 | 1.40        | 1.26 - 1.55 | 1.24        | 1.12 - 1.38 |
| License                             |                      |             |             |             |               |             |             |             |             |             |             |             |
| Yes                                 | ---                  |             | ---         |             | 1.00 (ref.)   |             | 1.00 (ref.) |             | ---         |             | ---         |             |
| No                                  |                      |             |             |             | 2.05          | 2.01 - 2.09 | 1.36        | 1.33 - 1.39 |             |             |             |             |
| Path type                           |                      |             |             |             |               |             |             |             |             |             |             |             |
| Straight road                       | 1.00 (ref.)          |             | 1.00 (ref.) |             | 1.00 (ref.)   |             | 1.00 (ref.) |             | 1.00 (ref.) |             | 1.00 (ref.) |             |
| Curved road                         | 1.43                 | 1.38 - 1.47 | 1.01        | 0.98 - 1.05 | 1.44          | 1.39 - 1.49 | 1.00        | 0.96 - 1.03 | 1.21        | 1.07 - 1.36 | 1.16        | 1.03 - 1.32 |
| Crossroads/Roundabout               | 0.71                 | 0.70 - 0.72 | 0.90        | 0.88 - 0.92 | 0.71          | 0.70 - 0.72 | 0.90        | 0.88 - 0.92 | 0.84        | 0.80 - 0.89 | 0.94        | 0.87 - 1.00 |
| Lighting                            |                      |             |             |             |               |             |             |             |             |             |             |             |
| Daylight                            | 1.00 (ref.)          |             | 1.00 (ref.) |             | 1.00 (ref.)   |             | 1.00 (ref.) |             | 1.00 (ref.) |             | 1.00 (ref.) |             |
| Dusk or dawn                        | 1.76                 | 1.69 - 1.83 | 1.08        | 1.03 - 1.12 | 1.75          | 1.68 - 1.82 | 1.05        | 1.00 - 1.09 | 1.56        | 1.38 - 1.76 | 1.28        | 1.13 - 1.45 |
| Road type                           |                      |             |             |             |               |             |             |             |             |             |             |             |
| Provincial highway                  | 1.00 (ref.)          |             | 1.00 (ref.) |             | 1.00 (ref.)   |             | 1.00 (ref.) |             | 1.00 (ref.) |             | 1.00 (ref.) |             |
| County road                         | 1.54                 | 1.50 - 1.57 | 0.98        | 0.94 - 1.01 | 1.53          | 1.49 - 1.57 | 0.97        | 0.93 - 1.00 | 1.59        | 1.47 - 1.73 | 1.06        | 0.94 - 1.20 |
| Others (Township road/Private road) | 0.59                 | 0.58 - 0.60 | 0.83        | 0.81 - 0.85 | 0.59          | 0.58 - 0.61 | 0.82        | 0.80 - 0.85 | 0.60        | 0.57 - 0.65 | 0.85        | 0.77 - 0.94 |
| Road surface                        |                      |             |             |             |               |             |             |             |             |             |             |             |

|                                  | Two-wheeled vehicles |             |             |             | Motorcyclists |             |             |             | Bicyclist   |             |             |             |
|----------------------------------|----------------------|-------------|-------------|-------------|---------------|-------------|-------------|-------------|-------------|-------------|-------------|-------------|
|                                  | Crude OR             | 95% CI      | Adjusted OR | 95% CI      | Crude OR      | 95% CI      | Adjusted OR | 95% CI      | Crude OR    | 95% CI      | Adjusted OR | 95% CI      |
| Dry                              | 1.00 (ref.)          |             | 1.00 (ref.) |             | 1.00 (ref.)   |             | 1.00 (ref.) |             | 1.00 (ref.) |             | 1.00 (ref.) |             |
| Wet/Slippery                     | 0.83                 | 0.81 - 0.85 | 0.85        | 0.83 - 0.87 | 0.82          | 0.80 - 0.84 | 0.84        | 0.81 - 0.86 | 0.97        | 0.89 - 1.06 | 1.01        | 0.93 - 1.11 |
| Road defect                      |                      |             |             |             |               |             |             |             |             |             |             |             |
| No                               | 1.00 (ref.)          |             | 1.00 (ref.) |             | 1.00 (ref.)   |             | 1.00 (ref.) |             | 1.00 (ref.) |             | 1.00 (ref.) |             |
| Yes                              | 1.33                 | 1.25 - 1.42 | 0.95        | 0.89 - 1.01 | 1.36          | 1.28 - 1.44 | 0.96        | 0.90 - 1.03 | 1.16        | 0.87 - 1.56 | 1.00        | 0.74 - 1.36 |
| Barrier                          |                      |             |             |             |               |             |             |             |             |             |             |             |
| No                               | 1.00 (ref.)          |             | 1.00 (ref.) |             | 1.00 (ref.)   |             | 1.00 (ref.) |             | 1.00 (ref.) |             | 1.00 (ref.) |             |
| Yes                              | 1.12                 | 1.07 - 1.16 | 0.99        | 0.95 - 1.03 | 1.14          | 1.09 - 1.18 | 0.99        | 0.95 - 1.03 | 0.89        | 0.76 - 1.05 | 0.92        | 0.78 - 1.09 |
| Traffic signal                   |                      |             |             |             |               |             |             |             |             |             |             |             |
| Yes                              | 1.00 (ref.)          |             | 1.00 (ref.) |             | 1.00 (ref.)   |             | 1.00 (ref.) |             | 1.00 (ref.) |             | 1.00 (ref.) |             |
| No                               | 1.31                 | 1.29 - 1.33 | 1.02        | 1.00 - 1.04 | 1.31          | 1.29 - 1.33 | 1.03        | 1.01 - 1.05 | 1.10        | 1.04 - 1.17 | 0.93        | 0.87 - 1.00 |
| Separation of traffic directions |                      |             |             |             |               |             |             |             |             |             |             |             |
| Yes                              | 1.00 (ref.)          |             | 1.00 (ref.) |             | 1.00 (ref.)   |             | 1.00 (ref.) |             | 1.00 (ref.) |             | 1.00 (ref.) |             |
| No                               | 0.92                 | 0.90 - 0.93 | 1.21        | 1.19 - 1.24 | 0.92          | 0.91 - 0.94 | 1.21        | 1.19 - 1.23 | 0.91        | 0.86 - 0.96 | 1.09        | 1.02 - 1.16 |
| Traffic island                   |                      |             |             |             |               |             |             |             |             |             |             |             |
| Yes                              | 1.00 (ref.)          |             | 1.00 (ref.) |             | 1.00 (ref.)   |             | 1.00 (ref.) |             | 1.00 (ref.) |             | 1.00 (ref.) |             |
| No                               | 0.82                 | 0.80 - 0.83 | 0.74        | 0.73 - 0.76 | 0.82          | 0.80 - 0.83 | 0.74        | 0.73 - 0.76 | 0.84        | 0.80 - 0.89 | 0.80        | 0.75 - 0.86 |
| Crash type                       |                      |             |             |             |               |             |             |             |             |             |             |             |
| Multiple vehicle                 | 1.00 (ref.)          |             | 1.00 (ref.) |             | 1.00 (ref.)   |             | 1.00 (ref.) |             | 1.00 (ref.) |             | 1.00 (ref.) |             |
| Single vehicle                   | 2.34                 | 2.29 - 2.38 | 1.75        | 1.71 - 1.79 | 2.42          | 2.38 - 2.47 | 1.76        | 1.72 - 1.79 | 1.68        | 1.50 - 1.88 | 1.56        | 1.38 - 1.76 |

<sup>a</sup>BAC: Blood alcohol concentration

1  
2  
3  
4  
5  
6  
7 The pooled model revealed that bicyclists were 18% significantly less likely to be  
8  
9 hospitalised for head injuries than motorcyclists were (AOR=0.82; CI=0.79-0.85). Moreover,  
10  
11 factors such as the females (CI=1.07-1.10), age 65 or above (CI=1.19-1.28), rural areas  
12  
13 (CI=2.66-2.83), BAC level>0.03% (CI=2.73-2.87), no use of a helmet (CI=1.74-1.81),  
14  
15 darkness (CI=1.03-1.12), no separator of divided traffic direction (CI=1.19-1.24), and  
16  
17 single-vehicle crash(CI=1.71-1.79) were found to be the most significantly associated with  
18  
19 hospitalisation for head injuries.  
20  
21  
22  
23  
24  
25

26  
27 The estimated crude and adjusted ORs (AORs) of the two separate models evaluating  
28  
29 factors contributing to the hospitalisation of motorcyclists and bicyclists for head injuries  
30  
31 were identical to those of the pooled model. Noteworthy results include that female  
32  
33 motorcyclists (AOR=1.03) and elderly motorcyclists and bicyclists (AORs=1.23 and 1.92,  
34  
35 respectively) were more likely to be hospitalised for head injuries. Accidents that occurred in  
36  
37 rural areas were associated with a higher risk of hospitalisation for head injuries among  
38  
39 motorcyclists and bicyclists (AORs=2.77 and 2.94, respectively). The odds of hospitalisation  
40  
41 were higher in riders of mopeds who sustained head injuries than in heavy-motorcycles riders  
42  
43 (AOR=1.18). Intoxicated motorcyclists and bicyclists had a higher risk of hospitalisation for  
44  
45 head injuries (AORs=1.48 and 2.64, respectively). Riding without helmets was found to be a  
46  
47 risk factor in both motorcyclists and bicyclists (AORs=1.73 and 1.24, respectively).  
48  
49  
50  
51  
52  
53  
54  
55  
56  
57  
58  
59  
60

1  
2  
3  
4 Motorcyclists travelling without a legal licence were more prone to be hospitalised for head  
5  
6  
7 injuries (AOR=1.36). Furthermore, curved roadways and dusk or dawn were associated with  
8  
9  
10 an increased risks of hospitalisation for head injuries among bicyclists (AORs=1.16 and 1.28,  
11  
12  
13 respectively).

14  
15 The risk of hospitalisation for head injuries was higher among motorcyclists and  
16  
17 bicyclists involved in MVCs that occurred on roadways without separation of traffic direction  
18  
19 (AORs=1.21 and 1.09, respectively). Moreover, the risk of hospitalisation for head injuries  
20  
21 was 76% and 56% (AORs=1.76 and 1.56, respectively) higher in motorcyclists and bicyclists  
22  
23  
24 involved in single-vehicle crashes than in those involved in multi-vehicle crashes.  
25  
26  
27  
28  
29  
30  
31  
32

### 33 **Discussions**

34  
35  
36  
37  
38  
39  
40  
41  
42  
43  
44  
45  
46  
47  
48  
49  
50  
51  
52  
53  
54  
55  
56  
57  
58  
59  
60

The A1A2 police accident data and the NHIRD provide a reliable data source that facilitates the determination of various factors associated with an increased risk of hospitalisation for head injuries among motorcyclists and bicyclists in Taiwan. The factors were modelled separately to estimate crude ORs. The results suggest that compared with motorcyclists, bicyclists sustaining head injuries were 59% more likely to be hospitalised. However, the results of multivariate logistic models revealed that compared with motorcyclists, bicyclists who sustained head injuries had an 18% decreased probability of

1  
2  
3  
4 being hospitalised. After the adjustment of this result for other factors, helmet use appeared to  
5  
6  
7 be beneficial in reducing the risks of hospitalisation for head injuries among bicyclists. Our  
8  
9  
10 finding here underscores the importance of helmet use among bicyclists, particularly in cities  
11  
12  
13 where bike-sharing programmes have been implemented but a helmet is not provided.

14  
15 In 2016, bicycle helmet use became compulsory for electric bicycle users but not for  
16  
17  
18 traditional bicycle users in Taiwan. A large-scale nationwide travel survey<sup>24</sup> reported that  
19  
20  
21 helmet use was relatively lower among bicyclists (6.8%) than among motorcyclists (82.2%).  
22  
23  
24 Because the use of e-bike (with higher velocities that may exacerbate crash impacts and injury  
25  
26  
27 outcomes) and racing bikes (which have been widely used for recreational purpose and  
28  
29  
30 travelling between cities) has been increasing in recent years, the government should consider  
31  
32  
33 making helmet use mandatory for all bicyclists and not only for users of electric bicycles.  
34  
35

36 In this study, two additional logistic models for motorcyclists and bicyclists were  
37  
38  
39 estimated. The results revealed that contributory factors to hospitalisation for head injuries are  
40  
41  
42 similar among motorcyclists and bicyclists. For instance, dusk or dawn was associated with a  
43  
44  
45 higher risk of hospitalisation for head injuries among motorcyclists and bicyclists. Our result  
46  
47  
48 here adds to existing literature of motorcycle and bicycle road safety by concluding that  
49  
50  
51 diminished light conditions are associated not only with accident occurrence<sup>25 26</sup> but also with  
52  
53  
54 head injury-related hospitalisation. It seems clear here that enhancing conspicuity, in  
55  
56  
57 particularly in diminished light conditions, may be an effective countermeasure to reduce both  
58  
59  
60

1  
2  
3  
4 accident risk and its consequences.

5  
6  
7 Our regression models revealed that the risk of hospitalisation is higher among elderly  
8  
9  
10 motorcyclists and bicyclists who sustained head injuries. Such a finding is in agreement with  
11  
12 that of Ekman et al. (2001)<sup>27</sup>, who reported that the risk of head injuries is higher among  
13  
14 elderly bicyclists than their younger counterparts. Our study results indicate that the risk of  
15  
16 head injury-related hospitalisation is higher among elderly motorcyclists and bicyclists. This  
17  
18 may be attributable to the fact that compared with young people, elderly people tend to have  
19  
20 more chronic diseases and can have more complications after head injuries, and the  
21  
22 hospitalisation rates of elderly people can be higher after an accident<sup>28 29</sup>.

23  
24  
25  
26  
27  
28  
29  
30 The risk of head injury-related hospitalisation was higher among motorcyclists and  
31  
32 bicyclists involved in single-vehicle crashes. This finding may be attributable to higher crash  
33  
34 velocities being common in single-vehicle crashes, and helmet use being less common in rural  
35  
36 areas where single-vehicle crashes usually occur. Speed management schemes that target all  
37  
38 motorised vehicles in general and motorcycles and bicycles (e.g., e-bikes that now in general  
39  
40 may travel at more than 25 km/h) in particular may constitute effective countermeasures for  
41  
42 reducing hospitalisation rates for head injuries.

43  
44  
45  
46  
47  
48  
49  
50 Head injury-related hospitalisation was found to be associated with accidents that  
51  
52 occurred in rural areas. This may be because of increasing kinetic energy and greater impact  
53  
54 at higher speeds in rural settings<sup>30 31</sup>. In addition, heads are more likely to be exposed without  
55  
56  
57  
58  
59  
60

1  
2  
3  
4 any protection as a result of less common use of helmets in rural areas. Our conjecture is  
5  
6 supported by the findings of past studies<sup>32</sup> on motorcycle helmet use that concluded that  
7  
8 compared with riders in cities, riders in rural areas were 7 times less likely to wear helmets. In  
9  
10 addition, a national survey administrated by the HPA<sup>24</sup> reported that the bicycle helmet use  
11  
12 rate in urbanised areas was 1.5 times higher than that in rural areas. Moreover, the  
13  
14 requirement of additional time for emergency-vehicle response in rural areas and the lower  
15  
16 availability of medical resources in such areas<sup>33</sup> predispose people with head injuries to  
17  
18 hospitalisation.  
19  
20  
21  
22  
23  
24  
25  
26

27 Our study results revealed that the risk of hospitalisation was higher in both motorcyclists  
28  
29 and bicyclists who sustained injuries in MVCs on roadways where traffic directions were not  
30  
31 separated. This may be because of higher crash velocities at such locations. The road sections  
32  
33 maybe wide, and speed limits may be higher for locations where the traffic is not divided by  
34  
35 any traffic barrier. Therefore, head injuries resulting from accidents in these locations may  
36  
37 require hospitalisation.  
38  
39  
40  
41  
42  
43

44 Our research certainly has limitations. Data not available from the A1A2 police accident  
45  
46 dataset and the NHIRD would open up possibilities for additional analyses including  
47  
48 motorcycle and bicycle types (a greater classification of engine size and electric bicycles),  
49  
50 traffic volume, geometric characteristics, and electronic device use (e.g., phone and MP3  
51  
52 players). These factors may also have a role in injury outcomes and thus hospitalisation rates.  
53  
54  
55  
56  
57  
58  
59  
60

1  
2  
3  
4  
5  
6  
7 **What is already known on this subject?**  
8

9  
10 The main body region of injury causing bicyclist deaths was the head, and bicyclists were 2.6  
11  
12 times more likely to be fatally injured than motorcyclists were in Taiwan.  
13

14  
15  
16  
17  
18 **What this study adds**  
19

20  
21 Univariate logistic models revealed that compared with motorcyclists, bicyclists were 59%  
22  
23 more likely to be hospitalised for head injuries.  
24

25  
26  
27 After adjustment for other factors including helmet use in the multivariate logistic analysis,  
28  
29 bicyclists who sustained head injuries were 18% less likely to be hospitalised than  
30  
31 motorcyclists were.  
32  
33  
34  
35  
36  
37  
38  
39  
40

41 **Acknowledgements:**  
42

43  
44 Pai CW contributes to data analysis, interpretation of the data, and final approval of the  
45  
46 version to be published.  
47  
48

49  
50 Chen YC contributes to data analysis, and final approval of the version to be published.  
51

52  
53 Lin HY contributes to conception of the work, critically review the manuscript, and final  
54  
55 approval of the version to be published.  
56  
57  
58  
59  
60



1  
2  
3  
4 Chen PL contributes to the design of the work, data analysis, interpretation of the data,  
5  
6  
7 drafting the manuscript and final approval of the version to be published.  
8

9  
10 The authors declare to have no conflict of interests.  
11

12  
13 This study was supported by a grant from the Health Promotion Administration, Ministry of  
14  
15 Health and Welfare, Executive Yuan, Taiwan (Grant number: E1030909-104).  
16

17  
18 No additional data available.  
19  
20  
21  
22  
23  
24  
25  
26  
27  
28  
29  
30  
31  
32  
33  
34  
35  
36  
37  
38  
39  
40  
41  
42  
43  
44  
45  
46  
47  
48  
49  
50  
51  
52  
53  
54  
55  
56  
57  
58  
59  
60

## Reference

1. Depreitere B, Van Lierde C, Maene S, et al. Bicycle-related head injury: a study of 86 cases. *Accident Analysis & Prevention* 2004;36(4):561-67.
2. Mayrose J. The effects of a mandatory motorcycle helmet law on helmet use and injury patterns among motorcyclist fatalities. *Journal of Safety Research* 2008;39(4):429-32.
3. Wiznia DH, Kim C-Y, Dai F, et al. The effect of helmets on motorcycle outcomes in a Level I trauma center in Connecticut. *Traffic injury prevention* 2016;17(6):633-37.
4. Chen PL. Statistics for injury surveillance: Health Promotion Administration, Ministry of Health and Welfare, 2015.
5. Ministry of Transportation and Communications. Traffic statistics of year 2014. In: Ministry of Transportation and Communications T, Republic of China., ed., 2015.
6. Chiu W-T, Chu S-F, Chang C-K, et al. Implementation of a motorcycle helmet law in Taiwan and traffic deaths over 18 years. *JAMA* 2011;306(3):267-68.
7. Ichikawa M, Chadbunchachai W, Marui E. Effect of the helmet act for motorcyclists in Thailand. *Accident Analysis & Prevention* 2003;35(2):183-89.
8. Supramaniam V, van Belle G, Sung JF. Fatal motorcycle accidents and helmet laws in peninsular Malaysia. *Accident Analysis & Prevention* 1984;16(3):157-62.
9. Passmore J, Tu NTH, Luong MA, et al. Impact of mandatory motorcycle helmet wearing legislation on head injuries in Viet Nam: results of a preliminary analysis. *Traffic injury prevention* 2010;11(2):202-06.
10. Servadei F, Begliomini C, Gardini E, et al. Effect of Italy's motorcycle helmet law on traumatic brain injuries. *Injury prevention* 2003;9(3):257-60.
11. Amoros E, Chiron M, Martin J-L, et al. Bicycle helmet wearing and the risk of head, face, and neck injury: a French case-control study based on a road trauma registry. *Injury Prevention* 2011;ip. 2011.031815.
12. Attewell RG, Glase K, McFadden M. Bicycle helmet efficacy: a meta-analysis. *Accident Analysis & Prevention* 2001;33(3):345-52.
13. Clarke CF. Evaluation of New Zealand's bicycle helmet law. *The New Zealand Medical Journal (Online)* 2012;125(1349)
14. Macpherson A, Spinks A. Bicycle helmet legislation for the uptake of helmet use and prevention of head injuries (Review). *Cochrane Database of Systematic Reviews* 2007;2
15. Dennis J, Potter B, Ramsay T, et al. The effects of provincial bicycle helmet legislation on helmet use and bicycle ridership in Canada. *Injury Prevention* 2010;16(4):219-24.
16. Walter SR, Olivier J, Churches T, et al. The impact of compulsory cycle helmet legislation on cyclist head injuries in New South Wales, Australia. *Accident Analysis &*

- 1  
2  
3 *Prevention* 2011;43(6):2064-71.
- 4 17. Bambach MR, Mitchell R, Grzebieta RH, et al. The effectiveness of helmets in bicycle  
5 collisions with motor vehicles: A case-control study. *Accident Analysis & Prevention*  
6 2013;53:78-88.
- 7  
8 18. Olofsson E, Bunketorp O, Andersson A-L. Helmet use and injuries in children's bicycle  
9 crashes in the Gothenburg region. *Safety Science* 2017;92:311-17.
- 10 19. Bonander C, Nilson F, Andersson R. The effect of the Swedish bicycle helmet law for  
11 children: an interrupted time series study. *Journal of safety research* 2014;51:15-22.
- 12 20. Povey LJ, Frith W, Graham P. Cycle helmet effectiveness in New Zealand. *Accident*  
13 *Analysis & Prevention* 1999;31(6):763-70.
- 14 21. Scuffham P, Alsop J, Cryer C, et al. Head injuries to bicyclists and the New Zealand  
15 bicycle helmet law. *Accident Analysis & Prevention* 2000;32(4):565-73.
- 16 22. Chen PL, Jou RC, Saleh W, et al. Accidents involving pedestrians with their backs to  
17 traffic or facing traffic: an evaluation of crash characteristics and injuries. *Journal of*  
18 *Advanced Transportation* 2016;50(5):736-51.
- 19 23. Sun Y, Chang Y-H, Chen H-F, et al. Risk of Parkinson disease onset in patients with  
20 diabetes. *Diabetes care* 2012;35(5):1047-49.
- 21 24. Administration) HHP. Nation Health Interview Survey 2013. In: Health Promotion  
22 Administration MoHaW, ed., 2013.
- 23 25. Pai C-W. Motorcycle right-of-way accidents—A literature review. *Accident Analysis &*  
24 *Prevention* 2011;43(3):971-82.
- 25 26. Wood JM, Tyrrell RA, Marszalek R, et al. Bicyclists overestimate their own night-time  
26 conspicuity and underestimate the benefits of retroreflective markers on the moveable  
27 joints. *Accident Analysis & Prevention* 2013;55:48-53.
- 28 27. Ekman R, Welander G, Svanström L, et al. Bicycle-related injuries among the elderly—a  
29 new epidemic? *Public Health* 2001;115(1):38-43.
- 30 28. Cook LJ, Knight S, Olson LM, et al. Motor vehicle crash characteristics and medical  
31 outcomes among older drivers in Utah, 1992-1995. *Annals of emergency medicine*  
32 2000;35(6):585-91.
- 33 29. Rakotonirainy A, Steinhardt D, Delhomme P, et al. Older drivers' crashes in Queensland,  
34 Australia. *Accident Analysis & Prevention* 2012;48:423-29.
- 35 30. Pai C-W, Saleh W. Exploring motorcyclist injury severity in approach-turn collisions at  
36 T-junctions: Focusing on the effects of driver's failure to yield and junction control  
37 measures. *Accident Analysis & Prevention* 2008;40(2):479-86.
- 38 31. Broughton J. Car occupant and motorcyclist deaths, 1994-20022005.
- 39 32. Akaateba MA, Amoh-Gyimah R, Yakubu I. A cross-sectional observational study of  
40 helmet use among motorcyclists in Wa, Ghana. *Accident Analysis & Prevention*  
41 2014;64:18-22.
- 42 33. Noland R, Quddus M. Analysis of pedestrian and bicycle casualties with regional panel  
43  
44  
45  
46  
47  
48  
49  
50  
51  
52  
53  
54  
55  
56  
57  
58  
59  
60

1  
2  
3 data. *Transportation Research Record: Journal of the Transportation Research Board*  
4 2004(1897):28-33.  
5  
6  
7  
8  
9  
10  
11  
12  
13  
14  
15  
16  
17  
18  
19  
20  
21  
22  
23  
24  
25  
26  
27  
28  
29  
30  
31  
32  
33  
34  
35  
36  
37  
38  
39  
40  
41  
42  
43  
44  
45  
46  
47  
48  
49  
50  
51  
52  
53  
54  
55  
56  
57  
58  
59  
60

For peer review only

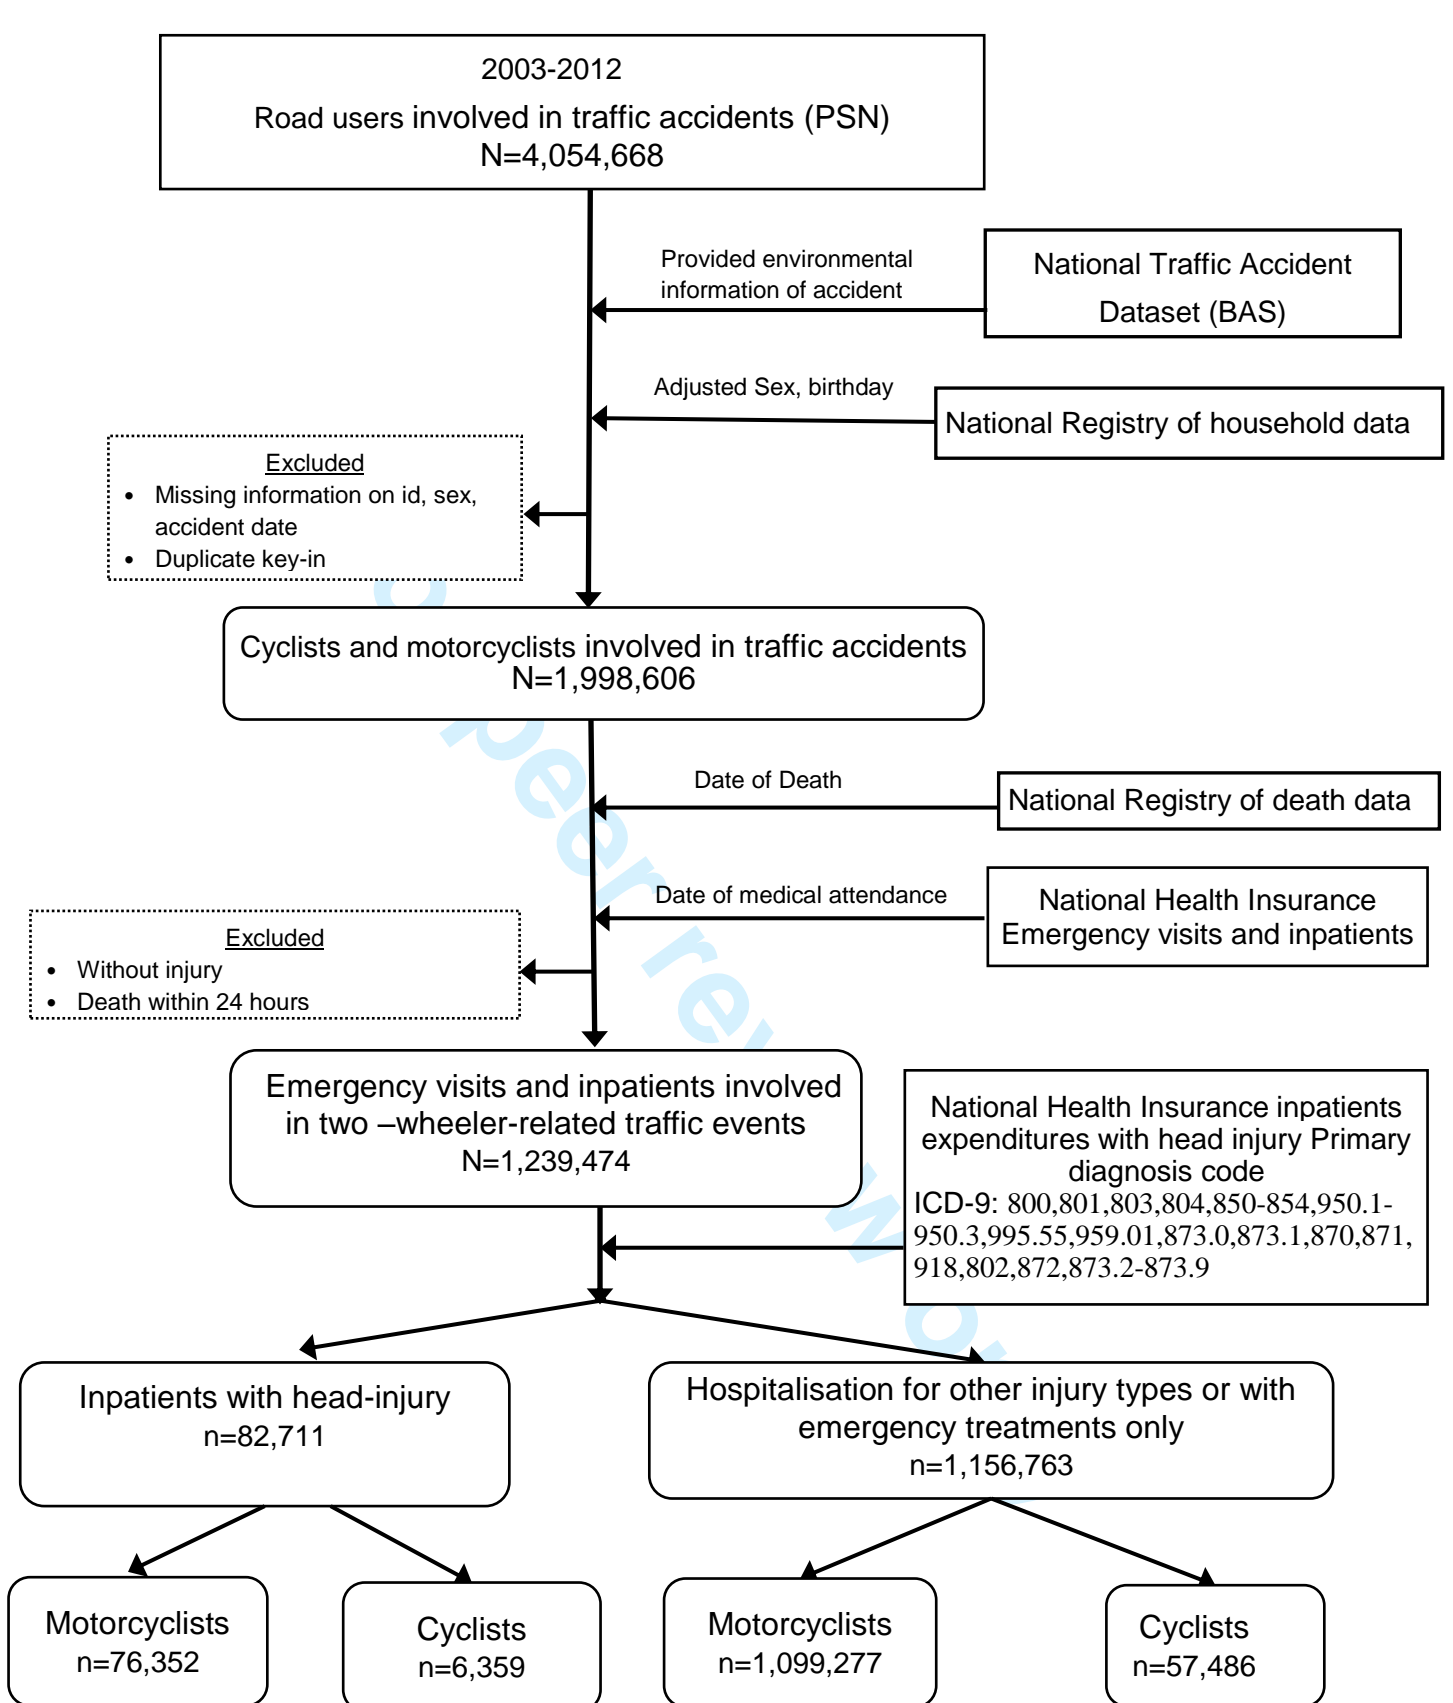

Appendix 1. Study flow diagram

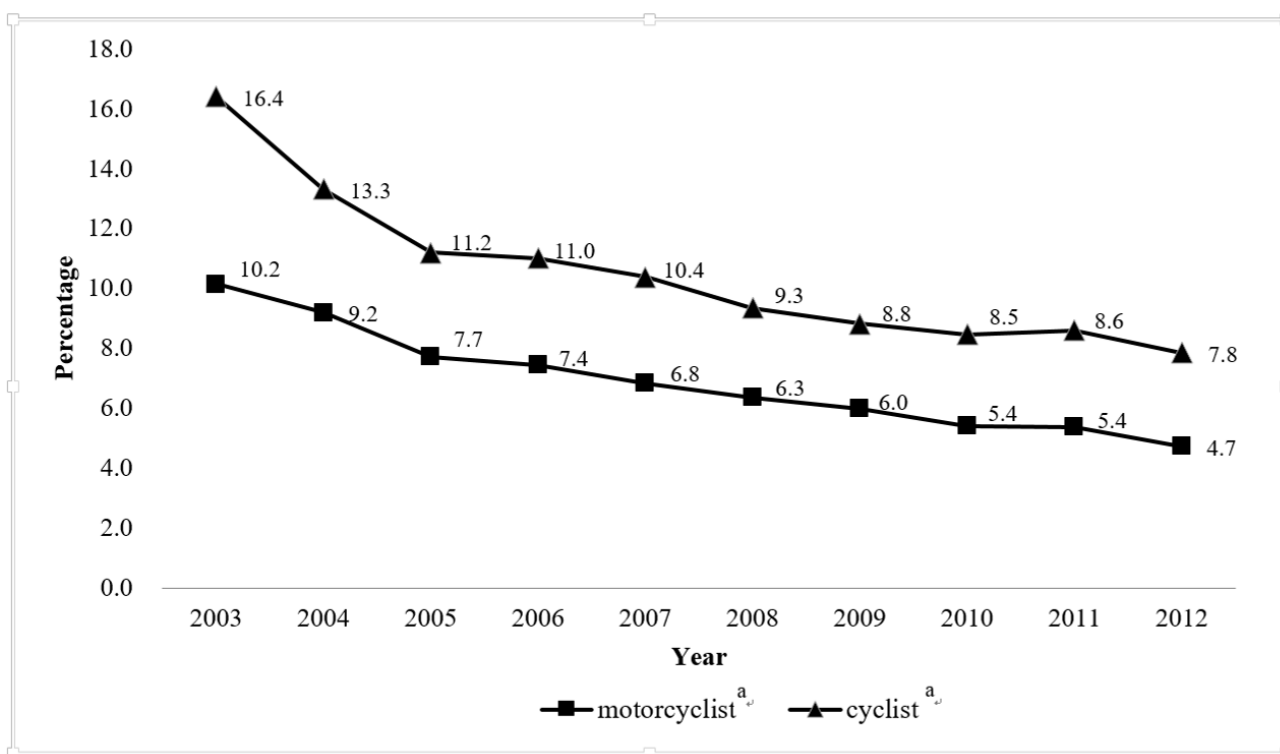

Appendix 2. Trend of head injuries among two-wheeler riders involved in all emergency and inpatient visits for two-wheeler traffic accidents.

<sup>a</sup> :significantly decreasing according to the Mann-Kendall trend test

## STROBE Statement—checklist of items that should be included in reports of observational studies

|                           | Item No | Recommendation                                                                                                                                                                                                                                                                                                      | Page  |
|---------------------------|---------|---------------------------------------------------------------------------------------------------------------------------------------------------------------------------------------------------------------------------------------------------------------------------------------------------------------------|-------|
| <b>Title and abstract</b> | 1       | (a) Indicate the study's design with a commonly used term in the title or the abstract                                                                                                                                                                                                                              | 2     |
|                           |         | (b) Provide in the abstract an informative and balanced summary of what was done and what was found                                                                                                                                                                                                                 | 2     |
| <b>Introduction</b>       |         |                                                                                                                                                                                                                                                                                                                     |       |
| Background/rationale      | 2       | Explain the scientific background and rationale for the investigation being reported                                                                                                                                                                                                                                | 6-8   |
| Objectives                | 3       | State specific objectives, including any prespecified hypotheses                                                                                                                                                                                                                                                    | 8     |
| <b>Methods</b>            |         |                                                                                                                                                                                                                                                                                                                     |       |
| Study design              | 4       | Present key elements of study design early in the paper                                                                                                                                                                                                                                                             | 9     |
| Setting                   | 5       | Describe the setting, locations, and relevant dates, including periods of recruitment, exposure, follow-up, and data collection                                                                                                                                                                                     | 9-11  |
| Participants              | 6       | (a) <i>Cohort study</i> —Give the eligibility criteria, and the sources and methods of selection of participants. Describe methods of follow-up                                                                                                                                                                     | 10-11 |
|                           |         | <i>Case-control study</i> —Give the eligibility criteria, and the sources and methods of case ascertainment and control selection. Give the rationale for the choice of cases and controls<br><i>Cross-sectional study</i> —Give the eligibility criteria, and the sources and methods of selection of participants |       |
| Variables                 | 7       | (b) <i>Cohort study</i> —For matched studies, give matching criteria and number of exposed and unexposed                                                                                                                                                                                                            | N/A   |
|                           |         | <i>Case-control study</i> —For matched studies, give matching criteria and the number of controls per case                                                                                                                                                                                                          |       |
| Data sources/measurement  | 8*      | Clearly define all outcomes, exposures, predictors, potential confounders, and effect modifiers. Give diagnostic criteria, if applicable                                                                                                                                                                            | 11-12 |
|                           |         | For each variable of interest, give sources of data and details of methods of assessment (measurement). Describe comparability of assessment methods if there is more than one group                                                                                                                                | 9-12  |
| Bias                      | 9       | Describe any efforts to address potential sources of bias                                                                                                                                                                                                                                                           | 9     |
| Study size                | 10      | Explain how the study size was arrived at                                                                                                                                                                                                                                                                           | 10-11 |
| Quantitative variables    | 11      | Explain how quantitative variables were handled in the analyses. If applicable, describe which groupings were chosen and why                                                                                                                                                                                        | 11-12 |
| Statistical methods       | 12      | (a) Describe all statistical methods, including those used to control for confounding                                                                                                                                                                                                                               | 12    |
|                           |         | (b) Describe any methods used to examine subgroups and interactions                                                                                                                                                                                                                                                 | N/A   |
|                           |         | (c) Explain how missing data were addressed                                                                                                                                                                                                                                                                         | 10-11 |
|                           |         | (d) <i>Cohort study</i> —If applicable, explain how loss to follow-up was addressed<br><i>Case-control study</i> —If applicable, explain how matching of cases and controls was addressed<br><i>Cross-sectional study</i> —If applicable, describe analytical methods taking                                        | 10-11 |

1  
2  
3 account of sampling strategy

---

4 (e) Describe any sensitivity analyses

N/A

5 Continued on next page

6  
7  
8  
9  
10  
11  
12  
13  
14  
15  
16  
17  
18  
19  
20  
21  
22  
23  
24  
25  
26  
27  
28  
29  
30  
31  
32  
33  
34  
35  
36  
37  
38  
39  
40  
41  
42  
43  
44  
45  
46  
47  
48  
49  
50  
51  
52  
53  
54  
55  
56  
57  
58  
59  
60

For peer review only



| <b>Results</b>           |     |                                                                                                                                                                                                              |            |
|--------------------------|-----|--------------------------------------------------------------------------------------------------------------------------------------------------------------------------------------------------------------|------------|
| Participants             | 13* | (a) Report numbers of individuals at each stage of study—eg numbers potentially eligible, examined for eligibility, confirmed eligible, included in the study, completing follow-up, and analysed            | 8-9        |
|                          |     | (b) Give reasons for non-participation at each stage                                                                                                                                                         | N/A        |
|                          |     | (c) Consider use of a flow diagram                                                                                                                                                                           | Appendix 1 |
| Descriptive data         | 14* | (a) Give characteristics of study participants (eg demographic, clinical, social) and information on exposures and potential confounders                                                                     | 11         |
|                          |     | (b) Indicate number of participants with missing data for each variable of interest                                                                                                                          | 8          |
|                          |     | (c) <i>Cohort study</i> —Summarise follow-up time (eg, average and total amount)                                                                                                                             | N/A        |
| Outcome data             | 15* | <i>Cohort study</i> —Report numbers of outcome events or summary measures over time                                                                                                                          | N/A        |
|                          |     | <i>Case-control study</i> —Report numbers in each exposure category, or summary measures of exposure                                                                                                         | N/A        |
|                          |     | <i>Cross-sectional study</i> —Report numbers of outcome events or summary measures                                                                                                                           | 8-9, 11    |
| Main results             | 16  | (a) Give unadjusted estimates and, if applicable, confounder-adjusted estimates and their precision (eg, 95% confidence interval). Make clear which confounders were adjusted for and why they were included | 19-24      |
|                          |     | (b) Report category boundaries when continuous variables were categorized                                                                                                                                    | N/A        |
|                          |     | (c) If relevant, consider translating estimates of relative risk into absolute risk for a meaningful time period                                                                                             | N/A        |
| Other analyses           | 17  | Report other analyses done—eg analyses of subgroups and interactions, and sensitivity analyses                                                                                                               | N/A        |
| <b>Discussion</b>        |     |                                                                                                                                                                                                              |            |
| Key results              | 18  | Summarise key results with reference to study objectives                                                                                                                                                     | 24-25      |
| Limitations              | 19  | Discuss limitations of the study, taking into account sources of potential bias or imprecision. Discuss both direction and magnitude of any potential bias                                                   | 27         |
| Interpretation           | 20  | Give a cautious overall interpretation of results considering objectives, limitations, multiplicity of analyses, results from similar studies, and other relevant evidence                                   | 25-27      |
| Generalisability         | 21  | Discuss the generalisability (external validity) of the study results                                                                                                                                        | N/A        |
| <b>Other information</b> |     |                                                                                                                                                                                                              |            |
| Funding                  | 22  | Give the source of funding and the role of the funders for the present study and, if applicable, for the original study on which the present article is based                                                | 28         |

\*Give information separately for cases and controls in case-control studies and, if applicable, for exposed and unexposed groups in cohort and cross-sectional studies.

**Note:** An Explanation and Elaboration article discusses each checklist item and gives methodological background and published examples of transparent reporting. The STROBE checklist is best used in conjunction with this article (freely available on the Web sites of PLoS Medicine at <http://www.plosmedicine.org/>, Annals of Internal Medicine at <http://www.annals.org/>, and Epidemiology at <http://www.epidem.com/>). Information on the STROBE Initiative is available at [www.strobe-statement.org](http://www.strobe-statement.org).

# BMJ Open

## A population-based case-control study of hospitalisation due to head injuries among motorcyclists and cyclists in Taiwan

|                                 |                                                                                                                                                                                                                                                                                                                                                                                                                                             |
|---------------------------------|---------------------------------------------------------------------------------------------------------------------------------------------------------------------------------------------------------------------------------------------------------------------------------------------------------------------------------------------------------------------------------------------------------------------------------------------|
| Journal:                        | <i>BMJ Open</i>                                                                                                                                                                                                                                                                                                                                                                                                                             |
| Manuscript ID                   | bmjopen-2017-018574.R1                                                                                                                                                                                                                                                                                                                                                                                                                      |
| Article Type:                   | Research                                                                                                                                                                                                                                                                                                                                                                                                                                    |
| Date Submitted by the Author:   | 08-Sep-2017                                                                                                                                                                                                                                                                                                                                                                                                                                 |
| Complete List of Authors:       | Pai, Chih-Wei; Taipei Medical University, College of Public Health , Graduate Institute of Injury Prevention and Control<br>Chen, Yi-Chu; Graduate Institute of Public Health, College of Public Health, Taipei Medical University<br>Lin, Hsiao-Yu; Taipei Medical University Hospital, Department of Urology<br>Chen, Ping-Ling; Taipei Medical University, College of Public Health, Graduate Institute of Injury Prevention and Control |
| <b>Primary Subject Heading</b>: | Public health                                                                                                                                                                                                                                                                                                                                                                                                                               |
| Secondary Subject Heading:      | Emergency medicine, Epidemiology                                                                                                                                                                                                                                                                                                                                                                                                            |
| Keywords:                       | ACCIDENT & EMERGENCY MEDICINE, PUBLIC HEALTH, TRAUMA MANAGEMENT                                                                                                                                                                                                                                                                                                                                                                             |
|                                 |                                                                                                                                                                                                                                                                                                                                                                                                                                             |

SCHOLARONE™  
Manuscripts

1  
2  
3  
4 **1 A population-based case-control study of hospitalisation due to head injuries**  
5  
6  
7 **2 among motorcyclists and cyclists in Taiwan**  
8  
9  
10 **3**

11  
12 4 Chih-Wei Pai<sup>a</sup>; Yi-Chu Chen<sup>b</sup>; Hsiao-Yu Lin<sup>c,\*</sup>; Ping-Ling Chen<sup>a,\*</sup>  
13  
14

15 <sup>a</sup> Graduate Institute of Injury Prevention and Control, College of Public Health, Taipei  
16  
17  
18 6 Medical University. Taiwan ROC  
19

20  
21 <sup>b</sup> Graduate Institute of Public Health, College of Public Health, Taipei Medical  
22  
23  
24 8 University. Taiwan ROC  
25  
26

27 <sup>c</sup> Department of Urology, Taipei Medical University Hospital. Taiwan ROC  
28  
29

30 \* Corresponding authors, these authors contributed equally to this work.  
31

32  
33 11 Email: [ablin@tmu.edu.tw](mailto:ablin@tmu.edu.tw) (HYL); [plchen@tmu.edu.tw](mailto:plchen@tmu.edu.tw) (PLC)  
34

35  
36 12 +886 02-27361661 ext.6582  
37

38  
39 13 Address: Graduate Institute of Injury Prevention and Control, College of Public  
40  
41  
42 14 Health, Taipei Medical University, 250 Wuxing St, Taipei City, Taiwan 110.  
43  
44  
45  
46

47 **16 Word count: 3154**  
48  
49  
50  
51  
52  
53  
54  
55  
56  
57  
58  
59  
60

1  
2  
3  
4 18 **Abstract**  
5

6  
7 19 **Introduction**  
8

9  
10 20 According to official statistics in Taiwan, the main body region of injury causing  
11  
12 21 bicyclist deaths was the head, and bicyclists were 2.6 times more likely to be fatally  
13  
14 22 injured than motorcyclists were. There is currently a national helmet law for  
15  
16 23 motorcyclists but not for cyclists.  
17

18  
19  
20 24 **Objectives**  
21

22  
23 25 The primary aim of this study was to determine whether cyclist casualties, compared  
24  
25 26 with motorcyclists, have higher odds of head-related hospitalisation. This study also  
26  
27 27 aims to investigate the determinants of head-injury related hospitalisation among  
28  
29 28 bicyclists and motorcyclists, respectively.  
30  
31  
32

33  
34  
35 29 **Methods**  
36

37  
38 30 Using linked data of the National Traffic Accident Dataset and the National Health  
39  
40 31 Insurance Research Database for the period between 2003 and 2012, this study  
41  
42 32 investigates the crash characteristics of bicyclist and motorcyclist casualties presented  
43  
44 33 to hospitals due to motor vehicle crashes. Head injury-related hospitalisation was used  
45  
46 34 as the study outcome for both road users to evaluate whether various factors (e.g.  
47  
48 35 human attributes, road and weather conditions, and vehicle characteristics) are related  
49  
50 36 to hospital admission of those who sustained serious injuries.  
51  
52  
53  
54  
55  
56  
57  
58  
59  
60

1  
2  
3  
4 37 **Results**  
5

6 38 A total of 1239474 motorcyclist and cyclist casualties, the proportion of bicyclists  
7  
8  
9 39 hospitalised for head injuries was higher than that of motorcyclists (10.0% vs. 6.5%).  
10  
11  
12 40 However, the multiple logistic regression model shows that after the adjustment of  
13  
14  
15 41 this result for other factors such as helmet use, bicyclists were 18% significantly less  
16  
17  
18 42 likely to be hospitalised for head injuries than motorcyclists were (AOR=0.82;  
19  
20  
21 43 CI=0.79-0.85). Other important determinants of head-injury related hospitalisation for  
22  
23  
24 44 motorcyclists and cyclists include female riders, elderly riders, crashes that occurred  
25  
26  
27 45 in rural areas, moped riders, riding unhelmeted, intoxicated motorcyclists and  
28  
29  
30 46 bicyclists, unlicensed motorcyclists, dusk and dawn conditions, and single-vehicle  
31  
32  
33 47 crashes.  
34

35  
36 48 **Conclusions**  
37

38 49 Our finding underscores the importance of helmet use in reducing hospitalisation due  
39  
40  
41 50 to head injuries among bicyclists while current helmet use is relatively low.  
42  
43  
44

45 51

46  
47 52 **Keywords:** Motorcyclist and bicyclist; Head injury; Hospitalisation; Crashes  
48  
49

50 53  
51  
52  
53  
54  
55  
56  
57  
58  
59  
60

1  
2  
3  
4 54 **Strengths and limitations of this study**  
5  
6

7 55

8  
9  
10 56 ■ This is a comprehensive study using the linked data from these two datasets  
11  
12 which cover 99.9% of populations.  
13

14  
15 58 ■ Our results derived from the linked datasets can be more reliable than those  
16  
17 using a single database alone.  
18  
19

20  
21 60 ■ Hospitalisation data can be more clinically reliable than injury-severity data  
22  
23 that are commonly adopted in past studies.  
24  
25

26  
27 62 ■ The study is limited by the data that are unavailable from the two datasets  
28  
29 such as electronic device use (e.g., phone and MP3 players).  
30  
31

32  
33 64  
34  
35  
36  
37  
38  
39  
40  
41  
42  
43  
44  
45  
46  
47  
48  
49  
50  
51  
52  
53  
54  
55  
56  
57  
58  
59  
60

1  
2  
3  
4 65 **Introduction**  
5  
6

7 66

8  
9  
10 67 Two-wheeled motor vehicle crashes involving motorcyclists and bicyclists have  
11  
12 68 been a serious safety problem in Taiwan with regard to injury severity and frequency.  
13  
14  
15 69 Studies have suggested that head injuries are the primary cause of deaths and  
16  
17  
18 70 hospitalisation among motorcyclists and bicyclists<sup>1-3</sup>. A study reported that in Taiwan  
19  
20  
21 71 bicyclists were 2.6 times more likely to be fatally injured than motorcyclists were<sup>4</sup>.  
22  
23  
24 72 The head (approximately 61%) was the main body part that sustained injury resulting  
25  
26  
27 73 in death of these bicyclists<sup>5</sup>. Head injuries among motorcyclists have become less  
28  
29  
30 74 problematic since the enforcement of the helmet use law for motorcyclists in 1997<sup>6</sup>.  
31

32  
33 75 According to official accident statistics (the National Traffic Accident dataset), the  
34  
35  
36 76 number of motorcycle accidents has been steadily decreasing; however, the number of  
37  
38  
39 77 bicycle accidents has been stably increasing. This is primarily attributable to the  
40  
41  
42 78 increasing popularity of bicycle use. For instance, several bike sharing programmes  
43  
44  
45 79 have been implemented in several metropolitan cities such as Taipei City and  
46  
47  
48 80 Taichuang City. In addition, the use of electric bicycles and racing bikes, which are  
49  
50  
51 81 widely used for recreational purposes and travelling between cities, has been  
52  
53  
54 82 increasing.

55  
56 83 Studies conducted mainly in Asian countries on helmet use and motorcyclist  
57  
58  
59  
60

1  
2  
3  
4 84 injuries have reported that helmet use and related laws have successfully reduced head  
5  
6  
7 85 injuries, thus reducing fatalities among motorcyclists. Ichiwaka et al. (2003) reported  
8  
9  
10 86 a 41% reduction in head injuries in Thailand 2 years after the implementation of a  
11  
12 87 mandatory helmet use law<sup>7</sup>. A similar reduction in head injuries and fatalities has been  
13  
14 88 reported in Malaysia<sup>8</sup>, Vietnam<sup>9</sup>, the United States<sup>3</sup>, and Italy<sup>10</sup> after the  
15  
16  
17 89 implementation of helmet use laws. Bicycle helmet use is a means of reducing  
18  
19  
20 90 morbidity and mortality among bike users. Several case-controlled studies have  
21  
22 91 reported an association of helmet use with a decreased rate of head injury and mortality  
23  
24  
25 92 among riders of all ages, with bicycle helmets reducing the risk of head and brain  
26  
27 93 injury by 65%-88%<sup>11</sup>. Moreover, Attewell et al. (2001)<sup>12</sup> conducted a meta-analysis of  
28  
29  
30 94 16 observational studies and reported that bicycle helmets can significantly reduce the  
31  
32  
33 95 risks of head injury by approximately 60%.

34  
35  
36  
37  
38 96 Chiu et al. (2011) investigated motorcycle head injuries one year after the  
39  
40  
41 97 enforcement of the helmet use law in Taiwan and reported a 33% reduction in head  
42  
43  
44 98 injuries<sup>6</sup>. Helmet use became mandatory for users of electric bicycles in 2016, but not  
45  
46  
47 99 for conventional bicycles.

48  
49  
50 100 Current efforts to increase helmet use in order to prevent head injuries in accidents  
51  
52  
53 101 include campaigns to increase awareness regarding the importance of helmet use,  
54  
55  
56 102 along with advocating helmet use laws. Over the last decades, mandatory bicycle  
57  
58  
59  
60



1  
2  
3  
4 103 helmet use laws have been implemented in several countries including Australia, New  
5  
6  
7 104 Zealand, Sweden, and Canada. A study indicated that helmet use laws act as a  
8  
9  
10 105 deterrent to cycling<sup>13</sup>. Others studies have supported this decline in cycling<sup>14 15</sup>. In  
11  
12  
13 106 general, a positive effect of mandatory cycle helmet use laws on bicyclist head  
14  
15 107 injuries has been observed in Australia<sup>16 17</sup>, Sweden<sup>18 19</sup>, and New Zealand<sup>20 21</sup>.

16  
17  
18 108 When reviewed together, literature has suggested that helmet use and related laws  
19  
20  
21 109 are beneficial for reducing head injuries and fatalities among motorcyclists and  
22  
23  
24 110 bicyclists. In addition, the implementation of several bike-sharing programmes in  
25  
26  
27 111 metropolitan cities such as Taipei City and Taichuang City where bicycle helmets are  
28  
29  
30 112 not provided has presented a safety concern among bicyclists.

31  
32  
33 113 In Taiwan, helmet use is mandatory for motorcyclists but not cyclists. This leads  
34  
35  
36 114 to an important research question of whether cyclists involved in motor vehicle  
37  
38  
39 115 crashes (MVCs: a crash occurs when a vehicle collides with other road users, or other  
40  
41  
42 116 stationary objects such as a tree, telegraphy, or traffic island), compared with  
43  
44  
45 117 motorcyclists, are more likely to be hospitalised due to head injuries. The primary aim  
46  
47  
48 118 of this study was to determine whether cyclist casualties, compared with motorcyclists,  
49  
50  
51 119 have higher odds of head-related hospitalisation. Another important research  
52  
53  
54 120 hypothesis of the current research is that risk factors that influence head-injury related  
55  
56  
57 121 hospitalisation among motorcyclists and bicyclists may include helmet use, alcohol

1  
2  
3  
4 122 consumption, or license status etc. This study also aims to investigate the  
5  
6  
7 123 determinants of head-injury related hospitalisation among bicyclists and motorcyclists,  
8  
9  
10 124 respectively.

11  
12  
13 125

## 14 15 16 126 **Materials and Methods**

17  
18  
19 127

### 20 21 128 *Data source*

22  
23  
24 129 Two datasets, police-reported crash data provided by the National Police Agency,  
25  
26  
27 130 Ministry of the Interior, and the National Health Insurance Research Database  
28  
29  
30 131 (NHIRD) provided by the Health and Welfare Data Science Center, Ministry of  
31  
32  
33 132 Health and Welfare, were used in the present study. The National Traffic Accident  
34  
35  
36 133 Dataset is recorded by trained police accident investigators after an accident has been  
37  
38  
39 134 reported to police. The National Traffic Accident Dataset report forms comprise the  
40  
41  
42 135 following three files: accident, vehicle, and victim files. A thorough description of  
43  
44  
45 136 National Traffic Accident Dataset can be found in the study of Chen et al. (2016)<sup>22</sup>.

46  
47 137 The Bureau of National Health Insurance (BNHI) in Taiwan implemented the  
48  
49  
50 138 National Health Insurance (NHI) programme on 1 March, 1995, and the NHI covers  
51  
52  
53 139 99% of the resident of Taiwan. The NHIRD comprises the outpatient and inpatient  
54  
55  
56 140 claims data of all NHI beneficiaries, all hospitals and clinics are required to report to

1  
2  
3  
4 141 the BNHI on a monthly basis. The information obtained from the NHIRD can be  
5  
6  
7 142 considered complete and accurate<sup>23</sup> because the BNHI ensures the accuracy of claims  
8  
9  
10 143 files by performing periodical expert reviews on a random sample for every 50-100  
11  
12  
13 144 ambulatory and inpatient claims. The NHIRD contains data such as patients' age and  
14  
15  
16 145 gender, admission and discharge dates, care location, hospital level, treatment  
17  
18  
19 146 department, surgical procedures, medical expenditures, diagnosis of disease or injury  
20  
21  
22 147 (in accordance with International Classification of Diseases, Ninth Revision Clinical  
23  
24 148 Modification [ICD-9-CM] N-codes), and cause of injury (in accordance with  
25  
26  
27 149 ICD-9-CM E-codes).

28  
29  
30 150 ICD-9-CM N-codes ranging from 800 to 999 that report injury diagnoses were  
31  
32  
33 151 used for extracting injury data. Specifically, the following N-codes were used for  
34  
35  
36 152 extracting head-related injuries: 800, 801, 803, 804, 850-854, 950.1-950.3, 995.55,  
37  
38  
39 153 959.01, 873.0, 873.1, 870, 871, 918, 802, 872, 873.2-873.9. The encrypted personal  
40  
41  
42 154 identification data in the NHIRD were used to link externally the NHIRD dataset to  
43  
44  
45 155 the National Traffic Accident dataset. Patients' identification information that is used  
46  
47  
48 156 for linking the two datasets is encrypted by the Health and Welfare Data Science  
49  
50  
51 157 Center, Taiwan. No individual patient or casualty can be identified and therefore, our  
52  
53  
54 158 study was exempted from review by an institutional review board (IRB #:201409033).

55  
56 159 The flow chart of sample selection from the National Traffic Accident Dataset  
57  
58  
59  
60

1  
2  
3  
4 160 and the NHIRD is presented in supplementary appendix 1. The current research  
5  
6  
7 161 examined data for the period between 2003 and 2012. By linking the National Traffic  
8  
9  
10 162 Accident Dataset and the NHIRD, a total of 4054668 casualties involved in MVCs  
11  
12  
13 163 were identified. Among the 4054668 casualties, 1998606 were motorcyclists and  
14  
15  
16 164 bicyclists involved in MVCs (after excluding missing data such as identification and  
17  
18  
19 165 sex data and remaining cases where victims were treated at different times). After  
20  
21  
22 166 removal of the cases where the individuals involved did not receive an injury  
23  
24  
25 167 diagnosis and where patients died within 24 hours, a total of 1239474 casualties were  
26  
27  
28 168 either hospitalised or admitted to emergency departments. Among these 1239474  
29  
30  
31 169 casualties, 82711 were hospitalised for head-related injuries (treated as cases), and  
32  
33  
34 170 1156763 were hospitalised for other injury types or received emergency treatment  
35  
36  
37 171 only (treated as controls).

38  
39 172

#### 40 41 42 173 *Variable definitions*

43  
44  
45 174 The current study investigates the effects of demographic variables, temporal  
46  
47  
48 175 factors, road and environment characteristics, and crash factors on head injuries  
49  
50  
51 176 among bicyclist and motorcyclist casualties. Demographic data were collected for the  
52  
53  
54 177 casualties, namely gender (male and female); age (four groups: <18, 18-40, 41-64,  
55  
56  
57 178 and 65 or above); blood alcohol consumption (BAC) level ( $\leq 0.03\%$  or  $> 0.03\%$ );

1  
2  
3  
4 179 license status (yes: with a valid license, or no: without a valid license); helmet use  
5  
6  
7 180 (yes or no); and location (highly urbanised area, moderately urbanised area,  
8  
9  
10 181 boomtown, rural area). Vehicle attributes include the engine size ( $\leq 50$ cc and  $\geq 51$ cc  
11  
12 182 or above). Road and environment factors were the following variables: path type  
13  
14 183 (straight road, curved road, or crossroads/roundabout), lighting (daylight, or  
15  
16 184 dusk/dawn); road type (provincial highway, county road, or others); road surface (dry,  
17  
18 185 or wet/slippery); road defect (yes or no); barrier (yes or no); traffic signal (yes or no);  
19  
20  
21 186 separation of traffic direction (yes or no); and traffic island (yes or no). Crash  
22  
23  
24 187 characteristics were the crash type (multiple-vehicle crash or single-vehicle crash) and  
25  
26  
27 188 object type which was divided into fixed objects and unfixed objects.  
28  
29  
30  
31  
32  
33  
34  
35  
36  
37

### 38 190 *Statistical analysis*

39 191 Trend of head-related injuries among two-wheeler riders due to MVCs is  
40  
41 192 compared and the difference in hospitalisation percentages is tested with the  
42  
43  
44 193 Mann-Kendall trend test. Distribution of head-injury related hospitalisation and non  
45  
46  
47 194 head-injury related hospitalisation by a set of variables (e.g., human attributes,  
48  
49  
50 195 environmental factors, and vehicle characteristics) is reported. Chi-square tests are  
51  
52  
53 196 conducted for comparing hospitalised patients (for head-related injuries) with  
54  
55  
56 197 hospitalised ones (for other injuries). Because the dependent variable is binary  
57  
58  
59  
60

1  
2  
3  
4 198 (hospitalisation for head injuries vs. emergency treatment or hospitalisation for other  
5  
6  
7 199 injury types), a logistic regression model was estimated to examine the determinants  
8  
9  
10 200 of hospitalisation for head injuries. A pooled logistic regression model was estimated:  
11  
12  
13 201 the first model of hospitalisation for head injuries included casualty type (bicyclists vs.  
14  
15  
16 202 motorcyclists) as one of the variables. In estimating the models, the variables that  
17  
18  
19 203 have significance level ( $p < 0.2$ ) in the univariate logistic regression models were then  
20  
21  
22 204 incorporated into the multivariate logistic regression models. VIF (variance inflation  
23  
24  
25 205 factor) was conducted to assess multicollinearity among the variables. Only  
26  
27  
28 206 confounding variables were included in the models. Two separate models were  
29  
30  
31 207 employed to examine the determinants of hospitalisation for head injuries by  
32  
33  
34 208 bicyclists and motorcyclists. These two models determined contributory factors that  
35  
36  
37 209 may be different across bicyclist and motorcyclist casualties.

38  
39  
40  
41  
42 210

## 43 211 **Results**

44  
45  
46  
47  
48 212

49  
50  
51 213 We further illustrate the trend of head injuries sustained by motorcyclists and  
52  
53  
54 214 bicyclists who presented to the emergency rooms or were admitted to hospitals (see  
55  
56  
57 215 supplementary appendix 2). The trend of head injuries appeared to steadily decrease  
58  
59  
60 216 among these two groups: the percentage of head injuries decreased from 10.2% and

1  
2  
3  
4 217 16.4% in 2003 to 4.7% and 7.8% in 2012 among motorcyclists and bicyclists,  
5  
6  
7 218 respectively. The decreasing trend was statistically significant according to the  
8  
9  
10 219 Mann-Kendall trend test ( $p < 0.01$ ). Moreover, the risk of sustaining head injuries  
11  
12  
13 220 tended to be higher among bicyclists than among motorcyclists.

14  
15  
16 221 Table 1 lists the N-codes for principal diagnoses of injuries to various body  
17  
18  
19 222 regions resulting in the hospitalisation of motorcyclists and bicyclists. Traumatic brain  
20  
21  
22 223 injury (TBI, 29.3%), lower leg and ankle fracture (12.3%), and shoulder and upper  
23  
24  
25 224 arm fracture (9.4%) were the top three injury types among motorcyclists. Furthermore,  
26  
27  
28 225 TBI (41.4%), lower leg and ankle fracture (10.7%), and forearm and elbow fracture  
29  
30  
31 226 (6.9%) were the top three injury types among bicyclists. The proportion of bicyclists  
32  
33  
34 227 diagnosed to sustain a TBI was higher than that of motorcyclists (41.4% vs. 29.3%).

35  
36 228

37  
38  
39 229

40  
41  
42 230

43  
44  
45 231

46  
47  
48 232

49  
50  
51 233

52  
53  
54 234

55  
56  
57 235

Table 1: N-codes of principal diagnoses for injuries requiring hospitalisation in two-wheeled vehicle crashes

| <u>Total</u>                             |       |      | <u>Motorcyclists</u>                     |       |      | <u>Bicyclists</u>                        |      |      |
|------------------------------------------|-------|------|------------------------------------------|-------|------|------------------------------------------|------|------|
| N-code                                   | N     | %    | N-code                                   | N     | %    | N-code                                   | N    | %    |
| Traumatic brain injury                   | 67464 | 30.0 | Traumatic brain injury                   | 61826 | 29.3 | Traumatic brain injury                   | 5638 | 41.4 |
| Lower leg and ankle fracture             | 27358 | 12.2 | Lower leg and ankle fracture             | 25908 | 12.3 | Lower leg and ankle fracture             | 1450 | 10.7 |
| Shoulder and upper arm fracture          | 20712 | 9.2  | Shoulder and upper arm fracture          | 19839 | 9.4  | Forearm and elbow fracture               | 939  | 6.9  |
| Forearm and elbow fracture               | 16782 | 7.5  | Forearm and elbow fracture               | 15843 | 7.5  | Shoulder and upper arm fracture          | 873  | 6.4  |
| Other head, face, and neck               | 15247 | 6.8  | Other head, face, and neck               | 14526 | 6.9  | Hip fracture                             | 743  | 5.5  |
| Upper leg and thigh fracture             | 10975 | 4.9  | Upper leg and thigh fracture             | 10528 | 5.0  | Other head, face, and neck               | 721  | 5.3  |
| Sternum/ribs/pelvis fracture             | 10888 | 4.8  | Sternum/ribs/pelvis fracture             | 10509 | 5.0  | Spinal fractures                         | 620  | 4.6  |
| Minor injuries: contusions and abrasions | 8640  | 3.8  | Minor injuries: contusions and abrasions | 8160  | 3.9  | Minor injuries: contusions and abrasions | 480  | 3.5  |
| Minor injuries: open wounds              | 7807  | 3.5  | Minor injuries: open wounds              | 7501  | 3.6  | Sternum/ribs/pelvis fracture             | 466  | 3.4  |
| Wrist/hand/finger fracture               | 6411  | 2.9  | Wrist/hand/finger fracture               | 6213  | 2.9  | Upper leg and thigh fracture             | 360  | 2.6  |



1  
2  
3  
4 265 Tables 2-4 summarise the human attributes, environmental factors, and vehicle  
5  
6  
7 266 characteristics of two-wheeler casualties with head-related injuries occurring between  
8  
9  
10 267 2003 and 2012. One of the noteworthy results includes that the proportion of  
11  
12  
13 268 bicyclists hospitalised for head injuries was higher than that of motorcyclists (10.0%  
14  
15  
16 269 vs. 6.5%). Other noteworthy results from Tables 2-4 are not interpreted here for  
17  
18  
19 270 brevity.  
20  
21 271  
22  
23  
24 272  
25  
26  
27 273  
28  
29  
30 274  
31  
32  
33 275  
34  
35  
36 276  
37  
38  
39 277  
40  
41  
42 278  
43  
44  
45 279  
46  
47  
48 280  
49  
50 281  
51  
52  
53  
54  
55  
56  
57  
58  
59  
60

Table 2: Characteristics of inpatients with head injury involved in two-wheeled vehicle crashes

|                               | Two-wheeled vehicles |      |          |      |          | Motorcyclists |      |          |      |          | Bicyclists |      |          |      |          |
|-------------------------------|----------------------|------|----------|------|----------|---------------|------|----------|------|----------|------------|------|----------|------|----------|
|                               | Cases                |      | Controls |      | <i>p</i> | Cases         |      | Controls |      | <i>p</i> | Cases      |      | Controls |      | <i>p</i> |
|                               | n                    | %    | n        | %    |          | n             | %    | n        | %    |          | n          | %    | n        | %    |          |
| Total                         | 82711                | 6.7  | 1156763  | 93.3 |          | 76352         | 6.5  | 1099277  | 93.5 |          | 6359       | 10.0 | 57486    | 90.0 | <0.001   |
| Gender                        |                      |      |          |      |          |               |      |          |      |          |            |      |          |      |          |
| Male                          | 48373                | 7.1  | 634478   | 92.9 | <0.001   | 44706         | 6.9  | 601593   | 93.1 | <0.001   | 3667       | 10.0 | 32885    | 90.0 | 0.523    |
| Female                        | 34338                | 6.2  | 522285   | 93.8 |          | 31646         | 6.0  | 497684   | 94.0 |          | 2692       | 9.9  | 24601    | 90.1 |          |
| Age group (years)             |                      |      |          |      |          |               |      |          |      |          |            |      |          |      |          |
| <18                           | 5123                 | 9.4  | 49354    | 90.6 | <0.001   | 3718          | 10.5 | 31846    | 89.5 | <0.001   | 1405       | 7.4  | 17508    | 92.6 | <0.001   |
| 18-40                         | 38471                | 5.2  | 697198   | 94.8 |          | 37955         | 5.2  | 689948   | 94.8 |          | 516        | 6.6  | 7250     | 93.4 |          |
| 41-64                         | 26380                | 7.9  | 307322   | 92.1 |          | 24659         | 7.8  | 291586   | 92.2 |          | 1721       | 9.9  | 15736    | 90.1 |          |
| 65+                           | 12737                | 11.0 | 102860   | 89.0 |          | 10020         | 10.4 | 85874    | 89.6 |          | 2717       | 13.8 | 16986    | 86.2 |          |
| Location                      |                      |      |          |      |          |               |      |          |      |          |            |      |          |      |          |
| Highly urbanised area         | 8815                 | 3.6  | 237868   | 96.4 | <0.001   | 8218          | 3.5  | 227548   | 96.5 | <0.001   | 597        | 5.5  | 10320    | 94.5 | <0.001   |
| Medium urbanised area         | 23379                | 5.5  | 401279   | 94.5 |          | 21743         | 5.4  | 383541   | 94.6 |          | 1636       | 8.4  | 17738    | 91.6 |          |
| Boomtown                      | 20149                | 7.0  | 268552   | 93.0 |          | 18709         | 6.8  | 255449   | 93.2 |          | 1440       | 9.9  | 13103    | 90.1 |          |
| General township              | 18924                | 9.8  | 174893   | 90.2 |          | 17251         | 9.5  | 163844   | 90.5 |          | 1673       | 13.2 | 11049    | 86.8 |          |
| Rural area                    | 11444                | 13.4 | 73818    | 86.6 |          | 10431         | 13.2 | 68556    | 86.8 |          | 1013       | 16.1 | 5262     | 83.9 |          |
| Motorcycle engine capacity    |                      |      |          |      |          |               |      |          |      |          |            |      |          |      |          |
| ≥51cc                         | 60411                | 6.2  | 907379   | 93.8 | <0.001   | 60411         | 6.2  | 907379   | 93.8 | <0.001   | NA         | NA   | NA       | NA   | NA       |
| ≤50cc                         | 15941                | 7.7  | 191898   | 92.3 |          | 15941         | 7.7  | 191898   | 92.3 |          | NA         | NA   | NA       | NA   |          |
| Drunk Driving                 |                      |      |          |      |          |               |      |          |      |          |            |      |          |      |          |
| No (BAC <sup>a</sup> ≤0.03%)  | 71070                | 6.0  | 1108293  | 94.0 | <0.001   | 64876         | 5.8  | 1051700  | 94.2 | <0.001   | 6194       | 9.9  | 56593    | 90.1 | <0.001   |
| Yes (BAC <sup>a</sup> >0.03%) | 11641                | 19.4 | 48470    | 80.6 |          | 11476         | 19.4 | 47577    | 80.6 |          | 165        | 15.6 | 893      | 84.4 |          |

1  
2  
3  
4  
5  
6  
7  
8  
9  
10  
11  
12  
13  
14  
15  
16  
17  
18  
19  
20  
21  
22  
23  
24  
25  
26  
27  
28  
29  
30  
31  
32  
33  
34  
35  
36  
37  
38  
39  
40  
41  
42  
43  
44  
45  
46  
47  
48  
49

|            |       |      |         |      |        |       |      |         |      |        |      |      |       |      |        |
|------------|-------|------|---------|------|--------|-------|------|---------|------|--------|------|------|-------|------|--------|
| Helmet use |       |      |         |      |        |       |      |         |      |        |      |      |       |      |        |
| Yes        | 63575 | 5.9  | 1011701 | 94.1 | <0.001 | 63158 | 5.9  | 1006568 | 94.1 | <0.001 | 417  | 7.5  | 5133  | 92.5 | <0.001 |
| No         | 19136 | 11.7 | 145062  | 88.3 |        | 13194 | 12.5 | 92709   | 87.5 |        | 5942 | 10.2 | 52353 | 89.8 |        |
| License    |       |      |         |      |        |       |      |         |      |        |      |      |       |      |        |
| Yes        | 57613 | 5.7  | 952109  | 94.3 | <0.001 | 57613 | 5.7  | 952109  | 94.3 | <0.001 | NA   | NA   | NA    | NA   | NA     |
| No         | 16028 | 11.0 | 129169  | 89.0 |        | 16028 | 11.0 | 129169  | 89.0 |        | NA   | NA   | NA    | NA   |        |

<sup>a</sup>BAC: Blood alcohol concentration

For peer review only

Table 3. Environment characteristics of inpatients with head injury involved in two-wheeled vehicle crashes

|                                        | Two-wheeled vehicles |      |          |      |          | Motorcyclists |      |          |      |          | Bicyclists |      |          |      |          |
|----------------------------------------|----------------------|------|----------|------|----------|---------------|------|----------|------|----------|------------|------|----------|------|----------|
|                                        | Cases                |      | Controls |      | <i>p</i> | Cases         |      | Controls |      | <i>p</i> | Cases      |      | Controls |      | <i>p</i> |
|                                        | n                    | %    | n        | %    |          | n             | %    | n        | %    |          | n          | %    | n        | %    |          |
| Path Type                              |                      |      |          |      |          |               |      |          |      |          |            |      |          |      |          |
| Straight road                          | 34581                | 7.9  | 404337   | 92.1 | <0.001   | 31629         | 7.7  | 379675   | 92.3 | <0.001   | 2952       | 10.7 | 24662    | 89.3 | <0.001   |
| Curved road                            | 4344                 | 9.1  | 43312    | 90.9 |          | 4031          | 9.0  | 40950    | 91.0 |          | 313        | 11.7 | 2362     | 88.3 |          |
| Crossroads/Roundabout                  | 43786                | 5.8  | 709114   | 94.2 |          | 40692         | 5.7  | 678652   | 94.3 |          | 3094       | 9.2  | 30462    | 90.8 |          |
| Lighting                               |                      |      |          |      |          |               |      |          |      |          |            |      |          |      |          |
| Daylight                               | 79618                | 6.6  | 1131762  | 93.4 | <0.001   | 73593         | 6.4  | 1076250  | 93.6 | <0.001   | 6025       | 9.8  | 55512    | 90.2 | <0.001   |
| Dusk or dawn                           | 3093                 | 11.0 | 25001    | 89.0 |          | 2759          | 10.7 | 23027    | 89.3 |          | 334        | 14.5 | 1974     | 85.5 |          |
| Road type                              |                      |      |          |      |          |               |      |          |      |          |            |      |          |      |          |
| Provincial Highway                     | 7368                 | 10.5 | 62628    | 89.5 | <0.001   | 6833          | 10.3 | 59461    | 89.7 | <0.001   | 535        | 14.5 | 3167     | 85.5 | <0.001   |
| County road                            | 8923                 | 9.6  | 84422    | 90.4 |          | 8185          | 9.3  | 80043    | 90.7 |          | 738        | 14.4 | 4379     | 85.6 |          |
| Others(Township road/<br>Private road) | 66404                | 6.2  | 1009614  | 93.8 |          | 61318         | 6.0  | 959677   | 94.0 |          | 5086       | 9.2  | 49937    | 90.8 |          |
| Road surface                           |                      |      |          |      |          |               |      |          |      |          |            |      |          |      |          |
| Dry                                    | 74774                | 6.8  | 1024947  | 93.2 | <0.001   | 69030         | 6.6  | 973197   | 93.4 | <0.001   | 5744       | 10.0 | 51750    | 90.0 | 0.482    |
| Wet/Slippery                           | 7937                 | 5.7  | 131816   | 94.3 |          | 7322          | 5.5  | 126080   | 94.5 |          | 615        | 9.7  | 5736     | 90.3 |          |
| Road defect                            |                      |      |          |      |          |               |      |          |      |          |            |      |          |      |          |
| No                                     | 81560                | 6.7  | 1144635  | 93.3 | <0.001   | 75251         | 6.5  | 1087538  | 93.5 | <0.001   | 6309       | 10.0 | 57097    | 90.0 | 0.367    |
| Yes                                    | 1151                 | 8.7  | 12128    | 91.3 |          | 1101          | 8.6  | 11739    | 91.4 |          | 50         | 11.4 | 389      | 88.6 |          |
| Barrier                                |                      |      |          |      |          |               |      |          |      |          |            |      |          |      |          |
| No                                     | 79862                | 6.7  | 1120926  | 93.3 | <0.001   | 73658         | 6.5  | 1065006  | 93.5 | <0.001   | 6204       | 10.0 | 55920    | 90.0 | 0.224    |
| Yes                                    | 2849                 | 7.4  | 35837    | 92.6 |          | 2694          | 7.3  | 34271    | 92.7 |          | 155        | 9.0  | 1566     | 91.0 |          |

1  
2  
3  
4  
5  
6  
7  
8  
9  
10  
11  
12  
13  
14  
15  
16  
17  
18  
19  
20  
21  
22  
23  
24  
25  
26  
27  
28  
29  
30  
31  
32  
33  
34  
35  
36  
37  
38  
39  
40  
41  
42  
43  
44  
45  
46  
47  
48  
49

|                                  |       |     |        |      |        |       |     |        |      |        |      |      |       |      |        |
|----------------------------------|-------|-----|--------|------|--------|-------|-----|--------|------|--------|------|------|-------|------|--------|
| Traffic signal                   |       |     |        |      |        |       |     |        |      |        |      |      |       |      |        |
| Yes                              | 25993 | 5.7 | 434048 | 94.3 | <0.001 | 24265 | 5.5 | 417304 | 94.5 | <0.001 | 1728 | 9.4  | 16744 | 90.6 | 0.003  |
| No                               | 56718 | 7.3 | 722715 | 92.7 |        | 52087 | 7.1 | 681973 | 92.9 |        | 4631 | 10.2 | 40742 | 89.8 |        |
| Separation of traffic directions |       |     |        |      |        |       |     |        |      |        |      |      |       |      |        |
| Yes                              | 48122 | 6.9 | 648417 | 93.1 | <0.001 | 44113 | 6.7 | 613461 | 93.3 | <0.001 | 4009 | 10.3 | 34956 | 89.7 | 0.002  |
| No                               | 34589 | 6.4 | 508346 | 93.6 |        | 32239 | 6.2 | 485816 | 93.8 |        | 2350 | 9.4  | 22530 | 90.6 |        |
| Traffic island                   |       |     |        |      |        |       |     |        |      |        |      |      |       |      |        |
| Yes                              | 25552 | 7.6 | 309424 | 92.4 | <0.001 | 23531 | 7.4 | 293206 | 92.6 | <0.001 | 2021 | 11.1 | 16218 | 88.9 | <0.001 |
| No                               | 57159 | 6.3 | 847339 | 93.7 |        | 52821 | 6.1 | 806071 | 93.9 |        | 4338 | 9.5  | 41268 | 90.5 |        |

Table 4. Crash characteristics of inpatients with head injury involved in two-wheeled vehicle crashes

|                       | Two-wheeled vehicles |      |          |      |          | Motorcyclists |      |          |      |          | Bicyclists |      |          |      |          |
|-----------------------|----------------------|------|----------|------|----------|---------------|------|----------|------|----------|------------|------|----------|------|----------|
|                       | Cases                |      | Controls |      | <i>p</i> | Cases         |      | Controls |      | <i>p</i> | Cases      |      | Controls |      | <i>p</i> |
|                       | n                    | %    | n        | %    |          | n             | %    | n        | %    |          | n          | %    | n        | %    |          |
| Crash type            |                      |      |          |      |          |               |      |          |      |          |            |      |          |      |          |
| Multiple vehicle      | 66457                | 6.0  | 1047128  | 94.0 | <0.001   | 60466         | 5.7  | 991673   | 94.3 | <0.001   | 5991       | 9.8  | 5981.2   | 90.2 | <0.001   |
| Single vehicle        | 16245                | 12.9 | 109635   | 87.1 |          | 15877         | 12.9 | 107604   | 87.1 |          | 368        | 15.3 | 352.7    | 84.7 |          |
| Object type           |                      |      |          |      |          |               |      |          |      |          |            |      |          |      |          |
| Unfixed objects       | 10829                | 11.3 | 84984    | 88.7 | <0.001   | 10542         | 11.2 | 83360    | 88.8 | <0.001   | 287        | 15   | 272      | 85.0 | 0.461    |
| Fixed objects         | 5416                 | 18.0 | 24651    | 82.0 |          | 5335          | 18.0 | 24244    | 82.0 |          | 81         | 16.6 | 64.4     | 83.4 |          |
| Fixed objects         |                      |      |          |      |          |               |      |          |      |          |            |      |          |      |          |
| Buildings/Barriers    | 1574                 | 14.4 | 9381     | 85.6 | <0.001   | 1518          | 14.3 | 9072     | 85.7 | <0.001   | 56         | 15.3 | 40.7     | 84.7 | 0.282    |
| Traffic islands/Trees | 3842                 | 20.1 | 15270    | 79.9 |          | 3817          | 20.1 | 15172    | 79.9 |          | 25         | 20.3 | 4.7      | 79.7 |          |
| /Others               |                      |      |          |      |          |               |      |          |      |          |            |      |          |      |          |
| Unfixed objects       |                      |      |          |      |          |               |      |          |      |          |            |      |          |      |          |
| Animals/Pedestrians   | 2242                 | 7.1  | 29369    | 92.9 | <0.001   | 2230          | 7.1  | 29134    | 92.9 | <0.001   | 12         | 4.9  | 7.1      | 95.1 | <0.001   |
| Skidding vehicle      | 8587                 | 13.4 | 55615    | 86.6 |          | 8312          | 13.3 | 54226    | 86.7 |          | 275        | 16.5 | 258.5    | 83.5 |          |

1  
2  
3  
4 284 Table 5 lists the crude and adjusted odds ratios (ORs) of hospitalisation for head  
5  
6  
7 285 injuries among motorcyclists and bicyclists using logistic regression models. Three  
8  
9  
10 286 models were estimated: a pooled model that considered the variable “vehicle type” as  
11  
12  
13 287 a risk factor and two separate models for motorcyclists and bicyclists. According to  
14  
15  
16 288 the variance inflation factor being <3, there was no need to be concerned about  
17  
18  
19 289 multi-collinearity in the models.

20  
21 290

22  
23 291

24  
25  
26  
27 292

28  
29  
30 293

31  
32  
33 294

34  
35  
36 295

37  
38  
39 296

40  
41  
42 297

43  
44  
45 298

46  
47  
48 299

49  
50 300

51  
52  
53 301  
54  
55  
56  
57  
58  
59  
60

Table 5. Crude and adjusted odds ratios of hospitalisation for head injury in two-wheeled vehicle crashed accidents

|                            | Two-wheeled vehicles |             |             |             | Motorcyclists |             |             |             | Bicyclist   |             |             |             |
|----------------------------|----------------------|-------------|-------------|-------------|---------------|-------------|-------------|-------------|-------------|-------------|-------------|-------------|
|                            | Crude OR             | 95% CI      | Adjusted OR | 95% CI      | Crude OR      | 95% CI      | Adjusted OR | 95% CI      | Crude OR    | 95% CI      | Adjusted OR | 95% CI      |
| Vehicle type               |                      |             |             |             |               |             |             |             |             |             |             |             |
| Motorcycle                 | 1.00 (ref.)          |             | 1.00 (ref.) |             | ---           |             | ---         |             | ---         |             | ---         |             |
| Bicycle                    | 1.59*                | 1.55 - 1.64 | 0.82*       | 0.79 - 0.85 |               |             |             |             |             |             |             |             |
| Gender                     |                      |             |             |             |               |             |             |             |             |             |             |             |
| Male                       | 1.00 (ref.)          |             | 1.00 (ref.) |             | 1.00 (ref.)   |             | 1.00 (ref.) |             | 1.00 (ref.) |             | 1.00 (ref.) |             |
| Female                     | 0.86*                | 0.85 - 0.88 | 1.08*       | 1.07 - 1.10 | 0.86*         | 0.84 - 0.87 | 1.03*       | 1.02 - 1.05 | 0.98        | 0.93 - 1.03 | 1.01        | 0.95 - 1.06 |
| Age(year)                  |                      |             |             |             |               |             |             |             |             |             |             |             |
| <18                        | 0.57*                | 0.57 - 0.58 | 0.62*       | 0.60 - 0.64 | 0.59*         | 0.58 - 0.60 | 0.71*       | 0.68 - 0.74 | 0.61*       | 0.56 - 0.67 | 0.86*       | 0.77 - 0.96 |
| 18-40                      | 1.00 (ref.)          |             | 1.00 (ref.) |             | 1.00 (ref.)   |             | 1.00 (ref.) |             | 1.00 (ref.) |             | 1.00 (ref.) |             |
| 41-64                      | 1.29*                | 1.28 - 1.31 | 0.86*       | 0.83 - 0.89 | 1.32*         | 1.30 - 1.34 | 0.93*       | 0.89 - 0.97 | 0.98        | 0.93 - 1.04 | 1.40*       | 1.29 - 1.51 |
| 65+                        | 1.87*                | 1.83 - 1.90 | 1.23*       | 1.19 - 1.28 | 1.78*         | 1.74 - 1.82 | 1.23*       | 1.18 - 1.29 | 1.78*       | 1.69 - 1.88 | 1.92*       | 1.80 - 2.06 |
| Location                   |                      |             |             |             |               |             |             |             |             |             |             |             |
| Highly urbanised area      | 1.00 (ref.)          |             | 1.00 (ref.) |             | 1.00 (ref.)   |             | 1.00 (ref.) |             | 1.00 (ref.) |             | 1.00 (ref.) |             |
| Medium urbanised area      | 0.74*                | 0.73 - 0.75 | 1.49*       | 1.45 - 1.53 | 0.74*         | 0.73 - 0.76 | 1.51*       | 1.47 - 1.55 | 0.78*       | 0.73 - 0.82 | 1.60*       | 1.45 - 1.76 |
| Boomtown                   | 1.07*                | 1.05 - 1.08 | 1.78*       | 1.73 - 1.83 | 1.07*         | 1.05 - 1.09 | 1.81*       | 1.76 - 1.86 | 0.99        | 0.93 - 1.06 | 1.89*       | 1.70 - 2.09 |
| General township           | 1.67*                | 1.64 - 1.70 | 2.31*       | 2.25 - 2.38 | 1.67*         | 1.64 - 1.70 | 2.37*       | 2.30 - 2.44 | 1.50*       | 1.41 - 1.59 | 2.42*       | 2.18 - 2.68 |
| Rural area                 | 2.36*                | 2.31 - 2.41 | 2.74*       | 2.66 - 2.83 | 2.38*         | 2.33 - 2.43 | 2.77*       | 2.68 - 2.87 | 1.88*       | 1.75 - 2.02 | 2.94*       | 2.63 - 3.29 |
| Motorcycle engine capacity |                      |             |             |             |               |             |             |             |             |             |             |             |
| ≥51cc                      | ---                  |             | ---         |             | 1.00 (ref.)   |             | 1.00 (ref.) |             | ---         |             | ---         |             |
| ≤50cc                      |                      |             |             |             | 1.25*         | 1.23 - 1.27 | 1.18*       | 1.15 - 1.20 |             |             |             |             |



|                                     | Two-wheeled vehicles |             |             |             | Motorcyclists |             |             |             | Bicyclist   |             |             |             |
|-------------------------------------|----------------------|-------------|-------------|-------------|---------------|-------------|-------------|-------------|-------------|-------------|-------------|-------------|
|                                     | Crude OR             | 95% CI      | Adjusted OR | 95% CI      | Crude OR      | 95% CI      | Adjusted OR | 95% CI      | Crude OR    | 95% CI      | Adjusted OR | 95% CI      |
| Drunk driving                       |                      |             |             |             |               |             |             |             |             |             |             |             |
| No (BAC <sup>a</sup> ≤0.03%)        | 1.00 (ref.)          |             | 1.00 (ref.) |             | 1.00 (ref.)   |             | 1.00 (ref.) |             | 1.00 (ref.) |             | 1.00 (ref.) |             |
| Yes (BAC <sup>a</sup> >0.03%)       | 3.75*                | 3.67 - 3.83 | 2.80*       | 2.73 - 2.87 | 3.91*         | 3.83 - 4.00 | 2.64*       | 2.58 - 2.71 | 1.69*       | 1.43 - 2.00 | 1.47*       | 1.23 - 1.75 |
| Helmet use                          |                      |             |             |             |               |             |             |             |             |             |             |             |
| Yes                                 | 1.00 (ref.)          |             | 1.00 (ref.) |             | 1.00 (ref.)   |             | 1.00 (ref.) |             | 1.00 (ref.) |             | 1.00 (ref.) |             |
| No                                  | 2.10*                | 2.06 - 2.14 | 1.77*       | 1.74 - 1.81 | 2.27*         | 2.22 - 2.31 | 1.73*       | 1.69 - 1.77 | 1.40*       | 1.26 - 1.55 | 1.24*       | 1.12 - 1.38 |
| License                             |                      |             |             |             |               |             |             |             |             |             |             |             |
| Yes                                 | ---                  |             | ---         |             | 1.00 (ref.)   |             | 1.00 (ref.) |             | ---         |             | ---         |             |
| No                                  |                      |             |             |             | 2.05*         | 2.01 - 2.09 | 1.36*       | 1.33 - 1.39 |             |             |             |             |
| Path type                           |                      |             |             |             |               |             |             |             |             |             |             |             |
| Straight road                       | 1.00 (ref.)          |             | 1.00 (ref.) |             | 1.00 (ref.)   |             | 1.00 (ref.) |             | 1.00 (ref.) |             | 1.00 (ref.) |             |
| Curved road                         | 1.43*                | 1.38 - 1.47 | 1.01        | 0.98 - 1.05 | 1.44*         | 1.39 - 1.49 | 1.00        | 0.96 - 1.03 | 1.21*       | 1.07 - 1.36 | 1.16*       | 1.03 - 1.32 |
| Crossroads/Roundabout               | 0.71*                | 0.70 - 0.72 | 0.90*       | 0.88 - 0.92 | 0.71*         | 0.70 - 0.72 | 0.90*       | 0.88 - 0.92 | 0.84*       | 0.80 - 0.89 | 0.94        | 0.87 - 1.00 |
| Lighting                            |                      |             |             |             |               |             |             |             |             |             |             |             |
| Daylight                            | 1.00 (ref.)          |             | 1.00 (ref.) |             | 1.00 (ref.)   |             | 1.00 (ref.) |             | 1.00 (ref.) |             | 1.00 (ref.) |             |
| Dusk or dawn                        | 1.76*                | 1.69 - 1.83 | 1.08*       | 1.03 - 1.12 | 1.75*         | 1.68 - 1.82 | 1.05*       | 1.00 - 1.09 | 1.56*       | 1.38 - 1.76 | 1.28*       | 1.13 - 1.45 |
| Road type                           |                      |             |             |             |               |             |             |             |             |             |             |             |
| Provincial highway                  | 1.00 (ref.)          |             | 1.00 (ref.) |             | 1.00 (ref.)   |             | 1.00 (ref.) |             | 1.00 (ref.) |             | 1.00 (ref.) |             |
| County road                         | 1.54*                | 1.50 - 1.57 | 0.98        | 0.94 - 1.01 | 1.53*         | 1.49 - 1.57 | 0.97        | 0.93 - 1.00 | 1.59*       | 1.47 - 1.73 | 1.06        | 0.94 - 1.20 |
| Others (Township road/Private road) | 0.59*                | 0.58 - 0.60 | 0.83*       | 0.81 - 0.85 | 0.59*         | 0.58 - 0.61 | 0.82*       | 0.80 - 0.85 | 0.60*       | 0.57 - 0.65 | 0.85*       | 0.77 - 0.94 |
| Road surface                        |                      |             |             |             |               |             |             |             |             |             |             |             |

|                                  | Two-wheeled vehicles |             |             |             | Motorcyclists |             |             |             | Bicyclist   |             |             |             |
|----------------------------------|----------------------|-------------|-------------|-------------|---------------|-------------|-------------|-------------|-------------|-------------|-------------|-------------|
|                                  | Crude OR             | 95% CI      | Adjusted OR | 95% CI      | Crude OR      | 95% CI      | Adjusted OR | 95% CI      | Crude OR    | 95% CI      | Adjusted OR | 95% CI      |
| Dry                              | 1.00 (ref.)          |             | 1.00 (ref.) |             | 1.00 (ref.)   |             | 1.00 (ref.) |             | 1.00 (ref.) |             | 1.00 (ref.) |             |
| Wet/Slippery                     | 0.83*                | 0.81 - 0.85 | 0.85*       | 0.83 - 0.87 | 0.82*         | 0.80 - 0.84 | 0.84*       | 0.81 - 0.86 | 0.97        | 0.89 - 1.06 | 1.01        | 0.93 - 1.11 |
| Road defect                      |                      |             |             |             |               |             |             |             |             |             |             |             |
| No                               | 1.00 (ref.)          |             | 1.00 (ref.) |             | 1.00 (ref.)   |             | 1.00 (ref.) |             | 1.00 (ref.) |             | 1.00 (ref.) |             |
| Yes                              | 1.33*                | 1.25 - 1.42 | 0.95        | 0.89 - 1.01 | 1.36*         | 1.28 - 1.44 | 0.96        | 0.90 - 1.03 | 1.16        | 0.87 - 1.56 | 1.00        | 0.74 - 1.36 |
| Barrier                          |                      |             |             |             |               |             |             |             |             |             |             |             |
| No                               | 1.00 (ref.)          |             | 1.00 (ref.) |             | 1.00 (ref.)   |             | 1.00 (ref.) |             | 1.00 (ref.) |             | 1.00 (ref.) |             |
| Yes                              | 1.12*                | 1.07 - 1.16 | 0.99        | 0.95 - 1.03 | 1.14*         | 1.09 - 1.18 | 0.99        | 0.95 - 1.03 | 0.89        | 0.76 - 1.05 | 0.92        | 0.78 - 1.09 |
| Traffic signal                   |                      |             |             |             |               |             |             |             |             |             |             |             |
| Yes                              | 1.00 (ref.)          |             | 1.00 (ref.) |             | 1.00 (ref.)   |             | 1.00 (ref.) |             | 1.00 (ref.) |             | 1.00 (ref.) |             |
| No                               | 1.31*                | 1.29 - 1.33 | 1.02        | 1.00 - 1.04 | 1.31*         | 1.29 - 1.33 | 1.03*       | 1.01 - 1.05 | 1.10*       | 1.04 - 1.17 | 0.93        | 0.87 - 1.00 |
| Separation of traffic directions |                      |             |             |             |               |             |             |             |             |             |             |             |
| Yes                              | 1.00 (ref.)          |             | 1.00 (ref.) |             | 1.00 (ref.)   |             | 1.00 (ref.) |             | 1.00 (ref.) |             | 1.00 (ref.) |             |
| No                               | 0.92*                | 0.90 - 0.93 | 1.21*       | 1.19 - 1.24 | 0.92*         | 0.91 - 0.94 | 1.21*       | 1.19 - 1.23 | 0.91*       | 0.86 - 0.96 | 1.09*       | 1.02 - 1.16 |
| Traffic island                   |                      |             |             |             |               |             |             |             |             |             |             |             |
| Yes                              | 1.00 (ref.)          |             | 1.00 (ref.) |             | 1.00 (ref.)   |             | 1.00 (ref.) |             | 1.00 (ref.) |             | 1.00 (ref.) |             |
| No                               | 0.82*                | 0.80 - 0.83 | 0.74*       | 0.73 - 0.76 | 0.82*         | 0.80 - 0.83 | 0.74*       | 0.73 - 0.76 | 0.84*       | 0.80 - 0.89 | 0.80*       | 0.75 - 0.86 |
| Crash type                       |                      |             |             |             |               |             |             |             |             |             |             |             |
| Multiple vehicle                 | 1.00 (ref.)          |             | 1.00 (ref.) |             | 1.00 (ref.)   |             | 1.00 (ref.) |             | 1.00 (ref.) |             | 1.00 (ref.) |             |
| Single vehicle                   | 2.34*                | 2.29 - 2.38 | 1.75*       | 1.71 - 1.79 | 2.42*         | 2.38 - 2.47 | 1.76*       | 1.72 - 1.79 | 1.68*       | 1.50 - 1.88 | 1.56*       | 1.38 - 1.76 |

<sup>a</sup>BAC: Blood alcohol concentration

1  
2  
3  
4 303 The pooled model revealed that bicyclists were 18% significantly less likely to be  
5  
6  
7 304 hospitalised for head injuries than motorcyclists were (AOR=0.82; CI=0.79-0.85). Moreover,  
8  
9  
10 305 factors such as the female (AOR=1.08, CI=1.07-1.10), age 65 or above (AOR=1.23,  
11  
12 306 CI=1.19-1.28), rural areas (AOR=2.74, CI=2.66-2.83), BAC level>0.03% (AOR=2.80,  
13  
14  
15 307 CI=2.73-2.87), no use of a helmet (AOR=1.77, CI=1.74-1.81), darkness (AOR=1.08,  
16  
17  
18 308 CI=1.03-1.12), no separator of divided traffic direction (AOR=1.21, CI=1.19-1.24), and  
19  
20  
21 309 single-vehicle crash (AOR=1.75, CI=1.71-1.79) were found to be the most significantly  
22  
23  
24 310 associated with hospitalisation for head injuries.

25  
26  
27 311 The estimated crude and adjusted ORs (AORs) of the two separate models evaluating  
28  
29  
30 312 factors contributing to the hospitalisation of motorcyclists and bicyclists for head injuries  
31  
32  
33 313 were similar to those of the pooled model. Noteworthy results include that female  
34  
35  
36 314 motorcyclists (AOR=1.03) and elderly motorcyclists and bicyclists (AORs=1.23 and 1.92,  
37  
38  
39 315 respectively) were more likely to be hospitalised for head injuries. Accidents that occurred in  
40  
41  
42 316 rural areas were associated with a higher risk of hospitalisation for head injuries among  
43  
44  
45 317 motorcyclists and bicyclists (AORs=2.77 and 2.94, respectively). The odds of hospitalisation  
46  
47  
48 318 were higher in riders of mopeds who sustained head injuries than in heavy-motorcycles riders  
49  
50  
51 319 (AOR=1.18). Intoxicated motorcyclists and bicyclists had a higher risk of hospitalisation for  
52  
53  
54 320 head injuries (AORs=1.48 and 2.64, respectively). Riding without helmets was found to be a  
55  
56  
57 321 risk factor in both motorcyclists and bicyclists (AORs=1.73 and 1.24, respectively).

1  
2  
3  
4 322 Motorcyclists travelling without a legal licence were more prone to be hospitalised for head  
5  
6  
7 323 injuries (AOR=1.36). Furthermore, curved roadways and dusk or dawn were associated with  
8  
9  
10 324 an increased risks of hospitalisation for head injuries among bicyclists (AORs=1.16 and 1.28,  
11  
12  
13 325 respectively).

14  
15 326 The risk of hospitalisation for head injuries was higher among motorcyclists and  
16  
17  
18 327 bicyclists involved in MVCs that occurred on roadways without separation of traffic direction  
19  
20  
21 328 (AORs=1.21 and 1.09, respectively). Moreover, the risk of hospitalisation for head injuries  
22  
23  
24 329 was 76% and 56% (AORs=1.76 and 1.56, respectively) higher in motorcyclists and bicyclists  
25  
26  
27 330 involved in single-vehicle crashes than in those involved in multi-vehicle crashes.

28  
29  
30 331

## 31 32 332 **Discussions**

33  
34  
35 333

36  
37  
38 334 To ascertain the research hypotheses, the univariate results suggest that compared with  
39  
40  
41 335 motorcyclists, bicyclists sustaining head injuries were 59% more likely to be hospitalised.  
42  
43  
44 336 However, the results of multivariate logistic models revealed that compared with  
45  
46  
47 337 motorcyclists, bicyclists who sustained head injuries had an 18% decreased probability of  
48  
49  
50 338 being hospitalised. After the adjustment of this result for other factors, helmet use appeared to  
51  
52  
53 339 be beneficial in reducing the risks of hospitalisation for head injuries among bicyclists.

54  
55  
56 340 The National Traffic Accident Dataset and the NHIRD are both national datasets that cover  
57  
58  
59  
60

1  
2  
3  
4 341 99.9% of populations. This is a comprehensive study using the linked data from these two  
5  
6  
7 342 datasets which facilitate the determination of various factors associated with an increased risk  
8  
9  
10 343 of hospitalisation for head injuries among motorcyclists and bicyclists in Taiwan. The  
11  
12 344 conclusions drawn from the current research can therefore be more reliable than other studies  
13  
14  
15 345 that solely used a single dataset.  
16  
17

18 346 The current research is limited by the fact that death data are not explicitly recorded in the  
19  
20  
21 347 NHIRD. Patients would die even if they are hospitalised. Unfortunately no such data is  
22  
23  
24 348 available from the NHIRD – these patients are recorded as “hospitalisation” instead of  
25  
26  
27 349 “deaths”. Future research may attempt to obtain death data that are unavailable from the  
28  
29  
30 350 NHIRD, which would open up additional analysis possibilities and allow more precise model  
31  
32  
33 351 estimation.  
34  
35

36 352 Compared with motorcyclists, bicyclists sustaining head injuries were found to have higher  
37  
38  
39 353 risks of hospitalisation; however, after the adjustment of this result for other factors in the  
40  
41  
42 354 multivariate analysis, bicyclists have lower risks of hospitalisation. The results here have  
43  
44  
45 355 important implications for policymakers. In 2016, bicycle helmet use became compulsory for  
46  
47  
48 356 electric bicycle users but not for traditional bicycle users in Taiwan. A large-scale nationwide  
49  
50  
51 357 travel survey<sup>24</sup> reported that helmet use was relatively lower among bicyclists (6.8%) than  
52  
53  
54 358 among motorcyclists (82.2%). Because the use of electric bicycles (with higher velocities that  
55  
56  
57 359 may exacerbate crash impacts and injury outcomes) and racing bikes (which have been widely  
58  
59  
60

1  
2  
3  
4 360 used for recreational purpose and travelling between cities) has been increasing in recent  
5  
6  
7 361 years, the government should consider encouraging helmets for all bicycles. Further research  
8  
9  
10 362 can therefore be conducted once bicycle helmet use becomes more popular.

11  
12 363 In this study, two additional logistic models for motorcyclists and bicyclists were  
13  
14  
15 364 estimated. The results revealed that contributory factors to hospitalisation for head injuries are  
16  
17  
18 365 similar among motorcyclists and bicyclists. For instance, dusk or dawn was associated with a  
19  
20  
21 366 higher risk of hospitalisation for head injuries among motorcyclists and bicyclists. The result  
22  
23  
24 367 here adds to existing literature of motorcycle and bicycle road safety by concluding that  
25  
26  
27 368 diminished light conditions are associated not only with accident occurrence<sup>25 26</sup> but also with  
28  
29  
30 369 head injury-related hospitalisation. It seems clear here that enhancing conspicuity, in  
31  
32  
33 370 particular in diminished light conditions, may be an effective countermeasure to reduce both  
34  
35  
36 371 accident risk and its consequences.

37  
38 372 Our regression models revealed that the risk of hospitalisation is higher among elderly  
39  
40  
41 373 motorcyclists and bicyclists who sustained head injuries. Such a finding is in agreement with  
42  
43  
44 374 that of Ekman et al. (2001)<sup>27</sup>, who reported that the risk of head injuries is higher among  
45  
46  
47 375 elderly bicyclists than their younger counterparts. This may be attributable to the fact that  
48  
49  
50 376 compared with young people, elderly people tend to have more chronic diseases and can have  
51  
52  
53 377 more complications after head injuries, and the hospitalisation rates of elderly people can be  
54  
55  
56 378 higher after an accident<sup>28 29</sup>.

1  
2  
3  
4 379 The risk of head injury-related hospitalisation was higher among motorcyclists and  
5  
6  
7 380 bicyclists involved in single-vehicle crashes. This finding may be attributable to higher crash  
8  
9  
10 381 velocities being common in single-vehicle crashes<sup>30</sup>, and helmet use being less common in  
11  
12 382 rural areas where single-vehicle crashes usually occur<sup>31</sup>. Speed management schemes that  
13  
14  
15 383 target all motorised vehicles in general and motorcycles and bicycles (e.g., electric bicycles  
16  
17  
18 384 that now in general may travel at more than 25 km/h<sup>32</sup>) in particular may constitute effective  
19  
20  
21 385 countermeasures for reducing hospitalisation rates for head injuries.  
22  
23

24 386 Head injury-related hospitalisation was found to be associated with accidents that  
25  
26  
27 387 occurred in rural areas. This may be because of increasing kinetic energy and greater impact  
28  
29  
30 388 at higher speeds in rural settings<sup>33 34</sup>. In addition, heads are more likely to be exposed without  
31  
32  
33 389 any protection as a result of helmets being less commonly used in rural areas. Such a  
34  
35  
36 390 conjecture is supported by the findings of past studies<sup>35</sup> on motorcycle helmet use that  
37  
38  
39 391 concluded that compared with riders in cities, riders in rural areas were 7 times less likely to  
40  
41  
42 392 wear helmets. In addition, a national survey administrated by the HPA<sup>24</sup> reported that the  
43  
44  
45 393 bicycle helmet use rate in urbanised areas was 1.5 times higher than that in rural areas.  
46  
47  
48 394 Moreover, the requirement of additional time for emergency-vehicle response in rural areas  
49  
50  
51 395 and the lower availability of medical resources in such areas<sup>36</sup> predispose people with head  
52  
53  
54 396 injuries to hospitalisation.

55  
56 397 The study results revealed that the risk of hospitalisation was higher in both motorcyclists  
57  
58  
59  
60

1  
2  
3  
4 398 and bicyclists who sustained injuries in MVCs on roadways where traffic directions were not  
5  
6  
7 399 separated. This may be because of higher crash velocities at such locations. The road sections  
8  
9  
10 400 may be wide, and speed limits may be higher for locations where the traffic is not divided by  
11  
12  
13 401 any traffic barrier. Therefore, head injuries resulting from accidents in these locations may  
14  
15  
16 402 require hospitalisation.

17  
18 403 Unanswered questions remained in the current research include what other factors may  
19  
20  
21 404 affect hospitalisation due to head injuries among motorcyclists and cyclists. Future research  
22  
23  
24 405 may attempt to obtain these variables that are not available from the National Traffic Accident  
25  
26  
27 406 Dataset and the NHIRD. These factors include motorcycle and bicycle types (a greater  
28  
29  
30 407 classification of engine size and electric bicycles), traffic volume, geometric characteristics,  
31  
32  
33 408 and electronic device use (e.g., phone and MP3 players) that have been increasingly used  
34  
35  
36 409 when riding.

#### 37 38 410 **Acknowledgements:**

39  
40  
41 411 Pai CW contributes to data analysis, interpretation of the data, and final approval of the  
42  
43  
44 412 version to be published.

45  
46  
47 413 Chen YC contributes to data analysis, and final approval of the version to be published.

48  
49  
50 414 Lin HY contributes to the design of the work, data analysis, interpretation of the data, drafting  
51  
52  
53 415 the manuscript and final approval of the version to be published.

54  
55  
56 416 Chen PL contributes to the design of the work, data analysis, interpretation of the data,



1  
2  
3  
4 417 drafting the manuscript and final approval of the version to be published.  
5  
6

7 418 The authors declare to have no conflict of interests.  
8  
9

10 419 This study was supported by a grant from the Health Promotion Administration, Ministry of  
11  
12 420 Health and Welfare, Executive Yuan, Taiwan (Grant number: E1030909-104).  
13  
14

15 421 The data sources used in the present study were the National Traffic Accident Dataset and the  
16  
17  
18 422 National Health Insurance Research Database (NHIRD) from the Health and Welfare Data  
19  
20  
21 423 Science Center, Ministry of Health and Welfare, Taiwan.  
22  
23

24 424 The National Traffic Accident Dataset and the National Health Insurance Research Database  
25  
26  
27 425 (NHIRD), which are open to the researchers in Taiwan, are available from the Health and  
28  
29  
30 426 Welfare Data Science Center (<http://dep.mohw.gov.tw/DOS/np-2497-113.html>). Only citizens  
31  
32  
33 427 of Taiwan who fulfill the requirements of conducting research projects are eligible to apply  
34  
35  
36 428 for the NHIRD and National Traffic Accident Dataset. The use of NHIRD and National  
37  
38  
39 429 Traffic Accident Dataset are limited to research purposes only. Applicants must follow the  
40  
41  
42 430 Computer-Processed Personal Data Protection Law.  
43  
44  
45 431

432 **Reference**

433

- 434 1. Depreitere B, Van Lierde C, Maene S, et al. Bicycle-related head injury: a study of 86  
435 cases. *Accident Analysis & Prevention* 2004;36(4):561-67.
- 436 2. Mayrose J. The effects of a mandatory motorcycle helmet law on helmet use and injury  
437 patterns among motorcyclist fatalities. *Journal of Safety Research* 2008;39(4):429-32.
- 438 3. Wiznia DH, Kim C-Y, Dai F, et al. The effect of helmets on motorcycle outcomes in a  
439 Level I trauma center in Connecticut. *Traffic injury prevention* 2016;17(6):633-37.
- 440 4. Chen PL. Statistics for injury surveillance: Health Promotion Administration, Ministry of  
441 Health and Welfare, 2015.
- 442 5. Ministry of Transportation and Communications. Traffic statistics of year 2014. In:  
443 Ministry of Transportation and Communications T, Republic of China., ed., 2015.
- 444 6. Chiu W-T, Chu S-F, Chang C-K, et al. Implementation of a motorcycle helmet law in  
445 Taiwan and traffic deaths over 18 years. *JAMA* 2011;306(3):267-68.
- 446 7. Ichikawa M, Chadbunchachai W, Marui E. Effect of the helmet act for motorcyclists in  
447 Thailand. *Accident Analysis & Prevention* 2003;35(2):183-89.
- 448 8. Supramaniam V, van Belle G, Sung JF. Fatal motorcycle accidents and helmet laws in  
449 peninsular Malaysia. *Accident Analysis & Prevention* 1984;16(3):157-62.
- 450 9. Passmore J, Tu NTH, Luong MA, et al. Impact of mandatory motorcycle helmet wearing  
451 legislation on head injuries in Viet Nam: results of a preliminary analysis. *Traffic  
452 injury prevention* 2010;11(2):202-06.
- 453 10. Servadei F, Begliomini C, Gardini E, et al. Effect of Italy's motorcycle helmet law on  
454 traumatic brain injuries. *Injury prevention* 2003;9(3):257-60.
- 455 11. Amoros E, Chiron M, Martin J-L, et al. Bicycle helmet wearing and the risk of head, face,  
456 and neck injury: a French case-control study based on a road trauma registry. *Injury  
457 Prevention* 2011;ip. 2011.031815.
- 458 12. Attewell RG, Glase K, McFadden M. Bicycle helmet efficacy: a meta-analysis. *Accident  
459 Analysis & Prevention* 2001;33(3):345-52.
- 460 13. Clarke CF. Evaluation of New Zealand's bicycle helmet law. *The New Zealand Medical  
461 Journal (Online)* 2012;125(1349)
- 462 14. Macpherson A, Spinks A. Bicycle helmet legislation for the uptake of helmet use and  
463 prevention of head injuries (Review). *Cochrane Database of Systematic Reviews*  
464 2007;2
- 465 15. Dennis J, Potter B, Ramsay T, et al. The effects of provincial bicycle helmet legislation on  
466 helmet use and bicycle ridership in Canada. *Injury Prevention* 2010;16(4):219-24.
- 467 16. Walter SR, Olivier J, Churches T, et al. The impact of compulsory cycle helmet legislation  
468 on cyclist head injuries in New South Wales, Australia. *Accident Analysis &*

- 1  
2  
3 469 *Prevention* 2011;43(6):2064-71.
- 4 470 17. Bambach MR, Mitchell R, Grzebieta RH, et al. The effectiveness of helmets in bicycle  
5 471 collisions with motor vehicles: A case-control study. *Accident Analysis & Prevention*  
6 472 2013;53:78-88.
- 7  
8 473 18. Olofsson E, Bunketorp O, Andersson A-L. Helmet use and injuries in children's bicycle  
9 474 crashes in the Gothenburg region. *Safety Science* 2017;92:311-17.
- 10 475 19. Bonander C, Nilson F, Andersson R. The effect of the Swedish bicycle helmet law for  
11 476 children: an interrupted time series study. *Journal of safety research* 2014;51:15-22.
- 12 477 20. Povey LJ, Frith W, Graham P. Cycle helmet effectiveness in New Zealand. *Accident*  
13 478 *Analysis & Prevention* 1999;31(6):763-70.
- 14 479 21. Scuffham P, Alsop J, Cryer C, et al. Head injuries to bicyclists and the New Zealand  
15 480 bicycle helmet law. *Accident Analysis & Prevention* 2000;32(4):565-73.
- 16 481 22. Chen PL, Jou RC, Saleh W, et al. Accidents involving pedestrians with their backs to  
17 482 traffic or facing traffic: an evaluation of crash characteristics and injuries. *Journal of*  
18 483 *Advanced Transportation* 2016;50(5):736-51.
- 19 484 23. Sun Y, Chang Y-H, Chen H-F, et al. Risk of Parkinson disease onset in patients with  
20 485 diabetes. *Diabetes care* 2012;35(5):1047-49.
- 21 486 24. Administration) HHP. Nation Health Interview Survey 2013. In: Health Promotion  
22 487 Administration MoHaW, ed., 2013.
- 23 488 25. Pai C-W. Motorcycle right-of-way accidents—A literature review. *Accident Analysis &*  
24 489 *Prevention* 2011;43(3):971-82.
- 25 490 26. Wood JM, Tyrrell RA, Marszalek R, et al. Bicyclists overestimate their own night-time  
26 491 conspicuity and underestimate the benefits of retroreflective markers on the moveable  
27 492 joints. *Accident Analysis & Prevention* 2013;55:48-53.
- 28 493 27. Ekman R, Welander G, Svanström L, et al. Bicycle-related injuries among the elderly—a  
29 494 new epidemic? *Public Health* 2001;115(1):38-43.
- 30 495 28. Cook LJ, Knight S, Olson LM, et al. Motor vehicle crash characteristics and medical  
31 496 outcomes among older drivers in Utah, 1992-1995. *Annals of emergency medicine*  
32 497 2000;35(6):585-91.
- 33 498 29. Rakotonirainy A, Steinhardt D, Delhomme P, et al. Older drivers' crashes in Queensland,  
34 499 Australia. *Accident Analysis & Prevention* 2012;48:423-29.
- 35 500 30. Clabaux N, Brenac T, Perrin C, et al. Motorcyclists' speed and "looked-but-failed-to-see"  
36 501 accidents. *Accident Analysis & Prevention* 2012;49:73-77.
- 37 502 31. Russo BJ, Barrette TP, Morden J, et al. Examination of factors associated with use rates  
38 503 after transition from a universal to partial motorcycle helmet use law. *Traffic Injury*  
39 504 *Prevention* 2017;18(1):95-101.
- 40 505 32. Langford BC, Chen J, Cherry CR. Risky riding: Naturalistic methods comparing safety  
41 506 behavior from conventional bicycle riders and electric bike riders. *Accident Analysis*  
42 507 *& Prevention* 2015;82:220-26.

- 1  
2  
3 508 33. Pai C-W, Saleh W. Exploring motorcyclist injury severity in approach-turn collisions at  
4 509 T-junctions: Focusing on the effects of driver's failure to yield and junction control  
5 510 measures. *Accident Analysis & Prevention* 2008;40(2):479-86.  
6  
7 511 34. Broughton J. Car occupant and motorcyclist deaths, 1994-20022005.  
8  
9 512 35. Akaateba MA, Amoh-Gyimah R, Yakubu I. A cross-sectional observational study of  
10 513 helmet use among motorcyclists in Wa, Ghana. *Accident Analysis & Prevention*  
11 514 2014;64:18-22.  
12  
13 515 36. Noland R, Quddus M. Analysis of pedestrian and bicycle casualties with regional panel  
14 516 data. *Transportation Research Record: Journal of the Transportation Research Board*  
15 517 2004(1897):28-33.  
16  
17  
18  
19  
20  
21  
22  
23  
24  
25  
26  
27  
28  
29  
30  
31  
32  
33  
34  
35  
36  
37  
38  
39  
40  
41  
42  
43  
44  
45  
46  
47  
48  
49  
50  
51  
52  
53  
54  
55  
56  
57  
58  
59  
60

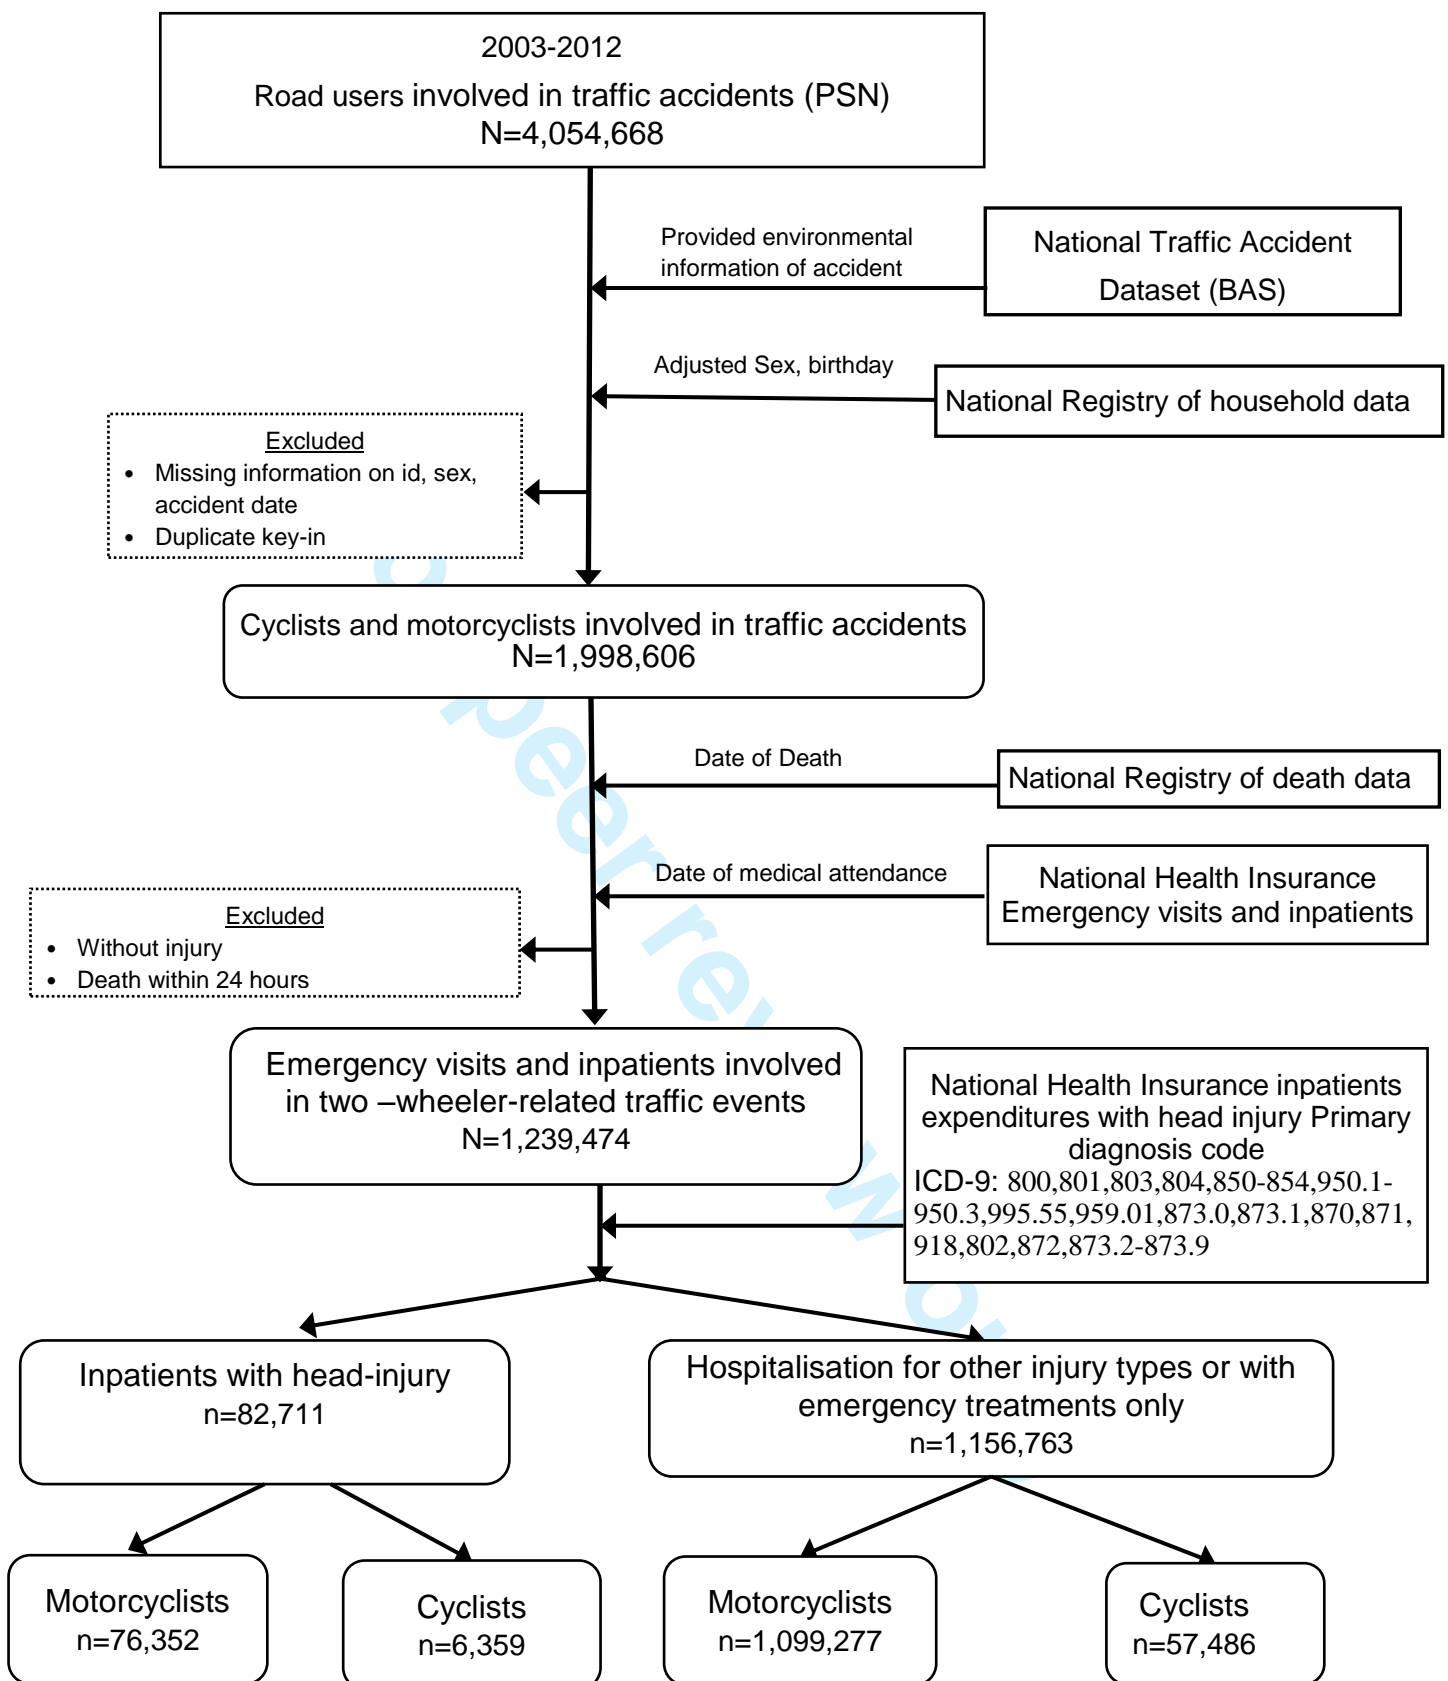

Appendix 1. Study flow diagram



Appendix 2. Trend of head injuries among two-wheeler riders involved in all emergency and inpatient visits for two-wheeler traffic accidents.

<sup>a</sup> :significantly decreasing according to the Mann-Kendall trend test

## STROBE Statement—checklist of items that should be included in reports of observational studies

|                           | Item No | Recommendation                                                                                                                                                                                                                                                                                                      | Page  |
|---------------------------|---------|---------------------------------------------------------------------------------------------------------------------------------------------------------------------------------------------------------------------------------------------------------------------------------------------------------------------|-------|
| <b>Title and abstract</b> | 1       | (a) Indicate the study's design with a commonly used term in the title or the abstract                                                                                                                                                                                                                              | 2     |
|                           |         | (b) Provide in the abstract an informative and balanced summary of what was done and what was found                                                                                                                                                                                                                 | 2     |
| <b>Introduction</b>       |         |                                                                                                                                                                                                                                                                                                                     |       |
| Background/rationale      | 2       | Explain the scientific background and rationale for the investigation being reported                                                                                                                                                                                                                                | 6-8   |
| Objectives                | 3       | State specific objectives, including any prespecified hypotheses                                                                                                                                                                                                                                                    | 8     |
| <b>Methods</b>            |         |                                                                                                                                                                                                                                                                                                                     |       |
| Study design              | 4       | Present key elements of study design early in the paper                                                                                                                                                                                                                                                             | 9     |
| Setting                   | 5       | Describe the setting, locations, and relevant dates, including periods of recruitment, exposure, follow-up, and data collection                                                                                                                                                                                     | 9-11  |
| Participants              | 6       | (a) <i>Cohort study</i> —Give the eligibility criteria, and the sources and methods of selection of participants. Describe methods of follow-up                                                                                                                                                                     | 10-11 |
|                           |         | <i>Case-control study</i> —Give the eligibility criteria, and the sources and methods of case ascertainment and control selection. Give the rationale for the choice of cases and controls<br><i>Cross-sectional study</i> —Give the eligibility criteria, and the sources and methods of selection of participants |       |
| Variables                 | 7       | (b) <i>Cohort study</i> —For matched studies, give matching criteria and number of exposed and unexposed                                                                                                                                                                                                            | N/A   |
|                           |         | <i>Case-control study</i> —For matched studies, give matching criteria and the number of controls per case                                                                                                                                                                                                          |       |
| Data sources/measurement  | 8*      | Clearly define all outcomes, exposures, predictors, potential confounders, and effect modifiers. Give diagnostic criteria, if applicable                                                                                                                                                                            | 11-12 |
|                           |         | For each variable of interest, give sources of data and details of methods of assessment (measurement). Describe comparability of assessment methods if there is more than one group                                                                                                                                | 9-12  |
| Bias                      | 9       | Describe any efforts to address potential sources of bias                                                                                                                                                                                                                                                           | 9     |
| Study size                | 10      | Explain how the study size was arrived at                                                                                                                                                                                                                                                                           | 10-11 |
| Quantitative variables    | 11      | Explain how quantitative variables were handled in the analyses. If applicable, describe which groupings were chosen and why                                                                                                                                                                                        | 11-12 |
| Statistical methods       | 12      | (a) Describe all statistical methods, including those used to control for confounding                                                                                                                                                                                                                               | 12    |
|                           |         | (b) Describe any methods used to examine subgroups and interactions                                                                                                                                                                                                                                                 | N/A   |
|                           |         | (c) Explain how missing data were addressed                                                                                                                                                                                                                                                                         | 10-11 |
|                           |         | (d) <i>Cohort study</i> —If applicable, explain how loss to follow-up was addressed<br><i>Case-control study</i> —If applicable, explain how matching of cases and controls was addressed<br><i>Cross-sectional study</i> —If applicable, describe analytical methods taking                                        | 10-11 |

1  
2  
3 account of sampling strategy

---

4 (e) Describe any sensitivity analyses

N/A

5 Continued on next page

6  
7  
8  
9  
10  
11  
12  
13  
14  
15  
16  
17  
18  
19  
20  
21  
22  
23  
24  
25  
26  
27  
28  
29  
30  
31  
32  
33  
34  
35  
36  
37  
38  
39  
40  
41  
42  
43  
44  
45  
46  
47  
48  
49  
50  
51  
52  
53  
54  
55  
56  
57  
58  
59  
60

For peer review only



| <b>Results</b>           |     |                                                                                                                                                                                                              |            |
|--------------------------|-----|--------------------------------------------------------------------------------------------------------------------------------------------------------------------------------------------------------------|------------|
| Participants             | 13* | (a) Report numbers of individuals at each stage of study—eg numbers potentially eligible, examined for eligibility, confirmed eligible, included in the study, completing follow-up, and analysed            | 8-9        |
|                          |     | (b) Give reasons for non-participation at each stage                                                                                                                                                         | N/A        |
|                          |     | (c) Consider use of a flow diagram                                                                                                                                                                           | Appendix 1 |
| Descriptive data         | 14* | (a) Give characteristics of study participants (eg demographic, clinical, social) and information on exposures and potential confounders                                                                     | 11         |
|                          |     | (b) Indicate number of participants with missing data for each variable of interest                                                                                                                          | 8          |
|                          |     | (c) <i>Cohort study</i> —Summarise follow-up time (eg, average and total amount)                                                                                                                             | N/A        |
| Outcome data             | 15* | <i>Cohort study</i> —Report numbers of outcome events or summary measures over time                                                                                                                          | N/A        |
|                          |     | <i>Case-control study</i> —Report numbers in each exposure category, or summary measures of exposure                                                                                                         | N/A        |
|                          |     | <i>Cross-sectional study</i> —Report numbers of outcome events or summary measures                                                                                                                           | 8-9, 11    |
| Main results             | 16  | (a) Give unadjusted estimates and, if applicable, confounder-adjusted estimates and their precision (eg, 95% confidence interval). Make clear which confounders were adjusted for and why they were included | 19-24      |
|                          |     | (b) Report category boundaries when continuous variables were categorized                                                                                                                                    | N/A        |
|                          |     | (c) If relevant, consider translating estimates of relative risk into absolute risk for a meaningful time period                                                                                             | N/A        |
| Other analyses           | 17  | Report other analyses done—eg analyses of subgroups and interactions, and sensitivity analyses                                                                                                               | N/A        |
| <b>Discussion</b>        |     |                                                                                                                                                                                                              |            |
| Key results              | 18  | Summarise key results with reference to study objectives                                                                                                                                                     | 24-25      |
| Limitations              | 19  | Discuss limitations of the study, taking into account sources of potential bias or imprecision. Discuss both direction and magnitude of any potential bias                                                   | 27         |
| Interpretation           | 20  | Give a cautious overall interpretation of results considering objectives, limitations, multiplicity of analyses, results from similar studies, and other relevant evidence                                   | 25-27      |
| Generalisability         | 21  | Discuss the generalisability (external validity) of the study results                                                                                                                                        | N/A        |
| <b>Other information</b> |     |                                                                                                                                                                                                              |            |
| Funding                  | 22  | Give the source of funding and the role of the funders for the present study and, if applicable, for the original study on which the present article is based                                                | 28         |

\*Give information separately for cases and controls in case-control studies and, if applicable, for exposed and unexposed groups in cohort and cross-sectional studies.

**Note:** An Explanation and Elaboration article discusses each checklist item and gives methodological background and published examples of transparent reporting. The STROBE checklist is best used in conjunction with this article (freely available on the Web sites of PLoS Medicine at <http://www.plosmedicine.org/>, Annals of Internal Medicine at <http://www.annals.org/>, and Epidemiology at <http://www.epidem.com/>). Information on the STROBE Initiative is available at [www.strobe-statement.org](http://www.strobe-statement.org).

# BMJ Open

## A population-based case-control study of hospitalisation due to head injuries among bicyclists and motorcyclists in Taiwan

|                                 |                                                                                                                                                                                                                                                                                                                                                                                                                                             |
|---------------------------------|---------------------------------------------------------------------------------------------------------------------------------------------------------------------------------------------------------------------------------------------------------------------------------------------------------------------------------------------------------------------------------------------------------------------------------------------|
| Journal:                        | <i>BMJ Open</i>                                                                                                                                                                                                                                                                                                                                                                                                                             |
| Manuscript ID                   | bmjopen-2017-018574.R2                                                                                                                                                                                                                                                                                                                                                                                                                      |
| Article Type:                   | Research                                                                                                                                                                                                                                                                                                                                                                                                                                    |
| Date Submitted by the Author:   | 28-Sep-2017                                                                                                                                                                                                                                                                                                                                                                                                                                 |
| Complete List of Authors:       | Pai, Chih-Wei; Taipei Medical University, College of Public Health , Graduate Institute of Injury Prevention and Control<br>Chen, Yi-Chu; Graduate Institute of Public Health, College of Public Health, Taipei Medical University<br>Lin, Hsiao-Yu; Taipei Medical University Hospital, Department of Urology<br>Chen, Ping-Ling; Taipei Medical University, College of Public Health, Graduate Institute of Injury Prevention and Control |
| <b>Primary Subject Heading</b>: | Public health                                                                                                                                                                                                                                                                                                                                                                                                                               |
| Secondary Subject Heading:      | Emergency medicine, Epidemiology                                                                                                                                                                                                                                                                                                                                                                                                            |
| Keywords:                       | ACCIDENT & EMERGENCY MEDICINE, PUBLIC HEALTH, TRAUMA MANAGEMENT                                                                                                                                                                                                                                                                                                                                                                             |
|                                 |                                                                                                                                                                                                                                                                                                                                                                                                                                             |

SCHOLARONE™  
Manuscripts

1  
2  
3  
4 1 **A population-based case-control study of hospitalisation due to head injuries**  
5  
6  
7 2 **among bicyclists and motorcyclists in Taiwan**  
8  
9  
10 3

11  
12 4 Chih-Wei Pai<sup>a</sup>; Yi-Chu Chen<sup>b</sup>; Hsiao-Yu Lin<sup>c,\*</sup>; Ping-Ling Chen<sup>a,\*</sup>  
13  
14

15 <sup>a</sup> Graduate Institute of Injury Prevention and Control, College of Public Health, Taipei  
16  
17  
18 6 Medical University. Taiwan ROC  
19  
20

21 <sup>b</sup> Graduate Institute of Public Health, College of Public Health, Taipei Medical  
22  
23  
24 8 University. Taiwan ROC  
25  
26

27 <sup>c</sup> Department of Urology, Taipei Medical University Hospital. Taiwan ROC  
28  
29

30 \* Corresponding authors, these authors contributed equally to this work  
31  
32

33 Email: [ablin@tmu.edu.tw](mailto:ablin@tmu.edu.tw) (HYL); [plchen@tmu.edu.tw](mailto:plchen@tmu.edu.tw) (PLC)  
34  
35

36 +886 02-27361661 ext.6582  
37  
38

39 Address: Graduate Institute of Injury Prevention and Control, College of Public  
40  
41  
42 14 Health, Taipei Medical University, 250 Wuxing St, Taipei City, Taiwan 110.  
43  
44  
45  
46

47 16 **Word count: 3254**  
48  
49  
50  
51  
52  
53  
54  
55  
56  
57  
58  
59  
60

1  
2  
3  
4 18 **Abstract**  
5

6  
7 19 **Introduction**  
8

9  
10 20 According to official statistics in Taiwan, the main body region of injury causing  
11  
12 21 bicyclist deaths was the head, and bicyclists were 2.6 times more likely to be fatally  
13  
14  
15 22 injured than motorcyclists were. There is currently a national helmet law for  
16  
17  
18 23 motorcyclists but not for bicyclists.  
19

20  
21 24 **Objectives**  
22

23  
24 25 The primary aim of this study was to determine whether bicyclist casualties,  
25  
26 26 compared with motorcyclists, have higher odds of head-related hospitalisation. This  
27  
28  
29 27 study also aims to investigate the determinants of head-injury related hospitalisation  
30  
31  
32 28 among bicyclists and motorcyclists, respectively.  
33  
34

35  
36 29 **Methods**  
37

38  
39 30 Using linked data of the National Traffic Accident Dataset and the National Health  
40  
41 31 Insurance Research Database for the period between 2003 and 2012, this study  
42  
43 32 investigates the crash characteristics of bicyclist and motorcyclist casualties presented  
44  
45  
46 33 to hospitals due to motor vehicle crashes. Head injury-related hospitalisation was used  
47  
48  
49 34 as the study outcome for both road users to evaluate whether various factors (e.g.  
50  
51  
52 35 human attributes, road and weather conditions, and vehicle characteristics) are related  
53  
54  
55 36 to hospital admission of those who sustained serious injuries.  
56  
57  
58  
59  
60

1  
2  
3  
4 37 **Results**  
5

6 38 A total of 1239474 bicyclist and motorcyclist casualties, the proportion of bicyclists  
7  
8  
9 39 hospitalised for head injuries was higher than that of motorcyclists (10.0% vs. 6.5%).  
10  
11  
12 40 However, the multiple logistic regression model shows that after the adjustment of  
13  
14  
15 41 this result for other factors such as helmet use, bicyclists were 18% significantly less  
16  
17  
18 42 likely to be hospitalised for head injuries than motorcyclists were (AOR=0.82;  
19  
20  
21 43 CI=0.79-0.85). Other important determinants of head-injury related hospitalisation for  
22  
23  
24 44 bicyclists and motorcyclists include female riders, elderly riders, crashes that occurred  
25  
26  
27 45 in rural areas, moped riders, riding unhelmeted, intoxicated bicyclists and  
28  
29  
30 46 motorcyclists, unlicensed motorcyclists, dusk and dawn conditions, and single-vehicle  
31  
32  
33 47 crashes.  
34

35  
36 48 **Conclusions**  
37

38 49 Our finding underscores the importance of helmet use in reducing hospitalisation due  
39  
40  
41 50 to head injuries among bicyclists while current helmet use is relatively low.  
42  
43

44  
45 51

46  
47 52 **Keywords:** Bicyclist and motorcyclist; Head injury; Hospitalisation; Crashes  
48  
49

50  
51 53  
52  
53  
54  
55  
56  
57  
58  
59  
60

1  
2  
3  
4 54 **Strengths and limitations of this study**  
5

6  
7 55 ■ This is a comprehensive study using the linked data from these two datasets  
8  
9  
10 56 which cover 99.9% of populations.  
11

12  
13 57 ■ Our results derived from the linked datasets can be more reliable than those  
14  
15 58 using a single database alone.  
16  
17

18  
19 59 ■ Hospitalisation data can be more clinically reliable than injury-severity data  
20  
21 60 that are commonly adopted in past studies.  
22  
23

24 61 ● The study is limited by the data that are unavailable from the two datasets such  
25  
26 62 as electronic device use (e.g., phone and MP3 players).  
27  
28  
29

30 63  
31  
32  
33  
34  
35  
36  
37  
38  
39  
40  
41  
42  
43  
44  
45  
46  
47  
48  
49  
50  
51  
52  
53  
54  
55  
56  
57  
58  
59  
60

1  
2  
3  
4 64 **Introduction**  
5  
6  
7 65  
8  
9  
10 66 Two-wheeled motor vehicle crashes involving bicyclists and motorcyclists have  
11  
12 67 been a serious safety problem in Taiwan with regard to injury severity and frequency.  
13  
14 68 Studies have suggested that head injuries are the primary cause of deaths and  
15  
16 69 hospitalisation among bicyclists and motorcyclists<sup>1-3</sup>. A study reported that in Taiwan  
17  
18 70 bicyclists were 2.6 times more likely to be fatally injured than motorcyclists were<sup>4</sup>.  
19  
20  
21 71 The head (approximately 61%) was the main body part that sustained injury resulting  
22  
23 72 in death of these bicyclists<sup>5</sup>. Head injuries among motorcyclists have become less  
24  
25 73 problematic since the enforcement of the helmet use law for motorcyclists in 1997<sup>6</sup>.  
26  
27 74 Chiu et al. (2011) investigated motorcycle head injuries one year after the  
28  
29 75 enforcement of the helmet use law in Taiwan and reported a 33% reduction in head  
30  
31 76 injuries<sup>6</sup>. Helmet use became mandatory for users of electric bicycles in 2016, but not  
32  
33 77 for conventional bicycles.  
34  
35  
36  
37  
38  
39  
40  
41  
42  
43  
44 78 According to official accident statistics (the National Traffic Accident dataset), the  
45  
46 79 number of motorcycle accidents has been steadily decreasing; however, the number of  
47  
48 80 bicycle accidents has been stably increasing. This is primarily attributable to the  
49  
50 81 increasing popularity of bicycle use. For instance, several bike sharing programmes  
51  
52 82 have been implemented in several metropolitan cities such as Taipei City and  
53  
54  
55  
56  
57  
58  
59  
60

1  
2  
3  
4 83 Taichuang City. In addition, the use of electric bicycles and racing bikes, which are  
5  
6  
7 84 widely used for recreational purposes and travelling between cities, has been  
8  
9  
10 85 increasing.

11  
12 86 Studies conducted mainly in Asian countries on helmet use and motorcyclist  
13  
14  
15 87 injuries have reported that helmet use and related laws have successfully reduced head  
16  
17  
18 88 injuries, thus reducing fatalities among motorcyclists. Ichiwaka et al. (2003) reported  
19  
20  
21 89 a 41% reduction in head injuries in Thailand 2 years after the implementation of a  
22  
23  
24 90 mandatory helmet use law<sup>7</sup>. A similar reduction in head injuries and fatalities has been  
25  
26  
27 91 reported in Malaysia<sup>8</sup>, Vietnam<sup>9</sup>, the United States<sup>3</sup>, and Italy<sup>10</sup> after the  
28  
29  
30 92 implementation of helmet use laws. Bicycle helmet use is a means of reducing  
31  
32  
33 93 morbidity and mortality among bike users. Several case-controlled studies have  
34  
35  
36 94 reported an association of helmet use with a decreased rate of head injury and mortality  
37  
38  
39 95 among riders of all ages, with bicycle helmets reducing the risk of head and brain  
40  
41  
42 96 injury by 65%-88%<sup>11</sup>. Moreover, Attewell et al. (2001)<sup>12</sup> conducted a meta-analysis of  
43  
44  
45 97 16 observational studies and reported that bicycle helmets can significantly reduce the  
46  
47  
48 98 risks of head injury by approximately 60%.

49  
50 99 Current efforts to increase helmet use in order to prevent head injuries in accidents  
51  
52  
53 100 include campaigns to increase awareness regarding the importance of helmet use,  
54  
55  
56 101 along with advocating helmet use laws. Over the last decades, mandatory bicycle  
57  
58  
59  
60



1  
2  
3  
4 102 helmet use laws have been implemented in several countries including Australia, New  
5  
6  
7 103 Zealand, Sweden, and Canada. A study indicated that helmet use laws act as a  
8  
9  
10 104 deterrent to cycling<sup>13</sup>. Other studies have similarly reported a decline in cycling due to  
11  
12 105 helmet-use law.<sup>14 15</sup>. In general, a positive effect of mandatory cycle helmet use laws  
13  
14  
15 106 on bicyclist head injuries has been observed in Australia<sup>16 17</sup>, Sweden<sup>18 19</sup>, and New  
16  
17  
18 107 Zealand<sup>20 21</sup>.

19  
20  
21 108 When reviewed together, literature has suggested that helmet use and related laws  
22  
23  
24 109 are beneficial for reducing head injuries and fatalities among bicyclists and  
25  
26  
27 110 motorcyclists.

28  
29  
30 111 In Taiwan, helmet use is mandatory for motorcyclists but not bicyclists. This leads  
31  
32  
33 112 to an important research question of whether bicyclists involved in motor vehicle  
34  
35  
36 113 crashes (MVCs: a crash occurs when a vehicle collides with other road users, or other  
37  
38  
39 114 stationary objects such as a tree, telegraphy, or traffic island), compared with  
40  
41  
42 115 motorcyclists, are more likely to be hospitalised due to head injuries. The primary aim  
43  
44  
45 116 of this study was to determine whether bicyclist casualties, compared with  
46  
47  
48 117 motorcyclists, have higher odds of head-related hospitalisation. Another important  
49  
50  
51 118 research hypothesis of the current research is that risk factors that influence  
52  
53  
54 119 head-injury related hospitalisation among bicyclists and motorcyclists may include  
55  
56  
57 120 helmet use, alcohol consumption, or license status etc. This study also aims to  
58  
59  
60

1  
2  
3  
4 121 investigate the determinants of head-injury related hospitalisation among bicyclists  
5  
6  
7 122 and motorcyclists, respectively.  
8  
9

10 123

## 11 12 124 **Materials and Methods**

13  
14  
15  
16 125

### 17 18 126 *Data source*

19  
20  
21 127 Two datasets, police-reported crash data provided by the National Police Agency,  
22  
23  
24 128 Ministry of the Interior, and the National Health Insurance Research Database  
25  
26  
27 129 (NHIRD) provided by the Health and Welfare Data Science Center, Ministry of  
28  
29  
30 130 Health and Welfare, were used in the present study. The National Traffic Accident  
31  
32  
33 131 Dataset is recorded by trained police accident investigators after an accident has been  
34  
35  
36 132 reported to police. The National Traffic Accident Dataset report forms comprise the  
37  
38  
39 133 following three files: accident, vehicle, and victim files. A thorough description of  
40  
41  
42 134 National Traffic Accident Dataset can be found in the study of Chen et al. (2016)<sup>22</sup>.

43  
44 135 The Bureau of National Health Insurance (BNHI) in Taiwan implemented the  
45  
46  
47 136 National Health Insurance (NHI) programme on 1 March, 1995, and the NHI covers  
48  
49  
50 137 99% of the resident of Taiwan. The NHIRD comprises the outpatient and inpatient  
51  
52  
53 138 claims data of all NHI beneficiaries, all hospitals and clinics are required to report to  
54  
55  
56 139 the BNHI on a monthly basis. The information obtained from the NHIRD can be  
57  
58  
59  
60

1  
2  
3  
4 140 considered complete and accurate<sup>23</sup> because the BNHI ensures the accuracy of claims  
5  
6  
7 141 files by performing periodical expert reviews on a random sample for every 50-100  
8  
9  
10 142 ambulatory and inpatient claims. The NHIRD contains data such as patients' age and  
11  
12  
13 143 gender, admission and discharge dates, care location, hospital level, treatment  
14  
15  
16 144 department, surgical procedures, medical expenditures, diagnosis of disease or injury  
17  
18  
19 145 (in accordance with International Classification of Diseases, Ninth Revision Clinical  
20  
21  
22 146 Modification [ICD-9-CM] N-codes), and cause of injury (in accordance with  
23  
24  
25 147 ICD-9-CM E-codes).

26  
27 148 ICD-9-CM N-codes 800 to 999 that report injury diagnoses were used for  
28  
29  
30 149 extracting injury data. Specifically, the following N-codes were used for extracting  
31  
32  
33 150 head-related injuries: 800, 801, 803, 804, 850-854, 950.1-950.3, 995.55, 959.01,  
34  
35  
36 151 873.0, 873.1, 870, 871, 918, 802, 872, 873.2-873.9. The encrypted personal  
37  
38  
39 152 identification data in the NHIRD were used to link externally the NHIRD dataset to  
40  
41  
42 153 the National Traffic Accident dataset. Patients' identification information that is used  
43  
44  
45 154 for linking the two datasets is encrypted by the Health and Welfare Data Science  
46  
47  
48 155 Center, Taiwan. No individual patient or casualty can be identified and therefore, our  
49  
50  
51 156 study was exempted from review by an institutional review board (IRB #:201409033).

52  
53 157 The flow chart of sample selection from the National Traffic Accident Dataset  
54  
55  
56 158 and the NHIRD is presented in supplementary appendix 1. The current research  
57  
58  
59  
60

1  
2  
3  
4 159 examined data for the period between 2003 and 2012. By linking the National Traffic  
5  
6  
7 160 Accident Dataset and the NHIRD, a total of 4054668 casualties involved in MVCs  
8  
9  
10 161 were identified. Among the 4054668 casualties, 1998606 were bicyclists and  
11  
12 162 motorcyclists involved in MVCs (after excluding missing data such as identification  
13  
14  
15 163 and sex data and remaining cases where victims were treated at different times). After  
16  
17  
18 164 removal of the cases where the individuals involved did not receive an injury  
19  
20  
21 165 diagnosis and where patients died within 24 hours, a total of 1239474 casualties were  
22  
23  
24 166 either hospitalised or admitted to emergency departments. Among these 1239474  
25  
26  
27 167 casualties, 82711 were hospitalised for head injuries (treated as cases), and 1156763  
28  
29  
30 168 were hospitalised for other injury types or received emergency treatment only (treated  
31  
32  
33 169 as controls).

34  
35  
36 170

37  
38 171 *Variable definitions*

39  
40  
41 172 The current study investigates the effects of demographic variables, temporal  
42  
43  
44 173 factors, road and environment characteristics, and crash factors on head injuries  
45  
46  
47 174 among bicyclist and motorcyclist casualties. Demographic data were collected for the  
48  
49  
50 175 casualties, namely gender (male and female); age (four groups: <18, 18-40, 41-64,  
51  
52  
53 176 and 65 or above); blood alcohol consumption (BAC) level ( $\leq 0.03\%$  or  $> 0.03\%$ );  
54  
55  
56 177 license status (yes: with a valid license, or no: without a valid license); helmet use  
57  
58  
59  
60

1  
2  
3  
4 178 (yes or no); and location (highly urbanised area, moderately urbanised area,  
5  
6  
7 179 boomtown, rural area). Vehicle attributes were the engine size ( $\leq 50$ cc and  $\geq 51$ cc or  
8  
9  
10 180 above) Road and environment factors were the following variables: path type (straight  
11  
12 181 road, curved road, or crossroads/ roundabout), lighting (daylight, dusk/ dawn); road  
13  
14  
15 182 type (provincial highway, county road, or others); road surface (dry, or wet/slippery);  
16  
17  
18 183 road defect (yes or no); barrier (yes or no); traffic signal (yes or no); separation of  
19  
20  
21 184 traffic direction (yes or no); and traffic island (yes or no). Crash characteristics were  
22  
23  
24 185 the crash type (multiple-vehicle crash or single-vehicle crash) and object type which  
25  
26  
27 186 was divided into fixed objects and unfix objects.

28  
29  
30 187

31  
32  
33 188 *Statistical analysis*

34  
35  
36 189 Trend of head-related injuries among two-wheeler riders due to MVCs is  
37  
38  
39 190 compared and the difference in hospitalisation percentages is tested with the  
40  
41  
42 191 Mann-Kendall trend test. Distribution of head-injury related hospitalisation and non  
43  
44  
45 192 head-injury related hospitalisation by a set of variables (e.g., human attributes,  
46  
47  
48 193 environmental factors, and vehicle characteristics) is reported. Chi-square tests are  
49  
50  
51 194 conducted for comparing hospitalised patients (for head-related injuries) with  
52  
53  
54 195 hospitalised ones (for other injuries). Because the dependent variable is binary  
55  
56  
57 196 (hospitalisation for head injuries vs. emergency treatment or hospitalisation for other  
58  
59  
60

1  
2  
3  
4 197 injury types), a logistic regression model was estimated to examine the determinants  
5  
6  
7 198 of hospitalisation for head injuries. A pooled logistic regression model was estimated:  
8  
9  
10 199 the first model of hospitalisation for head injuries included casualty type (bicyclists vs.  
11  
12  
13 200 motorcyclists) as one of the variables. In estimating the models, the variables that  
14  
15  
16 201 have significance level ( $p < 0.2$ ) in the univariate logistic regression models were then  
17  
18  
19 202 incorporated into the multivariate logistic regression models. VIF (variance inflation  
20  
21  
22 203 factor) was conducted to assess multicollinearity among the variables. Only  
23  
24  
25 204 confounding variables were included in the models. Two separate models were  
26  
27  
28 205 employed to examine the determinants of hospitalisation for head injuries among  
29  
30  
31 206 bicyclists and motorcyclists. These two models determined contributory factors that  
32  
33  
34 207 may be different across bicyclist and motorcyclist casualties.  
35  
36  
37  
38  
39 208

## 209 **Results**

40  
41  
42 210  
43  
44 211 We further illustrate the trend of head injuries sustained by bicyclists and  
45  
46  
47 212 motorcyclists who presented to the emergency rooms or were admitted to hospitals  
48  
49  
50 213 (see supplementary appendix 2). The trend of head injuries appeared to steadily  
51  
52  
53 214 decrease among these two groups: the percentage of head injuries decreased from  
54  
55  
56 215 16.4% and 10.2% in 2003 to 7.8% and 4.7% in 2012 among bicyclists and  
57  
58  
59  
60

1  
2  
3  
4 216 motorcyclists, respectively. The decreasing trend was statistically significant  
5  
6  
7 217 according to the Mann-Kendall trend test ( $p < 0.01$ ). Moreover, the risk of sustaining  
8  
9  
10 218 head injuries tended to be higher among bicyclists than among motorcyclists.

11  
12 Table 1 lists the N-codes for principal diagnoses of injuries to various body  
13  
14  
15 220 regions resulting in the hospitalisation of bicyclists and motorcyclists. Traumatic brain  
16  
17  
18 221 injury (TBI, 29.3%), lower leg and ankle fracture (12.3%), and shoulder and upper  
19  
20  
21 222 arm fracture (9.4%) were the top three injury types among motorcyclists. Furthermore,  
22  
23  
24 223 TBI (41.4%), lower leg and ankle fracture (10.7%), and forearm and elbow fracture  
25  
26  
27 224 (6.9%) were the top three injury types among bicyclists. The proportion of bicyclists  
28  
29  
30 225 diagnosed to sustain a TBI was higher than that of motorcyclists (41.4% vs. 29.3%).  
31  
32  
33  
34  
35  
36  
37  
38  
39  
40  
41  
42  
43  
44  
45  
46  
47  
48  
49  
50  
51  
52  
53  
54  
55  
56  
57  
58  
59  
60

Table 1: N-codes of principal diagnoses for injuries requiring hospitalization in two-wheeled vehicle crashes

| <u>Total</u>                             |       |      | <u>Motorcyclists</u>                     |       |      | <u>Bicyclists</u>                        |      |      |
|------------------------------------------|-------|------|------------------------------------------|-------|------|------------------------------------------|------|------|
| N-code                                   | N     | %    | N-code                                   | N     | %    | N-code                                   | N    | %    |
| Traumatic brain injury                   | 67464 | 30.0 | Traumatic brain injury                   | 61826 | 29.3 | Traumatic brain injury                   | 5638 | 41.4 |
| Lower leg and ankle fracture             | 27358 | 12.2 | Lower leg and ankle fracture             | 25908 | 12.3 | Lower leg and ankle fracture             | 1450 | 10.7 |
| Shoulder and upper arm fracture          | 20712 | 9.2  | Shoulder and upper arm fracture          | 19839 | 9.4  | Forearm and elbow fracture               | 939  | 6.9  |
| Forearm and elbow fracture               | 16782 | 7.5  | Forearm and elbow fracture               | 15843 | 7.5  | Shoulder and upper arm fracture          | 873  | 6.4  |
| Other head, face, and neck               | 15247 | 6.8  | Other head, face, and neck               | 14526 | 6.9  | Hip fracture                             | 743  | 5.5  |
| Upper leg and thigh fracture             | 10975 | 4.9  | Upper leg and thigh fracture             | 10528 | 5.0  | Other head, face, and neck               | 721  | 5.3  |
| Sternum/ribs/pelvis fracture             | 10888 | 4.8  | Sternum/ribs/pelvis fracture             | 10509 | 5.0  | Spinal fractures                         | 620  | 4.6  |
| Minor injuries: contusions and abrasions | 8640  | 3.8  | Minor injuries: contusions and abrasions | 8160  | 3.9  | Minor injuries: contusions and abrasions | 480  | 3.5  |
| Minor injuries: open wounds              | 7807  | 3.5  | Minor injuries: open wounds              | 7501  | 3.6  | Sternum/ribs/pelvis fracture             | 466  | 3.4  |
| Wrist/hand/finger fracture               | 6411  | 2.9  | Wrist/hand/finger fracture               | 6213  | 2.9  | Upper leg and thigh fracture             | 360  | 2.6  |
| Other injuries                           | 32592 | 14.5 | Other injuries                           | 30416 | 14.4 | Other injuries                           | 1317 | 9.7  |



222

223 Tables 2-4 summarise the human attributes, environmental factors, and vehicle  
224 characteristics of two-wheeler casualties with head-related injuries occurring between  
225 2003 and 2012. One of the noteworthy results includes that the proportion of  
226 bicyclists hospitalised for head injuries was higher than that of motorcyclists (10.0%  
227 vs. 6.5%). As reported in Table 2, there are interesting data on helmet use among  
228 injured bicyclists and motorcyclists, confirming what was stated in introduction:  
229 compared to the injured motorcyclists that had much higher helmet-use rate (91.57%),  
230 the injured bicyclists were less likely to wear helmet (8.93%) since there is no law  
231 requiring helmet use for bicyclists. Other noteworthy results from Tables 2-4 are not  
232 interpreted here for brevity.

Table 2: Characteristics of inpatients with head injury involved in two-wheeled vehicle crashes

|                               | Two-wheeled vehicles |      |          |      |          | Motorcyclists |      |          |      |          | Bicyclists |      |          |      |          |
|-------------------------------|----------------------|------|----------|------|----------|---------------|------|----------|------|----------|------------|------|----------|------|----------|
|                               | Cases                |      | Controls |      | <i>p</i> | Cases         |      | Controls |      | <i>p</i> | Cases      |      | Controls |      | <i>p</i> |
|                               | n                    | %    | n        | %    |          | n             | %    | n        | %    |          | n          | %    | n        | %    |          |
| Total                         | 82711                | 6.7  | 1156763  | 93.3 |          | 76352         | 6.5  | 1099277  | 93.5 |          | 6359       | 10.0 | 57486    | 90.0 | <0.001   |
| Gender                        |                      |      |          |      |          |               |      |          |      |          |            |      |          |      |          |
| Male                          | 48373                | 7.1  | 634478   | 92.9 | <0.001   | 44706         | 6.9  | 601593   | 93.1 | <0.001   | 3667       | 10.0 | 32885    | 90.0 | 0.523    |
| Female                        | 34338                | 6.2  | 522285   | 93.8 |          | 31646         | 6.0  | 497684   | 94.0 |          | 2692       | 9.9  | 24601    | 90.1 |          |
| Age group (years)             |                      |      |          |      |          |               |      |          |      |          |            |      |          |      |          |
| <18                           | 5123                 | 9.4  | 49354    | 90.6 | <0.001   | 3718          | 10.5 | 31846    | 89.5 | <0.001   | 1405       | 7.4  | 17508    | 92.6 | <0.001   |
| 18-40                         | 38471                | 5.2  | 697198   | 94.8 |          | 37955         | 5.2  | 689948   | 94.8 |          | 516        | 6.6  | 7250     | 93.4 |          |
| 41-64                         | 26380                | 7.9  | 307322   | 92.1 |          | 24659         | 7.8  | 291586   | 92.2 |          | 1721       | 9.9  | 15736    | 90.1 |          |
| 65+                           | 12737                | 11.0 | 102860   | 89.0 |          | 10020         | 10.4 | 85874    | 89.6 |          | 2717       | 13.8 | 16986    | 86.2 |          |
| Location                      |                      |      |          |      |          |               |      |          |      |          |            |      |          |      |          |
| Highly urbanized area         | 8815                 | 3.6  | 237868   | 96.4 | <0.001   | 8218          | 3.5  | 227548   | 96.5 | <0.001   | 597        | 5.5  | 10320    | 94.5 | <0.001   |
| Medium urbanized area         | 23379                | 5.5  | 401279   | 94.5 |          | 21743         | 5.4  | 383541   | 94.6 |          | 1636       | 8.4  | 17738    | 91.6 |          |
| Boomtown                      | 20149                | 7.0  | 268552   | 93.0 |          | 18709         | 6.8  | 255449   | 93.2 |          | 1440       | 9.9  | 13103    | 90.1 |          |
| General township              | 18924                | 9.8  | 174893   | 90.2 |          | 17251         | 9.5  | 163844   | 90.5 |          | 1673       | 13.2 | 11049    | 86.8 |          |
| Rural area                    | 11444                | 13.4 | 73818    | 86.6 |          | 10431         | 13.2 | 68556    | 86.8 |          | 1013       | 16.1 | 5262     | 83.9 |          |
| Motorcycle engine capacity    |                      |      |          |      |          |               |      |          |      |          |            |      |          |      |          |
| ≥51cc                         | 60411                | 6.2  | 907379   | 93.8 | <0.001   | 60411         | 6.2  | 907379   | 93.8 | <0.001   | NA         | NA   | NA       | NA   | NA       |
| ≤50cc                         | 15941                | 7.7  | 191898   | 92.3 |          | 15941         | 7.7  | 191898   | 92.3 |          | NA         | NA   | NA       | NA   |          |
| Drunk Driving                 |                      |      |          |      |          |               |      |          |      |          |            |      |          |      |          |
| No (BAC <sup>a</sup> ≤0.03%)  | 71070                | 6.0  | 1108293  | 94.0 | <0.001   | 64876         | 5.8  | 1051700  | 94.2 | <0.001   | 6194       | 9.9  | 56593    | 90.1 | <0.001   |
| Yes (BAC <sup>a</sup> >0.03%) | 11641                | 19.4 | 48470    | 80.6 |          | 11476         | 19.4 | 47577    | 80.6 |          | 165        | 15.6 | 893      | 84.4 |          |

1  
2  
3  
4  
5  
6  
7  
8  
9  
10  
11  
12  
13  
14  
15  
16  
17  
18  
19  
20  
21  
22  
23  
24  
25  
26  
27  
28  
29  
30  
31  
32  
33  
34  
35  
36  
37  
38  
39  
40  
41  
42  
43  
44  
45  
46  
47  
48  
49

|            |       |      |         |      |        |       |      |         |      |        |      |      |       |      |        |
|------------|-------|------|---------|------|--------|-------|------|---------|------|--------|------|------|-------|------|--------|
| Helmet use |       |      |         |      |        |       |      |         |      |        |      |      |       |      |        |
| Yes        | 63575 | 5.9  | 1011701 | 94.1 | <0.001 | 63158 | 5.9  | 1006568 | 94.1 | <0.001 | 417  | 7.5  | 5133  | 92.5 | <0.001 |
| No         | 19136 | 11.7 | 145062  | 88.3 |        | 13194 | 12.5 | 92709   | 87.5 |        | 5942 | 10.2 | 52353 | 89.8 |        |
| License    |       |      |         |      |        |       |      |         |      |        |      |      |       |      |        |
| Yes        | 57613 | 5.7  | 952109  | 94.3 | <0.001 | 57613 | 5.7  | 952109  | 94.3 | <0.001 | NA   | NA   | NA    | NA   | NA     |
| No         | 16028 | 11.0 | 129169  | 89.0 |        | 16028 | 11.0 | 129169  | 89.0 |        | NA   | NA   | NA    | NA   |        |

<sup>a</sup>BAC: Blood alcohol concentration

For peer review only

Table 3. Environment characteristics of inpatients with head injury involved in two-wheeled vehicle crashes

|                                        | Two-wheeled vehicles |      |          |      |          | Motorcyclists |      |          |      |          | Bicyclists |      |          |      |          |
|----------------------------------------|----------------------|------|----------|------|----------|---------------|------|----------|------|----------|------------|------|----------|------|----------|
|                                        | Cases                |      | Controls |      | <i>p</i> | Cases         |      | Controls |      | <i>p</i> | Cases      |      | Controls |      | <i>p</i> |
|                                        | n                    | %    | n        | %    |          | n             | %    | n        | %    |          | n          | %    | n        | %    |          |
| Path Type                              |                      |      |          |      |          |               |      |          |      |          |            |      |          |      |          |
| Straight road                          | 34581                | 7.9  | 404337   | 92.1 | <0.001   | 31629         | 7.7  | 379675   | 92.3 | <0.001   | 2952       | 10.7 | 24662    | 89.3 | <0.001   |
| Curved road                            | 4344                 | 9.1  | 43312    | 90.9 |          | 4031          | 9.0  | 40950    | 91.0 |          | 313        | 11.7 | 2362     | 88.3 |          |
| Crossroads/Roundabout                  | 43786                | 5.8  | 709114   | 94.2 |          | 40692         | 5.7  | 678652   | 94.3 |          | 3094       | 9.2  | 30462    | 90.8 |          |
| Lighting                               |                      |      |          |      |          |               |      |          |      |          |            |      |          |      |          |
| Daylight                               | 79618                | 6.6  | 1131762  | 93.4 | <0.001   | 73593         | 6.4  | 1076250  | 93.6 | <0.001   | 6025       | 9.8  | 55512    | 90.2 | <0.001   |
| Dusk or dawn                           | 3093                 | 11.0 | 25001    | 89.0 |          | 2759          | 10.7 | 23027    | 89.3 |          | 334        | 14.5 | 1974     | 85.5 |          |
| Road type                              |                      |      |          |      |          |               |      |          |      |          |            |      |          |      |          |
| Provincial Highway                     | 7368                 | 10.5 | 62628    | 89.5 | <0.001   | 6833          | 10.3 | 59461    | 89.7 | <0.001   | 535        | 14.5 | 3167     | 85.5 | <0.001   |
| County road                            | 8923                 | 9.6  | 84422    | 90.4 |          | 8185          | 9.3  | 80043    | 90.7 |          | 738        | 14.4 | 4379     | 85.6 |          |
| Others(Township road/<br>Private road) | 66404                | 6.2  | 1009614  | 93.8 |          | 61318         | 6.0  | 959677   | 94.0 |          | 5086       | 9.2  | 49937    | 90.8 |          |
| Road surface                           |                      |      |          |      |          |               |      |          |      |          |            |      |          |      |          |
| Dry                                    | 74774                | 6.8  | 1024947  | 93.2 | <0.001   | 69030         | 6.6  | 973197   | 93.4 | <0.001   | 5744       | 10.0 | 51750    | 90.0 | 0.482    |
| Wet/Slippery                           | 7937                 | 5.7  | 131816   | 94.3 |          | 7322          | 5.5  | 126080   | 94.5 |          | 615        | 9.7  | 5736     | 90.3 |          |
| Road defect                            |                      |      |          |      |          |               |      |          |      |          |            |      |          |      |          |
| No                                     | 81560                | 6.7  | 1144635  | 93.3 | <0.001   | 75251         | 6.5  | 1087538  | 93.5 | <0.001   | 6309       | 10.0 | 57097    | 90.0 | 0.367    |
| Yes                                    | 1151                 | 8.7  | 12128    | 91.3 |          | 1101          | 8.6  | 11739    | 91.4 |          | 50         | 11.4 | 389      | 88.6 |          |
| Barrier                                |                      |      |          |      |          |               |      |          |      |          |            |      |          |      |          |
| No                                     | 79862                | 6.7  | 1120926  | 93.3 | <0.001   | 73658         | 6.5  | 1065006  | 93.5 | <0.001   | 6204       | 10.0 | 55920    | 90.0 | 0.224    |
| Yes                                    | 2849                 | 7.4  | 35837    | 92.6 |          | 2694          | 7.3  | 34271    | 92.7 |          | 155        | 9.0  | 1566     | 91.0 |          |

1  
2  
3  
4  
5  
6  
7  
8  
9  
10  
11  
12  
13  
14  
15  
16  
17  
18  
19  
20  
21  
22  
23  
24  
25  
26  
27  
28  
29  
30  
31  
32  
33  
34  
35  
36  
37  
38  
39  
40  
41  
42  
43  
44  
45  
46  
47  
48  
49

|                                  |       |     |        |      |        |       |     |        |      |        |      |      |       |      |        |
|----------------------------------|-------|-----|--------|------|--------|-------|-----|--------|------|--------|------|------|-------|------|--------|
| Traffic signal                   |       |     |        |      |        |       |     |        |      |        |      |      |       |      |        |
| Yes                              | 25993 | 5.7 | 434048 | 94.3 | <0.001 | 24265 | 5.5 | 417304 | 94.5 | <0.001 | 1728 | 9.4  | 16744 | 90.6 | 0.003  |
| No                               | 56718 | 7.3 | 722715 | 92.7 |        | 52087 | 7.1 | 681973 | 92.9 |        | 4631 | 10.2 | 40742 | 89.8 |        |
| Separation of traffic directions |       |     |        |      |        |       |     |        |      |        |      |      |       |      |        |
| Yes                              | 48122 | 6.9 | 648417 | 93.1 | <0.001 | 44113 | 6.7 | 613461 | 93.3 | <0.001 | 4009 | 10.3 | 34956 | 89.7 | 0.002  |
| No                               | 34589 | 6.4 | 508346 | 93.6 |        | 32239 | 6.2 | 485816 | 93.8 |        | 2350 | 9.4  | 22530 | 90.6 |        |
| Traffic island                   |       |     |        |      |        |       |     |        |      |        |      |      |       |      |        |
| Yes                              | 25552 | 7.6 | 309424 | 92.4 | <0.001 | 23531 | 7.4 | 293206 | 92.6 | <0.001 | 2021 | 11.1 | 16218 | 88.9 | <0.001 |
| No                               | 57159 | 6.3 | 847339 | 93.7 |        | 52821 | 6.1 | 806071 | 93.9 |        | 4338 | 9.5  | 41268 | 90.5 |        |

Table 4. Crash characteristics of inpatients with head injury involved in two-wheeled vehicle crashes

|                            | Two-wheeled vehicles |      |          |      |          | Motorcyclists |      |          |      |          | Bicyclists |      |          |      |          |
|----------------------------|----------------------|------|----------|------|----------|---------------|------|----------|------|----------|------------|------|----------|------|----------|
|                            | Cases                |      | Controls |      | <i>p</i> | Cases         |      | Controls |      | <i>p</i> | Cases      |      | Controls |      | <i>p</i> |
|                            | n                    | %    | n        | %    |          | n             | %    | n        | %    |          | n          | %    | n        | %    |          |
| Crash type                 |                      |      |          |      |          |               |      |          |      |          |            |      |          |      |          |
| Multiple vehicle           | 66457                | 6.0  | 1047128  | 94.0 | <0.001   | 60466         | 5.7  | 991673   | 94.3 | <0.001   | 5991       | 9.8  | 5981.2   | 90.2 | <0.001   |
| Single vehicle             | 16245                | 12.9 | 109635   | 87.1 |          | 15877         | 12.9 | 107604   | 87.1 |          | 368        | 15.3 | 352.7    | 84.7 |          |
| Object type                |                      |      |          |      |          |               |      |          |      |          |            |      |          |      |          |
| Unfixed objects            | 10829                | 11.3 | 84984    | 88.7 | <0.001   | 10542         | 11.2 | 83360    | 88.8 | <0.001   | 287        | 15   | 272      | 85.0 | 0.461    |
| Fixed objects              | 5416                 | 18.0 | 24651    | 82.0 |          | 5335          | 18.0 | 24244    | 82.0 |          | 81         | 16.6 | 64.4     | 83.4 |          |
| Fixed objects              |                      |      |          |      |          |               |      |          |      |          |            |      |          |      |          |
| Buildings/Barriers         | 1574                 | 14.4 | 9381     | 85.6 | <0.001   | 1518          | 14.3 | 9072     | 85.7 | <0.001   | 56         | 15.3 | 40.7     | 84.7 | 0.282    |
| Traffic                    | 3842                 | 20.1 | 15270    | 79.9 |          | 3817          | 20.1 | 15172    | 79.9 |          | 25         | 20.3 | 4.7      | 79.7 |          |
| islands/Trees/Poles/Others |                      |      |          |      |          |               |      |          |      |          |            |      |          |      |          |
| Unfixed objects            |                      |      |          |      |          |               |      |          |      |          |            |      |          |      |          |
| Animals/Pedestrians        | 2242                 | 7.1  | 29369    | 92.9 | <0.001   | 2230          | 7.1  | 29134    | 92.9 | <0.001   | 12         | 4.9  | 7.1      | 95.1 | <0.001   |
| Skidding vehicle           | 8587                 | 13.4 | 55615    | 86.6 |          | 8312          | 13.3 | 54226    | 86.7 |          | 275        | 16.5 | 258.5    | 83.5 |          |

232

233 Table 5 lists the crude and adjusted odds ratios (ORs) of hospitalisation for head

234 injuries among bicyclists and motorcyclists using logistic regression models. Three

235 models were estimated: a pooled model that considered the variable “vehicle type” as

236 a risk factor and two separate models for bicyclists and motorcyclists. According to

237 the variance inflation factor being  $<3$ , there was no need to be concerned about

238 multi-collinearity in the models.

Table 5. Crude and adjusted odds ratios of hospitalization for head injury in two-wheeled vehicle crashed accidents

|                            | Two-wheeled vehicles |             |             |             | Motorcyclists |             |             |             | Bicyclist   |             |             |             |
|----------------------------|----------------------|-------------|-------------|-------------|---------------|-------------|-------------|-------------|-------------|-------------|-------------|-------------|
|                            | Crude OR             | 95% CI      | Adjusted OR | 95% CI      | Crude OR      | 95% CI      | Adjusted OR | 95% CI      | Crude OR    | 95% CI      | Adjusted OR | 95% CI      |
| Vehicle type               |                      |             |             |             |               |             |             |             |             |             |             |             |
| Motorcycle                 | 1.00 (ref.)          |             | 1.00 (ref.) |             | ---           |             | ---         |             | ---         |             | ---         |             |
| Bicycle                    | 1.59*                | 1.55 - 1.64 | 0.82*       | 0.79 - 0.85 |               |             |             |             |             |             |             |             |
| Gender                     |                      |             |             |             |               |             |             |             |             |             |             |             |
| Male                       | 1.00 (ref.)          |             | 1.00 (ref.) |             | 1.00 (ref.)   |             | 1.00 (ref.) |             | 1.00 (ref.) |             | 1.00 (ref.) |             |
| Female                     | 0.86*                | 0.85 - 0.88 | 1.08*       | 1.07 - 1.10 | 0.86*         | 0.84 - 0.87 | 1.03*       | 1.02 - 1.05 | 0.98        | 0.93 - 1.03 | 1.01        | 0.95 - 1.06 |
| Age(year)                  |                      |             |             |             |               |             |             |             |             |             |             |             |
| <18                        | 0.57*                | 0.57 - 0.58 | 0.62*       | 0.60 - 0.64 | 0.59*         | 0.58 - 0.60 | 0.71*       | 0.68 - 0.74 | 0.61*       | 0.56 - 0.67 | 0.86*       | 0.77 - 0.96 |
| 18-40                      | 1.00 (ref.)          |             | 1.00 (ref.) |             | 1.00 (ref.)   |             | 1.00 (ref.) |             | 1.00 (ref.) |             | 1.00 (ref.) |             |
| 41-64                      | 1.29*                | 1.28 - 1.31 | 0.86*       | 0.83 - 0.89 | 1.32*         | 1.30 - 1.34 | 0.93*       | 0.89 - 0.97 | 0.98        | 0.93 - 1.04 | 1.40*       | 1.29 - 1.51 |
| 65+                        | 1.87*                | 1.83 - 1.90 | 1.23*       | 1.19 - 1.28 | 1.78*         | 1.74 - 1.82 | 1.23*       | 1.18 - 1.29 | 1.78*       | 1.69 - 1.88 | 1.92*       | 1.80 - 2.06 |
| Location                   |                      |             |             |             |               |             |             |             |             |             |             |             |
| Highly urbanized area      | 1.00 (ref.)          |             | 1.00 (ref.) |             | 1.00 (ref.)   |             | 1.00 (ref.) |             | 1.00 (ref.) |             | 1.00 (ref.) |             |
| Medium urbanized area      | 0.74*                | 0.73 - 0.75 | 1.49*       | 1.45 - 1.53 | 0.74*         | 0.73 - 0.76 | 1.51*       | 1.47 - 1.55 | 0.78*       | 0.73 - 0.82 | 1.60*       | 1.45 - 1.76 |
| Boomtown                   | 1.07*                | 1.05 - 1.08 | 1.78*       | 1.73 - 1.83 | 1.07*         | 1.05 - 1.09 | 1.81*       | 1.76 - 1.86 | 0.99        | 0.93 - 1.06 | 1.89*       | 1.70 - 2.09 |
| General township           | 1.67*                | 1.64 - 1.70 | 2.31*       | 2.25 - 2.38 | 1.67*         | 1.64 - 1.70 | 2.37*       | 2.30 - 2.44 | 1.50*       | 1.41 - 1.59 | 2.42*       | 2.18 - 2.68 |
| Rural area                 | 2.36*                | 2.31 - 2.41 | 2.74*       | 2.66 - 2.83 | 2.38*         | 2.33 - 2.43 | 2.77*       | 2.68 - 2.87 | 1.88*       | 1.75 - 2.02 | 2.94*       | 2.63 - 3.29 |
| Motorcycle engine capacity |                      |             |             |             |               |             |             |             |             |             |             |             |
| ≥51cc                      | ---                  |             | ---         |             | 1.00 (ref.)   |             | 1.00 (ref.) |             | ---         |             | ---         |             |
| ≤50cc                      |                      |             |             |             | 1.25*         | 1.23 - 1.27 | 1.18*       | 1.15 - 1.20 |             |             |             |             |



|                                     | Two-wheeled vehicles |             |             |             | Motorcyclists |             |             |             | Bicyclist   |             |             |             |
|-------------------------------------|----------------------|-------------|-------------|-------------|---------------|-------------|-------------|-------------|-------------|-------------|-------------|-------------|
|                                     | Crude OR             | 95% CI      | Adjusted OR | 95% CI      | Crude OR      | 95% CI      | Adjusted OR | 95% CI      | Crude OR    | 95% CI      | Adjusted OR | 95% CI      |
| Drunk driving                       |                      |             |             |             |               |             |             |             |             |             |             |             |
| No (BAC <sup>a</sup> ≤0.03%)        | 1.00 (ref.)          |             | 1.00 (ref.) |             | 1.00 (ref.)   |             | 1.00 (ref.) |             | 1.00 (ref.) |             | 1.00 (ref.) |             |
| Yes (BAC <sup>a</sup> >0.03%)       | 3.75*                | 3.67 - 3.83 | 2.80*       | 2.73 - 2.87 | 3.91*         | 3.83 - 4.00 | 2.64*       | 2.58 - 2.71 | 1.69*       | 1.43 - 2.00 | 1.47*       | 1.23 - 1.75 |
| Helmet use                          |                      |             |             |             |               |             |             |             |             |             |             |             |
| Yes                                 | 1.00 (ref.)          |             | 1.00 (ref.) |             | 1.00 (ref.)   |             | 1.00 (ref.) |             | 1.00 (ref.) |             | 1.00 (ref.) |             |
| No                                  | 2.10*                | 2.06 - 2.14 | 1.77*       | 1.74 - 1.81 | 2.27*         | 2.22 - 2.31 | 1.73*       | 1.69 - 1.77 | 1.40*       | 1.26 - 1.55 | 1.24*       | 1.12 - 1.38 |
| License                             |                      |             |             |             |               |             |             |             |             |             |             |             |
| Yes                                 | ---                  |             | ---         |             | 1.00 (ref.)   |             | 1.00 (ref.) |             | ---         |             | ---         |             |
| No                                  |                      |             |             |             | 2.05*         | 2.01 - 2.09 | 1.36*       | 1.33 - 1.39 |             |             |             |             |
| Path type                           |                      |             |             |             |               |             |             |             |             |             |             |             |
| Straight road                       | 1.00 (ref.)          |             | 1.00 (ref.) |             | 1.00 (ref.)   |             | 1.00 (ref.) |             | 1.00 (ref.) |             | 1.00 (ref.) |             |
| Curved road                         | 1.43*                | 1.38 - 1.47 | 1.01        | 0.98 - 1.05 | 1.44*         | 1.39 - 1.49 | 1.00        | 0.96 - 1.03 | 1.21*       | 1.07 - 1.36 | 1.16*       | 1.03 - 1.32 |
| Crossroads/Roundabout               | 0.71*                | 0.70 - 0.72 | 0.90*       | 0.88 - 0.92 | 0.71*         | 0.70 - 0.72 | 0.90*       | 0.88 - 0.92 | 0.84*       | 0.80 - 0.89 | 0.94        | 0.87 - 1.00 |
| Lighting                            |                      |             |             |             |               |             |             |             |             |             |             |             |
| Daylight                            | 1.00 (ref.)          |             | 1.00 (ref.) |             | 1.00 (ref.)   |             | 1.00 (ref.) |             | 1.00 (ref.) |             | 1.00 (ref.) |             |
| Dusk or dawn                        | 1.76*                | 1.69 - 1.83 | 1.08*       | 1.03 - 1.12 | 1.75*         | 1.68 - 1.82 | 1.05*       | 1.00 - 1.09 | 1.56*       | 1.38 - 1.76 | 1.28*       | 1.13 - 1.45 |
| Road type                           |                      |             |             |             |               |             |             |             |             |             |             |             |
| Provincial highway                  | 1.00 (ref.)          |             | 1.00 (ref.) |             | 1.00 (ref.)   |             | 1.00 (ref.) |             | 1.00 (ref.) |             | 1.00 (ref.) |             |
| County road                         | 1.54*                | 1.50 - 1.57 | 0.98        | 0.94 - 1.01 | 1.53*         | 1.49 - 1.57 | 0.97        | 0.93 - 1.00 | 1.59*       | 1.47 - 1.73 | 1.06        | 0.94 - 1.20 |
| Others (Township road/Private road) | 0.59*                | 0.58 - 0.60 | 0.83*       | 0.81 - 0.85 | 0.59*         | 0.58 - 0.61 | 0.82*       | 0.80 - 0.85 | 0.60*       | 0.57 - 0.65 | 0.85*       | 0.77 - 0.94 |
| Road surface                        |                      |             |             |             |               |             |             |             |             |             |             |             |

|                                  | Two-wheeled vehicles |             |             |             | Motorcyclists |             |             |             | Bicyclist   |             |             |             |
|----------------------------------|----------------------|-------------|-------------|-------------|---------------|-------------|-------------|-------------|-------------|-------------|-------------|-------------|
|                                  | Crude OR             | 95% CI      | Adjusted OR | 95% CI      | Crude OR      | 95% CI      | Adjusted OR | 95% CI      | Crude OR    | 95% CI      | Adjusted OR | 95% CI      |
| Dry                              | 1.00 (ref.)          |             | 1.00 (ref.) |             | 1.00 (ref.)   |             | 1.00 (ref.) |             | 1.00 (ref.) |             | 1.00 (ref.) |             |
| Wet/Slippery                     | 0.83*                | 0.81 - 0.85 | 0.85*       | 0.83 - 0.87 | 0.82*         | 0.80 - 0.84 | 0.84*       | 0.81 - 0.86 | 0.97        | 0.89 - 1.06 | 1.01        | 0.93 - 1.11 |
| Road defect                      |                      |             |             |             |               |             |             |             |             |             |             |             |
| No                               | 1.00 (ref.)          |             | 1.00 (ref.) |             | 1.00 (ref.)   |             | 1.00 (ref.) |             | 1.00 (ref.) |             | 1.00 (ref.) |             |
| Yes                              | 1.33*                | 1.25 - 1.42 | 0.95        | 0.89 - 1.01 | 1.36*         | 1.28 - 1.44 | 0.96        | 0.90 - 1.03 | 1.16        | 0.87 - 1.56 | 1.00        | 0.74 - 1.36 |
| Barrier                          |                      |             |             |             |               |             |             |             |             |             |             |             |
| No                               | 1.00 (ref.)          |             | 1.00 (ref.) |             | 1.00 (ref.)   |             | 1.00 (ref.) |             | 1.00 (ref.) |             | 1.00 (ref.) |             |
| Yes                              | 1.12*                | 1.07 - 1.16 | 0.99        | 0.95 - 1.03 | 1.14*         | 1.09 - 1.18 | 0.99        | 0.95 - 1.03 | 0.89        | 0.76 - 1.05 | 0.92        | 0.78 - 1.09 |
| Traffic signal                   |                      |             |             |             |               |             |             |             |             |             |             |             |
| Yes                              | 1.00 (ref.)          |             | 1.00 (ref.) |             | 1.00 (ref.)   |             | 1.00 (ref.) |             | 1.00 (ref.) |             | 1.00 (ref.) |             |
| No                               | 1.31*                | 1.29 - 1.33 | 1.02        | 1.00 - 1.04 | 1.31*         | 1.29 - 1.33 | 1.03*       | 1.01 - 1.05 | 1.10*       | 1.04 - 1.17 | 0.93        | 0.87 - 1.00 |
| Separation of traffic directions |                      |             |             |             |               |             |             |             |             |             |             |             |
| Yes                              | 1.00 (ref.)          |             | 1.00 (ref.) |             | 1.00 (ref.)   |             | 1.00 (ref.) |             | 1.00 (ref.) |             | 1.00 (ref.) |             |
| No                               | 0.92*                | 0.90 - 0.93 | 1.21*       | 1.19 - 1.24 | 0.92*         | 0.91 - 0.94 | 1.21*       | 1.19 - 1.23 | 0.91*       | 0.86 - 0.96 | 1.09*       | 1.02 - 1.16 |
| Traffic island                   |                      |             |             |             |               |             |             |             |             |             |             |             |
| Yes                              | 1.00 (ref.)          |             | 1.00 (ref.) |             | 1.00 (ref.)   |             | 1.00 (ref.) |             | 1.00 (ref.) |             | 1.00 (ref.) |             |
| No                               | 0.82*                | 0.80 - 0.83 | 0.74*       | 0.73 - 0.76 | 0.82*         | 0.80 - 0.83 | 0.74*       | 0.73 - 0.76 | 0.84*       | 0.80 - 0.89 | 0.80*       | 0.75 - 0.86 |
| Crash type                       |                      |             |             |             |               |             |             |             |             |             |             |             |
| Multiple vehicle                 | 1.00 (ref.)          |             | 1.00 (ref.) |             | 1.00 (ref.)   |             | 1.00 (ref.) |             | 1.00 (ref.) |             | 1.00 (ref.) |             |
| Single vehicle                   | 2.34*                | 2.29 - 2.38 | 1.75*       | 1.71 - 1.79 | 2.42*         | 2.38 - 2.47 | 1.76*       | 1.72 - 1.79 | 1.68*       | 1.50 - 1.88 | 1.56*       | 1.38 - 1.76 |

<sup>a</sup>BAC: Blood alcohol concentration

239

240 The pooled model revealed that bicyclists were 18% significantly less likely to be  
241 hospitalised for head injuries than motorcyclists were (AOR=0.82; CI=0.79-0.85). Moreover,  
242 factors such as the females (AOR=1.08, CI=1.07-1.10), age 65 or above (AOR=1.23,  
243 CI=1.19-1.28), rural areas ((AOR=2.74, CI=2.66-2.83), BAC level>0.03% (AOR=2.80,  
244 CI=2.73-2.87), no use of a helmet (AOR=1.77, CI=1.74-1.81), darkness (AOR=1.08,  
245 CI=1.03-1.12), no separator of divided traffic direction (AOR=1.21, CI=1.19-1.24), and  
246 single-vehicle crash(AOR=1.75, CI=1.71-1.79) were found to be the most significantly  
247 associated with hospitalisation for head injuries.

248 The estimated crude and adjusted ORs (AORs) of the two separate models evaluating  
249 factors contributing to the hospitalisation of bicyclists and motorcyclists for head injuries  
250 were similar to those of the pooled model. Noteworthy results include that female  
251 motorcyclists (AOR=1.03) and elderly bicyclists and motorcyclists (AORs=1.92 and 1.23,  
252 respectively) were more likely to be hospitalised for head injuries. Accidents that occurred in  
253 rural areas were associated with a higher risk of hospitalisation for head injuries among  
254 bicyclists and motorcyclists (AORs=2.94 and 2.77, respectively). The odds of hospitalisation  
255 were higher in riders of mopeds who sustained head injuries than in heavy-motorcycles riders  
256 (AOR=1.18). Intoxicated bicyclists and motorcyclists had a higher risk of hospitalisation for  
257 head injuries (AORs=2.64 and 1.48, respectively). Riding without helmets was found to be a

1  
2  
3  
4 258 risk factor in both bicyclists and motorcyclists (AORs=1.24 and 1.73, respectively).  
5  
6

7 259 Motorcyclists travelling without a legal licence were more prone to be hospitalised for head  
8

9  
10 260 injuries (AOR=1.36). Furthermore, curved roadways and dusk or dawn were associated with  
11

12 261 an increased risks of hospitalisation for head injuries among bicyclists (AORs=1.16 and 1.28,  
13

14  
15 262 respectively).  
16  
17

18 263 The risk of hospitalisation for head injuries was higher among bicyclists and  
19

20 264 motorcyclists involved in MVCs that occurred on roadways without separation of traffic  
21

22 265 direction (AORs=1.09 and 1.21, respectively). Moreover, the risk of hospitalisation for head  
23

24 266 injuries was 56% and 76% (AORs=1.56 and 1.76, respectively) higher in bicyclists and  
25

26 267 motorcyclists involved in single-vehicle crashes than in those involved in multi-vehicle  
27

28 268 crashes.  
29

30  
31  
32  
33  
34  
35 269  
36  
37

## 38 270 **Discussions**

39  
40  
41 271  
42  
43

44 272 To ascertain the research hypotheses, the univariate results suggest that compared with  
45

46 273 motorcyclists, bicyclists sustaining head injuries were 59% more likely to be hospitalised.  
47

48  
49 274 However, the results of multivariate logistic models revealed that compared with  
50

51 275 motorcyclists, bicyclists who sustained head injuries had an 18% decreased probability of  
52

53 276 being hospitalised. After the adjustment of this result for other factors, helmet use appeared to  
54  
55  
56  
57  
58  
59  
60

1  
2  
3  
4 277 be beneficial in reducing the risks of hospitalisation for head injuries among bicyclists.  
5  
6

7 278 The National Traffic Accident Dataset and the NHIRD are both national datasets that  
8  
9  
10 279 cover 99.9% of populations. This is a comprehensive study using the linked data from these  
11  
12 280 two datasets which facilitate the determination of various factors associated with an increased  
13  
14  
15 281 risk of hospitalisation for head injuries among bicyclists and motorcyclists in Taiwan. The  
16  
17  
18 282 conclusions drawn from the current research can therefore be more reliable than other studies  
19  
20  
21 283 that solely used a single dataset.  
22  
23

24 284 Our finding underscores the importance of helmet use in reducing hospitalisation due to  
25  
26  
27 285 head injuries among bicyclists while current helmet use is relatively low. Also, additional  
28  
29  
30 286 interventions such as education and campaigns should aim to increase riders' awareness of  
31  
32  
33 287 other factors that were found to influence head-injury related hospitalisations. Together with  
34  
35  
36 288 helmet law, these additional interventions can further reduce head-injury related  
37  
38  
39 289 hospitalisation not only for bicyclists but also for motorcyclists.  
40

41 290 The current research is limited by the fact that death data are not explicitly recorded in the  
42  
43  
44 291 NHIRD. Patients would die even if they are hospitalised. Unfortunately no such data is  
45  
46  
47 292 available from the NHIRD – these patients are recorded as “hospitalisation” instead of  
48  
49  
50 293 “deaths”. Future research may attempt to obtain death data that are unavailable from the  
51  
52  
53 294 NHIRD, which would open up additional analysis possibilities and allow more precise model  
54  
55  
56 295 estimation.  
57  
58  
59  
60

1  
2  
3  
4 296 Compared with motorcyclists, bicyclists sustaining head injuries were found to have  
5  
6  
7 297 higher risks of hospitalisation; however, after the adjustment of this result for other factors in  
8  
9  
10 298 the multivariate analysis, bicyclists have lower risks of hospitalisation. The results here have  
11  
12 299 important implications for policymakers. In 2016, bicycle helmet use became compulsory for  
13  
14 300 electric bicycle users but not for traditional bicycle users in Taiwan. A large-scale nationwide  
15  
16 301 travel survey<sup>24</sup> reported that helmet use was relatively lower among bicyclists (6.8%) than  
17  
18 302 among motorcyclists (82.2%). Because the use of electric bicycles (with higher velocities that  
19  
20 303 may exacerbate crash impacts and injury outcomes) and racing bikes (which have been widely  
21  
22 304 used for recreational purpose and travelling between cities) has been increasing in recent  
23  
24 305 years, the government should consider encouraging helmets for all bicycles. Further research  
25  
26 306 can therefore be conducted once bicycle helmet use becomes more popular.

27  
28  
29  
30 307 In this study, two additional logistic models for bicyclists and motorcyclists were  
31  
32 308 estimated. The results revealed that contributory factors to hospitalisation for head injuries are  
33  
34 309 similar among bicyclists and motorcyclists. For instance, dusk or dawn was associated with a  
35  
36 310 higher risk of hospitalisation for head injuries among bicyclists and motorcyclists. The result  
37  
38 311 here adds to existing literature of motorcycle and bicycle road safety by concluding that  
39  
40 312 diminished light conditions are associated not only with accident occurrence<sup>25 26</sup> but also with  
41  
42 313 head injury-related hospitalisation. It seems clear here that enhancing conspicuity, in  
43  
44 314 particular in diminished light conditions, may be an effective countermeasure to reduce both  
45  
46  
47  
48  
49  
50  
51  
52  
53  
54  
55  
56  
57  
58  
59  
60

1  
2  
3  
4 315 accident risk and its consequences.  
5  
6

7 316 Our regression models revealed that the risk of hospitalisation is higher among elderly  
8  
9  
10 317 bicyclists and motorcyclists who sustained head injuries. Such a finding is in agreement with  
11  
12 318 that of Ekman et al. (2001)<sup>27</sup>, who reported that the risk of head injuries is higher among  
13  
14  
15 319 elderly bicyclists than their younger counterparts. This may be attributable to the fact that  
16  
17  
18 320 compared with young people, elderly people tend to have more chronic diseases and can have  
19  
20  
21 321 more complications after head injuries, and the hospitalisation rates of elderly people can be  
22  
23  
24 322 higher after an accident<sup>28 29</sup>.  
25  
26

27 323 The risk of head injury-related hospitalisation was higher among bicyclists and  
28  
29  
30 324 motorcyclists involved in single-vehicle crashes. This finding may be attributable to higher  
31  
32  
33 325 crash velocities being common in single-vehicle crashes<sup>30</sup>, and helmet use being less common  
34  
35  
36 326 in rural areas where single-vehicle crashes usually occur<sup>31</sup>. Speed management schemes that  
37  
38  
39 327 target all motorised vehicles in general and motorcycles and bicycles (e.g., electric bicycles  
40  
41  
42 328 that now in general may travel at more than 25 km/h<sup>32</sup>) in particular may constitute effective  
43  
44  
45 329 countermeasures for reducing hospitalisation rates for head injuries.  
46

47 330 Head injury-related hospitalisation was found to be associated with accidents that  
48  
49  
50 331 occurred in rural areas. This may be because of increasing kinetic energy and greater impact  
51  
52  
53 332 at higher speeds in rural settings<sup>33 34</sup>. In addition, heads are more likely to be exposed without  
54  
55  
56 333 any protection as a result of helmets being less commonly used in rural areas. Such a  
57  
58  
59  
60

1  
2  
3  
4 334 conjecture is supported by the findings of past studies<sup>35</sup> on motorcycle helmet use that  
5  
6  
7 335 concluded that compared with riders in cities, riders in rural areas were 7 times less likely to  
8  
9  
10 336 wear helmets. In addition, a national survey administrated by the HPA<sup>24</sup> reported that the  
11  
12 337 bicycle helmet use rate in urbanised areas was 1.5 times higher than that in rural areas.  
13  
14  
15 338 Moreover, the requirement of additional time for emergency-vehicle response in rural areas  
16  
17  
18 339 and the lower availability of medical resources in such areas<sup>36</sup> predispose people with head  
19  
20  
21 340 injuries to hospitalisation.

22  
23  
24 341 The study results revealed that the risk of hospitalisation was higher in both bicyclists and  
25  
26  
27 342 motorcyclists who sustained injuries in MVCs on roadways where traffic directions were not  
28  
29  
30 343 separated. This may be because of higher crash velocities at such locations. The road sections  
31  
32  
33 344 may be wide, and speed limits may be higher for locations where the traffic is not divided by  
34  
35  
36 345 any traffic barrier. Therefore, head injuries resulting from accidents in these locations may  
37  
38  
39 346 require hospitalisation.

40  
41 347 Unanswered questions remained in the current research include what other factors may  
42  
43  
44 348 affect hospitalisation due to head injuries among bicyclists and motorcyclists. Future research  
45  
46  
47 349 may attempt to obtain these variables that are not available from the National Traffic Accident  
48  
49  
50 350 Dataset and the NHIRD. These factors include motorcycle and bicycle types (a greater  
51  
52  
53 351 classification of engine size and electric bicycles), traffic volume, geometric characteristics,  
54  
55  
56 352 and electronic device use (e.g., phone and MP3 players) that have been increasingly used  
57  
58  
59  
60



1  
2  
3  
4 353 when riding.  
5  
6

7 354  
8  
9

10 355  
11

12 356 **Acknowledgements:**  
13

14  
15 357 Pai CW contributes to data analysis, interpretation of the data, and final approval of the  
16

17  
18 358 version to be published.  
19

20  
21 359 Chen YC contributes to data analysis, and final approval of the version to be published.  
22

23  
24 360 Lin HY contributes to the design of the work, data analysis, interpretation of the data, drafting  
25

26  
27 361 the manuscript and final approval of the version to be published.  
28

29  
30 362 Chen PL contributes to the design of the work, data analysis, interpretation of the data,  
31

32  
33 363 drafting the manuscript and final approval of the version to be published.  
34

35  
36 364 The authors declare to have no conflict of interests.  
37

38  
39 365 This study was supported by a grant from the Health Promotion Administration, Ministry of  
40

41  
42 366 Health and Welfare, Executive Yuan, Taiwan (Grant number: E1030909-104).  
43

44  
45 367 The data sources used in the present study were the National Traffic Accident Dataset and the  
46

47  
48 368 National Health Insurance Research Database (NHIRD) from the Health and Welfare Data  
49

50  
51 369 Science Center, Ministry of Health and Welfare, Taiwan.  
52

53  
54 370 The National Traffic Accident Dataset and the National Health Insurance Research Database  
55

56  
57 371 (NHIRD), which are open to the researchers in Taiwan, are available from the Health and  
58  
59  
60

1  
2  
3  
4 372 Welfare Data Science Center (<http://dep.mohw.gov.tw/DOS/np-2497-113.html>). Only citizens  
5  
6  
7 373 of Taiwan who fulfil the requirements of conducting research projects are eligible to apply for  
8  
9  
10 374 the NHIRD and National Traffic Accident Dataset. The use of NHIRD and National Traffic  
11  
12 375 Accident Dataset are limited to research purposes only. Applicants must follow the  
13  
14  
15 376 Computer-Processed Personal Data Protection Law.  
16  
17  
18  
19  
20  
21  
22  
23  
24  
25  
26  
27  
28  
29  
30  
31  
32  
33  
34  
35  
36  
37  
38  
39  
40  
41  
42  
43  
44  
45  
46  
47  
48  
49  
50  
51  
52  
53  
54  
55  
56  
57  
58  
59  
60

377 **Reference**

378

- 379 1. Depreitere B, Van Lierde C, Maene S, et al. Bicycle-related head injury: a study of 86 cases.  
380 *Accident Analysis & Prevention* 2004;36(4):561-67.
- 381 2. Mayrose J. The effects of a mandatory motorcycle helmet law on helmet use and injury  
382 patterns among motorcyclist fatalities. *Journal of Safety Research* 2008;39(4):429-32.
- 383 3. Peng Y, Vaidya N, Finnie R, et al. Universal motorcycle helmet laws to reduce injuries: A  
384 community guide systematic review. *American Journal of Preventive Medicine*  
385 2017;52(6):820-832.
- 386 4. Chen PL. Statistics for injury surveillance: Health Promotion Administration, Ministry of  
387 Health and Welfare, 2015.
- 388 5. Ministry of Transportation and Communications. Traffic statistics of year 2014. In:  
389 Ministry of Transportation and Communications T, Republic of China., ed., 2015.
- 390 6. Chiu W-T, Chu S-F, Chang C-K, et al. Implementation of a motorcycle helmet law in  
391 Taiwan and traffic deaths over 18 years. *JAMA* 2011;306(3):267-68.
- 392 7. Ichikawa M, Chadbunchachai W, Marui E. Effect of the helmet act for motorcyclists in  
393 Thailand. *Accident Analysis & Prevention* 2003;35(2):183-89.
- 394 8. Supramaniam V, van Belle G, Sung JF. Fatal motorcycle accidents and helmet laws in  
395 peninsular Malaysia. *Accident Analysis & Prevention* 1984;16(3):157-62.
- 396 9. Passmore J, Tu NTH, Luong MA, et al. Impact of mandatory motorcycle helmet wearing  
397 legislation on head injuries in Viet Nam: results of a preliminary analysis. *Traffic*  
398 *injury prevention* 2010;11(2):202-06.
- 399 10. Servadei F, Begliomini C, Gardini E, et al. Effect of Italy's motorcycle helmet law on  
400 traumatic brain injuries. *Injury prevention* 2003;9(3):257-60.
- 401 11. Amoros E, Chiron M, Martin J-L, et al. Bicycle helmet wearing and the risk of head, face,  
402 and neck injury: a French case-control study based on a road trauma registry. *Injury*  
403 *Prevention* 2011:ip. 2011.031815.
- 404 12. Attewell RG, Glase K, McFadden M. Bicycle helmet efficacy: a meta-analysis. *Accident*  
405 *Analysis & Prevention* 2001;33(3):345-52.
- 406 13. Clarke CF. Evaluation of New Zealand's bicycle helmet law. *The New Zealand Medical*  
407 *Journal (Online)* 2012;125(1349)
- 408 14. Macpherson A, Spinks A. Bicycle helmet legislation for the uptake of helmet use and  
409 prevention of head injuries (Review). *Cochrane Database of Systematic Reviews*  
410 2007;2
- 411 15. Dennis J, Potter B, Ramsay T, et al. The effects of provincial bicycle helmet legislation on  
412 helmet use and bicycle ridership in Canada. *Injury Prevention* 2010;16(4):219-24.
- 413 16. Walter SR, Olivier J, Churches T, et al. The impact of compulsory cycle helmet legislation

- 1  
2  
3 414 on cyclist head injuries in New South Wales, Australia. *Accident Analysis &*  
4 415 *Prevention* 2011;43(6):2064-71.
- 5  
6 416 17. Bambach MR, Mitchell R, Grzebieta RH, et al. The effectiveness of helmets in bicycle  
7 417 collisions with motor vehicles: A case-control study. *Accident Analysis & Prevention*  
8 418 2013;53:78-88.
- 9  
10 419 18. Olofsson E, Bunketorp O, Andersson A-L. Helmet use and injuries in children's bicycle  
11 420 crashes in the Gothenburg region. *Safety Science* 2017;92:311-17.
- 12  
13 421 19. Bonander C, Nilson F, Andersson R. The effect of the Swedish bicycle helmet law for  
14 422 children: an interrupted time series study. *Journal of safety research* 2014;51:15-22.
- 15  
16 423 20. Povey LJ, Frith W, Graham P. Cycle helmet effectiveness in New Zealand. *Accident*  
17 424 *Analysis & Prevention* 1999;31(6):763-70.
- 18  
19 425 21. Scuffham P, Alsop J, Cryer C, et al. Head injuries to bicyclists and the New Zealand  
20 426 bicycle helmet law. *Accident Analysis & Prevention* 2000;32(4):565-73.
- 21  
22 427 22. Chen PL, Jou RC, Saleh W, et al. Accidents involving pedestrians with their backs to  
23 428 traffic or facing traffic: an evaluation of crash characteristics and injuries. *Journal of*  
24 429 *Advanced Transportation* 2016;50(5):736-51.
- 25  
26 430 23. Sun Y, Chang Y-H, Chen H-F, et al. Risk of Parkinson disease onset in patients with  
27 431 diabetes. *Diabetes care* 2012;35(5):1047-49.
- 28  
29 432 24. Administration) HHP. Nation Health Interview Survey 2013. In: Health Promotion  
30 433 Administration MoHaW, ed., 2013.
- 31  
32 434 25. Pai C-W. Motorcycle right-of-way accidents—A literature review. *Accident Analysis &*  
33 435 *Prevention* 2011;43(3):971-82.
- 34  
35 436 26. Wood JM, Tyrrell RA, Marszalek R, et al. Bicyclists overestimate their own night-time  
36 437 conspicuity and underestimate the benefits of retroreflective markers on the moveable  
37 438 joints. *Accident Analysis & Prevention* 2013;55:48-53.
- 38  
39 439 27. Ekman R, Welander G, Svanström L, et al. Bicycle-related injuries among the elderly—a  
40 440 new epidemic? *Public Health* 2001;115(1):38-43.
- 41  
42 441 28. Cook LJ, Knight S, Olson LM, et al. Motor vehicle crash characteristics and medical  
43 442 outcomes among older drivers in Utah, 1992-1995. *Annals of emergency medicine*  
44 443 2000;35(6):585-91.
- 45  
46 444 29. Rakotonirainy A, Steinhardt D, Delhomme P, et al. Older drivers' crashes in Queensland,  
47 445 Australia. *Accident Analysis & Prevention* 2012;48:423-29.
- 48  
49 446 30. Clabaux N, Brenac T, Perrin C, et al. Motorcyclists' speed and "looked-but-failed-to-see"  
50 447 accidents. *Accident Analysis & Prevention* 2012;49:73-77.
- 51  
52 448 31. Russo BJ, Barrette TP, Morden J, et al. Examination of factors associated with use rates  
53 449 after transition from a universal to partial motorcycle helmet use law. *Traffic Injury*  
54 450 *Prevention* 2017;18(1):95-101.
- 55  
56 451 32. Langford BC, Chen J, Cherry CR. Risky riding: Naturalistic methods comparing safety  
57 452 behavior from conventional bicycle riders and electric bike riders. *Accident Analysis*

1  
2  
3  
4  
5  
6  
7  
8  
9  
10  
11  
12  
13  
14  
15  
16  
17  
18  
19  
20  
21  
22  
23  
24  
25  
26  
27  
28  
29  
30  
31  
32  
33  
34  
35  
36  
37  
38  
39  
40  
41  
42  
43  
44  
45  
46  
47  
48  
49  
50  
51  
52  
53  
54  
55  
56  
57  
58  
59  
60

453                    & *Prevention* 2015;82:220-26.

454

455 33. Pai C-W, Saleh W. Exploring motorcyclist injury severity in approach-turn collisions at  
456 T-junctions: Focusing on the effects of driver's failure to yield and junction control  
457 measures. *Accident Analysis & Prevention* 2008;40(2):479-86.

458 34. Broughton J. Car occupant and motorcyclist deaths, 1994-20022005.

459 35. Akaateba MA, Amoh-Gyimah R, Yakubu I. A cross-sectional observational study of  
460 helmet use among motorcyclists in Wa, Ghana. *Accident Analysis & Prevention*  
461 2014;64:18-22.

462 36. Noland R, Quddus M. Analysis of pedestrian and bicycle casualties with regional panel  
463 data. *Transportation Research Record: Journal of the Transportation Research Board*  
464 2004(1897):28-33.

465

peer review only

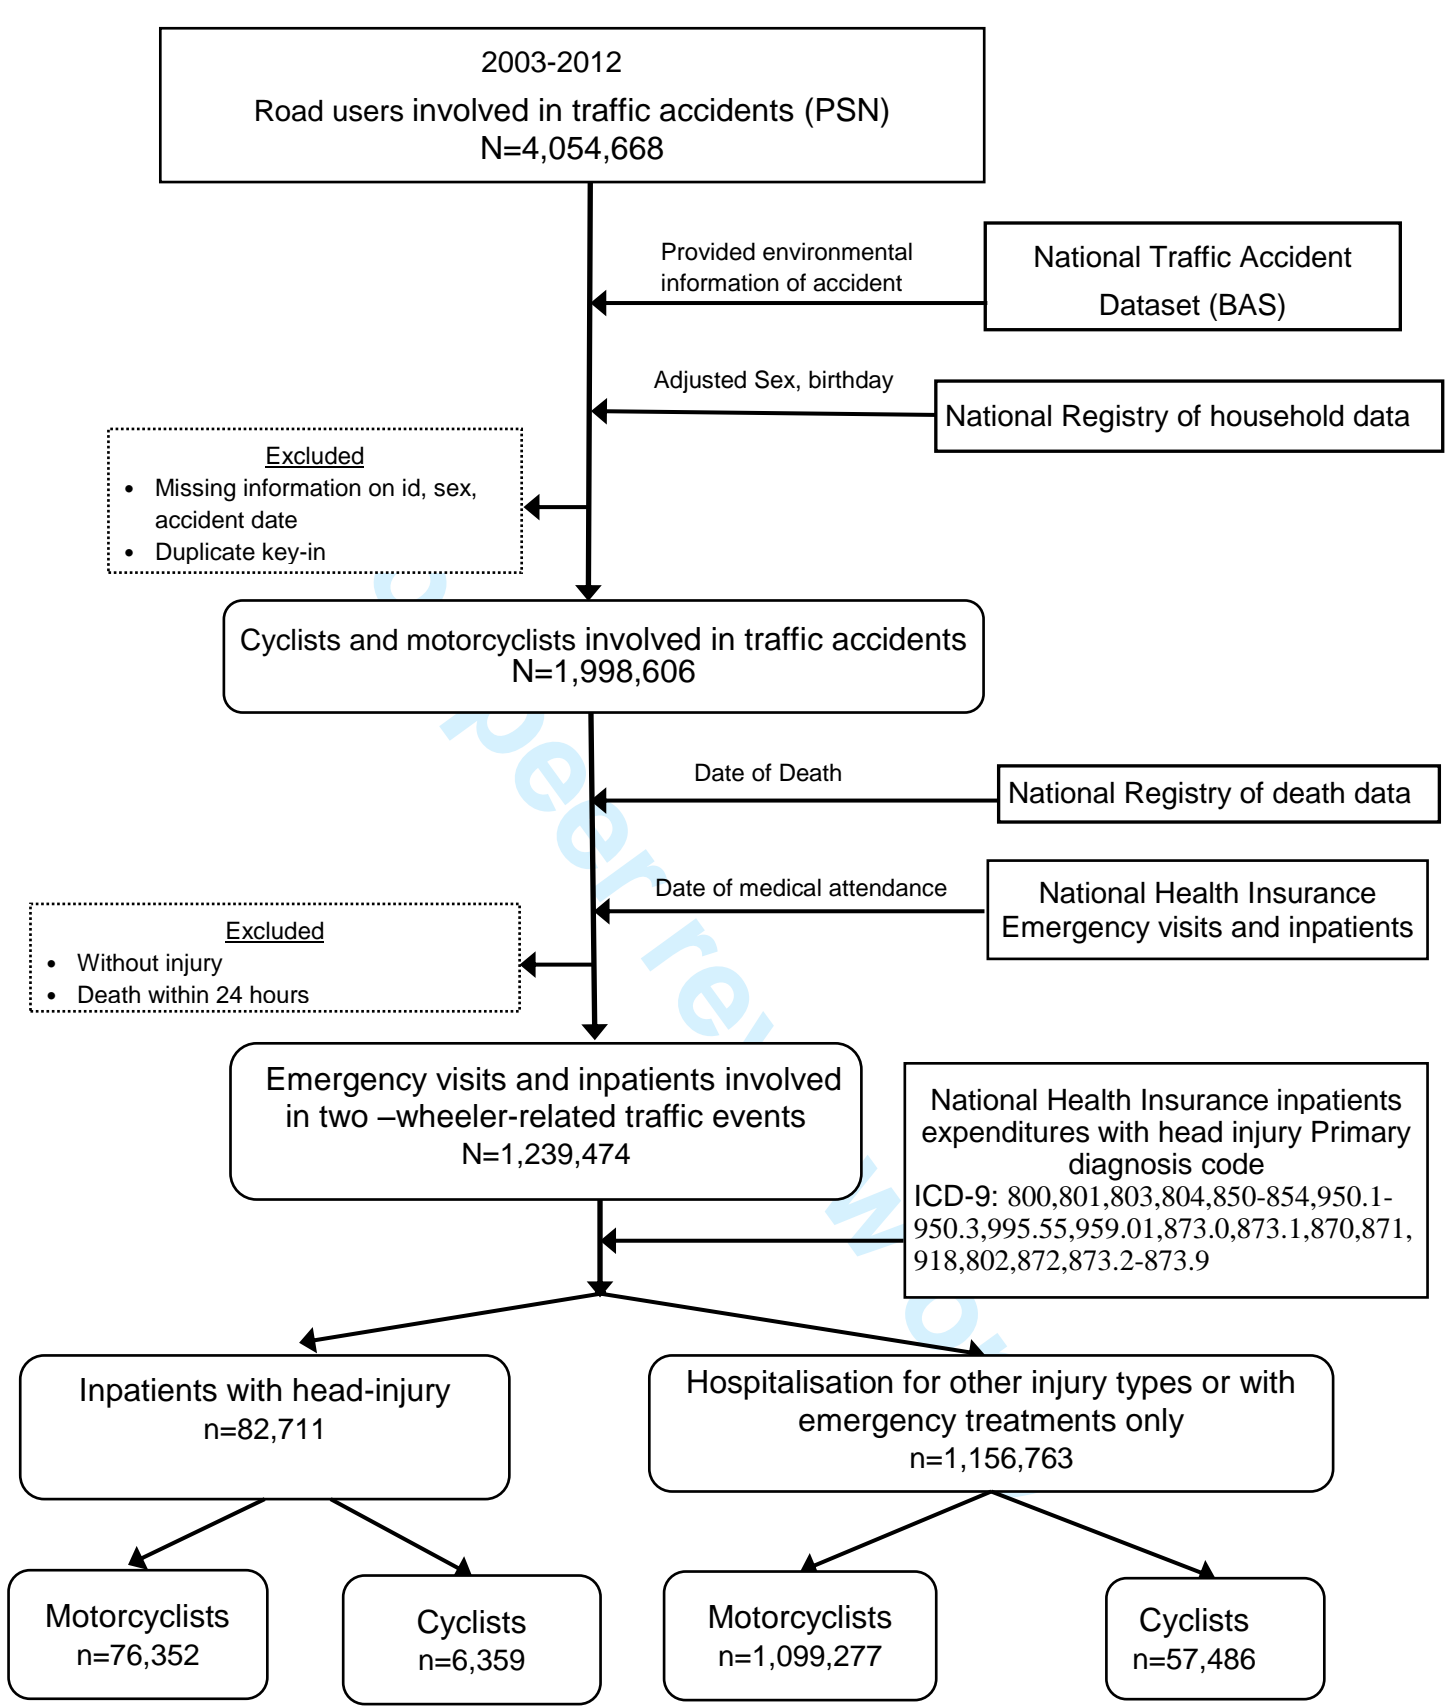

Appendix 1. Study flow diagram

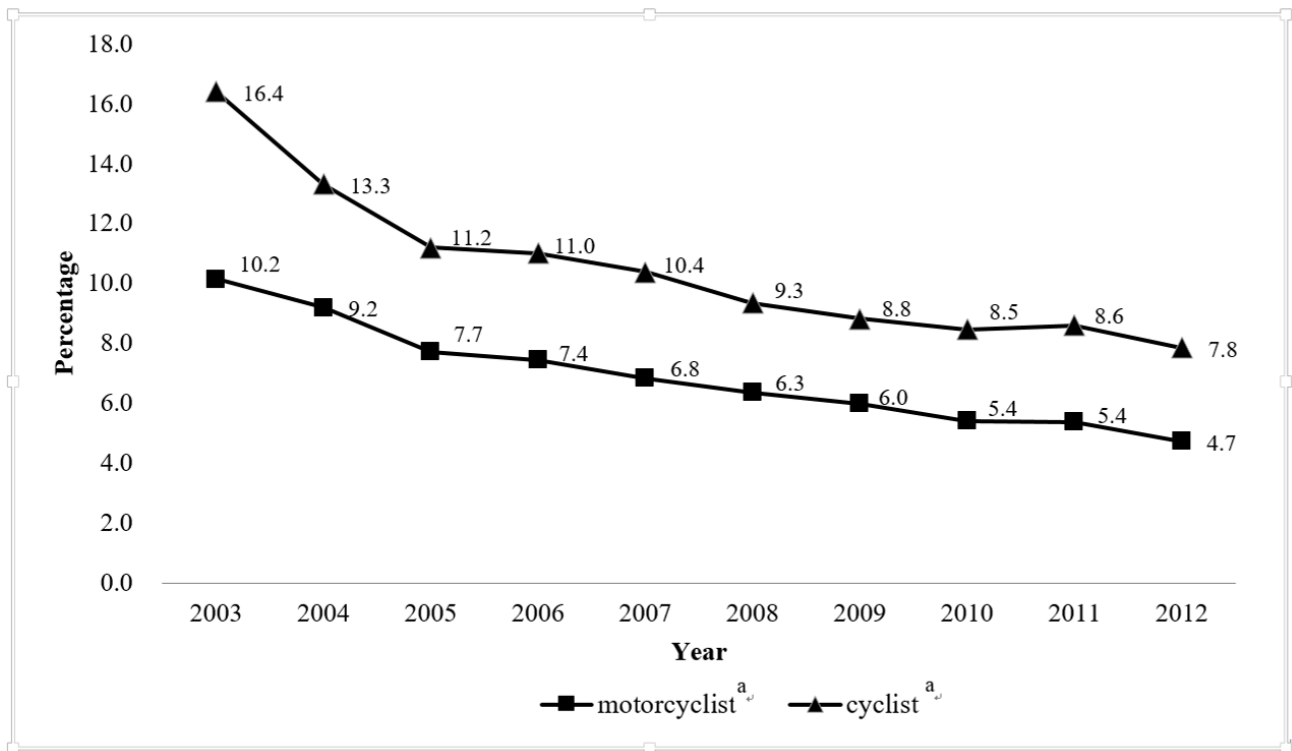

Appendix 2. Trend of head injuries among two-wheeler riders involved in all emergency and inpatient visits for two-wheeler traffic accidents.

<sup>a</sup> :significantly decreasing according to the Mann-Kendall trend test

## STROBE Statement—checklist of items that should be included in reports of observational studies

|                           | Item No | Recommendation                                                                                                                                                                                                                                                                                                      | Page  |
|---------------------------|---------|---------------------------------------------------------------------------------------------------------------------------------------------------------------------------------------------------------------------------------------------------------------------------------------------------------------------|-------|
| <b>Title and abstract</b> | 1       | (a) Indicate the study's design with a commonly used term in the title or the abstract                                                                                                                                                                                                                              | 2     |
|                           |         | (b) Provide in the abstract an informative and balanced summary of what was done and what was found                                                                                                                                                                                                                 | 2     |
| <b>Introduction</b>       |         |                                                                                                                                                                                                                                                                                                                     |       |
| Background/rationale      | 2       | Explain the scientific background and rationale for the investigation being reported                                                                                                                                                                                                                                | 6-8   |
| Objectives                | 3       | State specific objectives, including any prespecified hypotheses                                                                                                                                                                                                                                                    | 8     |
| <b>Methods</b>            |         |                                                                                                                                                                                                                                                                                                                     |       |
| Study design              | 4       | Present key elements of study design early in the paper                                                                                                                                                                                                                                                             | 9     |
| Setting                   | 5       | Describe the setting, locations, and relevant dates, including periods of recruitment, exposure, follow-up, and data collection                                                                                                                                                                                     | 9-11  |
| Participants              | 6       | (a) <i>Cohort study</i> —Give the eligibility criteria, and the sources and methods of selection of participants. Describe methods of follow-up                                                                                                                                                                     | 10-11 |
|                           |         | <i>Case-control study</i> —Give the eligibility criteria, and the sources and methods of case ascertainment and control selection. Give the rationale for the choice of cases and controls<br><i>Cross-sectional study</i> —Give the eligibility criteria, and the sources and methods of selection of participants |       |
| Variables                 | 7       | (b) <i>Cohort study</i> —For matched studies, give matching criteria and number of exposed and unexposed<br><i>Case-control study</i> —For matched studies, give matching criteria and the number of controls per case                                                                                              | N/A   |
|                           |         | Clearly define all outcomes, exposures, predictors, potential confounders, and effect modifiers. Give diagnostic criteria, if applicable                                                                                                                                                                            | 11-12 |
| Data sources/measurement  | 8*      | For each variable of interest, give sources of data and details of methods of assessment (measurement). Describe comparability of assessment methods if there is more than one group                                                                                                                                | 9-12  |
| Bias                      | 9       | Describe any efforts to address potential sources of bias                                                                                                                                                                                                                                                           | 9     |
| Study size                | 10      | Explain how the study size was arrived at                                                                                                                                                                                                                                                                           | 10-11 |
| Quantitative variables    | 11      | Explain how quantitative variables were handled in the analyses. If applicable, describe which groupings were chosen and why                                                                                                                                                                                        | 11-12 |
| Statistical methods       | 12      | (a) Describe all statistical methods, including those used to control for confounding                                                                                                                                                                                                                               | 12    |
|                           |         | (b) Describe any methods used to examine subgroups and interactions                                                                                                                                                                                                                                                 | N/A   |
|                           |         | (c) Explain how missing data were addressed                                                                                                                                                                                                                                                                         | 10-11 |
|                           |         | (d) <i>Cohort study</i> —If applicable, explain how loss to follow-up was addressed<br><i>Case-control study</i> —If applicable, explain how matching of cases and controls was addressed<br><i>Cross-sectional study</i> —If applicable, describe analytical methods taking                                        | 10-11 |



1  
2  
3  
4  
5  
6  
7  
8  
9  
10  
11  
12  
13  
14  
15  
16  
17  
18  
19  
20  
21  
22  
23  
24  
25  
26  
27  
28  
29  
30  
31  
32  
33  
34  
35  
36  
37  
38  
39  
40  
41  
42  
43  
44  
45  
46  
47  
48  
49  
50  
51  
52  
53  
54  
55  
56  
57  
58  
59  
60

account of sampling strategy

(e) Describe any sensitivity analyses

N/A

Continued on next page

For peer review only

| <b>Results</b>           |     |                                                                                                                                                                                                              |            |
|--------------------------|-----|--------------------------------------------------------------------------------------------------------------------------------------------------------------------------------------------------------------|------------|
| Participants             | 13* | (a) Report numbers of individuals at each stage of study—eg numbers potentially eligible, examined for eligibility, confirmed eligible, included in the study, completing follow-up, and analysed            | 8-9        |
|                          |     | (b) Give reasons for non-participation at each stage                                                                                                                                                         | N/A        |
|                          |     | (c) Consider use of a flow diagram                                                                                                                                                                           | Appendix 1 |
| Descriptive data         | 14* | (a) Give characteristics of study participants (eg demographic, clinical, social) and information on exposures and potential confounders                                                                     | 11         |
|                          |     | (b) Indicate number of participants with missing data for each variable of interest                                                                                                                          | 8          |
|                          |     | (c) <i>Cohort study</i> —Summarise follow-up time (eg, average and total amount)                                                                                                                             | N/A        |
| Outcome data             | 15* | <i>Cohort study</i> —Report numbers of outcome events or summary measures over time                                                                                                                          | N/A        |
|                          |     | <i>Case-control study</i> —Report numbers in each exposure category, or summary measures of exposure                                                                                                         | N/A        |
|                          |     | <i>Cross-sectional study</i> —Report numbers of outcome events or summary measures                                                                                                                           | 8-9, 11    |
| Main results             | 16  | (a) Give unadjusted estimates and, if applicable, confounder-adjusted estimates and their precision (eg, 95% confidence interval). Make clear which confounders were adjusted for and why they were included | 19-24      |
|                          |     | (b) Report category boundaries when continuous variables were categorized                                                                                                                                    | N/A        |
|                          |     | (c) If relevant, consider translating estimates of relative risk into absolute risk for a meaningful time period                                                                                             | N/A        |
| Other analyses           | 17  | Report other analyses done—eg analyses of subgroups and interactions, and sensitivity analyses                                                                                                               | N/A        |
| <b>Discussion</b>        |     |                                                                                                                                                                                                              |            |
| Key results              | 18  | Summarise key results with reference to study objectives                                                                                                                                                     | 24-25      |
| Limitations              | 19  | Discuss limitations of the study, taking into account sources of potential bias or imprecision. Discuss both direction and magnitude of any potential bias                                                   | 27         |
| Interpretation           | 20  | Give a cautious overall interpretation of results considering objectives, limitations, multiplicity of analyses, results from similar studies, and other relevant evidence                                   | 25-27      |
| Generalisability         | 21  | Discuss the generalisability (external validity) of the study results                                                                                                                                        | N/A        |
| <b>Other information</b> |     |                                                                                                                                                                                                              |            |
| Funding                  | 22  | Give the source of funding and the role of the funders for the present study and, if applicable, for the original study on which the present article is based                                                | 28         |

\*Give information separately for cases and controls in case-control studies and, if applicable, for exposed and unexposed groups in cohort and cross-sectional studies.

**Note:** An Explanation and Elaboration article discusses each checklist item and gives methodological background and published examples of transparent reporting. The STROBE checklist is best used in conjunction with this article (freely available on the Web sites of PLoS Medicine at <http://www.plosmedicine.org/>, Annals of Internal Medicine at <http://www.annals.org/>, and Epidemiology at <http://www.epidem.com/>). Information on the STROBE Initiative is available at [www.strobe-statement.org](http://www.strobe-statement.org).

# BMJ Open

## A population-based case-control study of hospitalisation due to head injuries among bicyclists and motorcyclists in Taiwan

|                                 |                                                                                                                                                                                                                                                                                                                                                                                                                                             |
|---------------------------------|---------------------------------------------------------------------------------------------------------------------------------------------------------------------------------------------------------------------------------------------------------------------------------------------------------------------------------------------------------------------------------------------------------------------------------------------|
| Journal:                        | <i>BMJ Open</i>                                                                                                                                                                                                                                                                                                                                                                                                                             |
| Manuscript ID                   | bmjopen-2017-018574.R3                                                                                                                                                                                                                                                                                                                                                                                                                      |
| Article Type:                   | Research                                                                                                                                                                                                                                                                                                                                                                                                                                    |
| Date Submitted by the Author:   | 11-Oct-2017                                                                                                                                                                                                                                                                                                                                                                                                                                 |
| Complete List of Authors:       | Pai, Chih-Wei; Taipei Medical University, College of Public Health , Graduate Institute of Injury Prevention and Control<br>Chen, Yi-Chu; Graduate Institute of Public Health, College of Public Health, Taipei Medical University<br>Lin, Hsiao-Yu; Taipei Medical University Hospital, Department of Urology<br>Chen, Ping-Ling; Taipei Medical University, College of Public Health, Graduate Institute of Injury Prevention and Control |
| <b>Primary Subject Heading</b>: | Public health                                                                                                                                                                                                                                                                                                                                                                                                                               |
| Secondary Subject Heading:      | Emergency medicine, Epidemiology                                                                                                                                                                                                                                                                                                                                                                                                            |
| Keywords:                       | ACCIDENT & EMERGENCY MEDICINE, PUBLIC HEALTH, TRAUMA MANAGEMENT                                                                                                                                                                                                                                                                                                                                                                             |
|                                 |                                                                                                                                                                                                                                                                                                                                                                                                                                             |

SCHOLARONE™  
Manuscripts

1  
2  
3  
4 **1 A population-based case-control study of hospitalisation due to head injuries**  
5  
6  
7 **2 among bicyclists and motorcyclists in Taiwan**  
8  
9  
10  
11  
12  
13  
14

4 Chih-Wei Pai<sup>a</sup>; Yi-Chu Chen<sup>b</sup>; Hsiao-Yu Lin<sup>c,\*</sup>; Ping-Ling Chen<sup>a,\*</sup>

5 <sup>a</sup> Graduate Institute of Injury Prevention and Control, College of Public Health, Taipei  
6 Medical University. Taiwan ROC

7 <sup>b</sup> Graduate Institute of Public Health, College of Public Health, Taipei Medical  
8 University. Taiwan ROC

9 <sup>c</sup> Department of Urology, Taipei Medical University Hospital. Taiwan ROC

10 \* Corresponding authors, these authors contributed equally to this work

11 Email: [ablin@tmu.edu.tw](mailto:ablin@tmu.edu.tw) (HYL); [plchen@tmu.edu.tw](mailto:plchen@tmu.edu.tw) (PLC)

12 +886 02-27361661 ext.6582

13 Address: Graduate Institute of Injury Prevention and Control, College of Public  
14 Health, Taipei Medical University, 250 Wuxing St, Taipei City, Taiwan 110.

15

16 **Word count: 3300**

17

1  
2  
3  
4 18 **Abstract**  
5

6  
7 19 **Introduction**  
8

9  
10 20 According to official statistics in Taiwan, the main body region of injury causing  
11  
12 21 bicyclist deaths was the head, and bicyclists were 2.6 times more likely to be fatally  
13  
14  
15 22 injured than motorcyclists were. There is currently a national helmet law for  
16  
17  
18 23 motorcyclists but not for bicyclists.  
19

20  
21 24 **Objectives**  
22

23  
24 25 The primary aim of this study was to determine whether bicyclist casualties,  
25  
26  
27 26 compared with motorcyclists, have higher odds of head-related hospitalisation. This  
28  
29  
30 27 study also aims to investigate the determinants of head-injury related hospitalisation  
31  
32  
33 28 among bicyclists and motorcyclists, respectively.  
34

35  
36 29 **Methods**  
37

38  
39 30 Using linked data of the National Traffic Accident Dataset and the National Health  
40  
41  
42 31 Insurance Research Database for the period between 2003 and 2012, this study  
43  
44  
45 32 investigates the crash characteristics of bicyclist and motorcyclist casualties presented  
46  
47  
48 33 to hospitals due to motor vehicle crashes. Head injury-related hospitalisation was used  
49  
50  
51 34 as the study outcome for both road users to evaluate whether various factors (e.g.  
52  
53  
54 35 human attributes, road and weather conditions, and vehicle characteristics) are related  
55  
56  
57 36 to hospital admission of those who sustained serious injuries.  
58  
59  
60

1  
2  
3  
4 37 **Results**  
5

6 38 A total of 1239474 bicyclist and motorcyclist casualties, the proportion of bicyclists  
7  
8  
9 39 hospitalised for head injuries was higher than that of motorcyclists (10.0% vs. 6.5%).  
10  
11  
12 40 However, the multiple logistic regression model shows that after the adjustment of  
13  
14  
15 41 this result for other factors such as helmet use, bicyclists were 18% significantly less  
16  
17  
18 42 likely to be hospitalised for head injuries than motorcyclists were (AOR=0.82;  
19  
20  
21 43 CI=0.79-0.85). Other important determinants of head-injury related hospitalisation for  
22  
23  
24 44 bicyclists and motorcyclists include female riders, elderly riders, crashes that occurred  
25  
26  
27 45 in rural areas, moped riders, riding unhelmeted, intoxicated bicyclists and  
28  
29  
30 46 motorcyclists, unlicensed motorcyclists, dusk and dawn conditions, and single-vehicle  
31  
32  
33 47 crashes.  
34

35  
36 48 **Conclusions**  
37

38 49 Our finding underscores the importance of helmet use in reducing hospitalisation due  
39  
40  
41 50 to head injuries among bicyclists while current helmet use is relatively low.  
42  
43

44  
45 51

46  
47 52 **Keywords:** Bicyclist and motorcyclist; Head injury; Hospitalisation; Crashes  
48  
49

50  
51 53  
52  
53  
54  
55  
56  
57  
58  
59  
60

1  
2  
3  
4 54 **Strengths and limitations of this study**  
5

6  
7 55 ■ This is a comprehensive study using the linked data from these two datasets

8  
9  
10 56 which cover 99.9% of populations.

11  
12 57 ■ Our results derived from the linked datasets can be more reliable than those

13  
14  
15 58 using a single database alone.

16  
17  
18 59 ■ Hospitalisation data can be more clinically reliable than injury-severity data

19  
20  
21 60 that are commonly adopted in past studies.

22  
23  
24 61 ● The study is limited by the data that are unavailable from the two datasets such

25  
26  
27 62 as electronic device use (e.g., phone and MP3 players).

28  
29  
30 63

1  
2  
3  
4 64 **Introduction**  
5  
6  
7 65  
8  
9  
10 66

11 Two-wheeled motor vehicle crashes involving bicyclists and motorcyclists have  
12 been a serious safety problem in Taiwan with regard to injury severity and frequency.  
13  
14 Studies have suggested that head injuries are the primary cause of deaths and  
15  
16 hospitalisation among bicyclists and motorcyclists<sup>1-3</sup>. A study reported that in Taiwan  
17  
18 bicyclists were 2.6 times more likely to be fatally injured than motorcyclists were<sup>4</sup>.  
19  
20  
21 The head (approximately 61%) was the main body part that sustained injury resulting  
22  
23  
24 in death of these bicyclists<sup>5</sup>. Head injuries among motorcyclists have become less  
25  
26  
27 problematic since the enforcement of the helmet use law for motorcyclists in 1997<sup>6</sup>.  
28  
29  
30 Chiu et al. (2011) investigated motorcycle head injuries one year after the  
31  
32  
33 enforcement of the helmet use law in Taiwan and reported a 33% reduction in head  
34  
35  
36 injuries<sup>6</sup>. Helmet use became mandatory for users of electric bicycles in 2016, but not  
37  
38  
39 for conventional bicycles.  
40  
41  
42  
43

44 78 According to official accident statistics (the National Traffic Accident dataset), the  
45  
46  
47 number of motorcycle accidents has been steadily decreasing; however, the number of  
48  
49  
50 bicycle accidents has been stably increasing. This is primarily attributable to the  
51  
52  
53 increasing popularity of bicycle use. For instance, several bike sharing programmes  
54  
55  
56 have been implemented in several metropolitan cities such as Taipei City and  
57  
58  
59  
60



1  
2  
3  
4 83 Taichuang City. In addition, the use of electric bicycles and racing bikes, which are  
5  
6  
7 84 widely used for recreational purposes and travelling between cities, has been  
8  
9  
10 85 increasing.

11  
12 86 Studies conducted mainly in Asian countries on helmet use and motorcyclist  
13  
14  
15 87 injuries have reported that helmet use and related laws have successfully reduced head  
16  
17  
18 88 injuries, thus reducing fatalities among motorcyclists. Ichiwaka et al. (2003) reported  
19  
20  
21 89 a 41% reduction in head injuries in Thailand 2 years after the implementation of a  
22  
23  
24 90 mandatory helmet use law<sup>7</sup>. A similar reduction in head injuries and fatalities has been  
25  
26  
27 91 reported in Malaysia<sup>8</sup>, Vietnam<sup>9</sup>, the United States<sup>3</sup>, and Italy<sup>10</sup> after the  
28  
29  
30 92 implementation of helmet use laws. Bicycle helmet use is a means of reducing  
31  
32  
33 93 morbidity and mortality among bike users. Several case-controlled studies have  
34  
35  
36 94 reported an association of helmet use with a decreased rate of head injury and mortality  
37  
38  
39 95 among riders of all ages, with bicycle helmets reducing the risk of head and brain  
40  
41  
42 96 injury by 65%-88%<sup>11</sup>. Moreover, Attewell et al. (2001)<sup>12</sup> conducted a meta-analysis of  
43  
44  
45 97 16 observational studies and reported that bicycle helmets can significantly reduce the  
46  
47  
48 98 risks of head injury by approximately 60%.

49  
50 99 Current efforts to increase helmet use in order to prevent head injuries in accidents  
51  
52  
53 100 include campaigns to increase awareness regarding the importance of helmet use,  
54  
55  
56 101 along with advocating helmet use laws. Over the last decades, mandatory bicycle  
57  
58  
59  
60

1  
2  
3  
4 102 helmet use laws have been implemented in several countries including Australia, New  
5  
6  
7 103 Zealand, Sweden, and Canada. A study indicated that helmet use laws act as a  
8  
9  
10 104 deterrent to cycling<sup>13</sup>. Other studies have similarly reported a decline in cycling due to  
11  
12 105 helmet-use law.<sup>14 15</sup>. In general, a positive effect of mandatory cycle helmet use laws  
13  
14  
15 106 on bicyclist head injuries has been observed in Australia<sup>16 17</sup>, Sweden<sup>18 19</sup>, and New  
16  
17  
18 107 Zealand<sup>20 21</sup>.

19  
20  
21 108 When reviewed together, literature has suggested that helmet use and related laws  
22  
23  
24 109 are beneficial for reducing head injuries and fatalities among bicyclists and  
25  
26  
27 110 motorcyclists.

28  
29  
30 111 In Taiwan, helmet use is mandatory for motorcyclists but not bicyclists. This leads  
31  
32  
33 112 to an important research question of whether bicyclists involved in motor vehicle  
34  
35  
36 113 crashes (MVCs: a crash occurs when a vehicle collides with other road users, or other  
37  
38  
39 114 stationary objects such as a tree, telegraphy, or traffic island), compared with  
40  
41  
42 115 motorcyclists, are more likely to be hospitalised due to head injuries. The primary aim  
43  
44  
45 116 of this study was to determine whether bicyclist casualties, compared with  
46  
47  
48 117 motorcyclists, have higher odds of head-related hospitalisation. Another important  
49  
50  
51 118 research hypothesis of the current research is that risk factors that influence  
52  
53  
54 119 head-injury related hospitalisation among bicyclists and motorcyclists may include  
55  
56  
57 120 helmet use, alcohol consumption, or license status etc. This study also aims to  
58  
59  
60

1  
2  
3  
4 121 investigate the determinants of head-injury related hospitalisation among bicyclists  
5  
6  
7 122 and motorcyclists, respectively.  
8  
9

10 123

## 11 12 124 **Materials and Methods**

13  
14  
15 125

### 16 17 126 *Data source*

18  
19  
20  
21 127 Two datasets, police-reported crash data provided by the National Police Agency,  
22  
23  
24 128 Ministry of the Interior, and the National Health Insurance Research Database  
25  
26  
27 129 (NHIRD) provided by the Health and Welfare Data Science Center, Ministry of  
28  
29  
30 130 Health and Welfare, were used in the present study. The National Traffic Accident  
31  
32  
33 131 Dataset is recorded by trained police accident investigators after an accident has been  
34  
35  
36 132 reported to police. The National Traffic Accident Dataset report forms comprise the  
37  
38  
39 133 following three files: accident, vehicle, and victim files. A thorough description of  
40  
41  
42 134 National Traffic Accident Dataset can be found in the study of Chen et al. (2016)<sup>22</sup>.

43  
44 135 The Bureau of National Health Insurance (BNHI) in Taiwan implemented the  
45  
46  
47 136 National Health Insurance (NHI) programme on 1 March, 1995, and the NHI covers  
48  
49  
50 137 99% of the resident of Taiwan. The NHIRD comprises the outpatient and inpatient  
51  
52  
53 138 claims data of all NHI beneficiaries, all hospitals and clinics are required to report to  
54  
55  
56 139 the BNHI on a monthly basis. The information obtained from the NHIRD can be  
57  
58  
59  
60

1  
2  
3  
4 140 considered complete and accurate<sup>23</sup> because the BNHI ensures the accuracy of claims  
5  
6  
7 141 files by performing periodical expert reviews on a random sample for every 50-100  
8  
9  
10 142 ambulatory and inpatient claims. The NHIRD contains data such as patients' age and  
11  
12  
13 143 gender, admission and discharge dates, care location, hospital level, treatment  
14  
15  
16 144 department, surgical procedures, medical expenditures, diagnosis of disease or injury  
17  
18  
19 145 (in accordance with International Classification of Diseases, Ninth Revision Clinical  
20  
21  
22 146 Modification [ICD-9-CM] N-codes), and cause of injury (in accordance with  
23  
24  
25 147 ICD-9-CM E-codes).

26  
27 148 ICD-9-CM N-codes 800 to 999 that report injury diagnoses were used for  
28  
29  
30 149 extracting injury data. Specifically, the following N-codes were used for extracting  
31  
32  
33 150 head-related injuries: 800, 801, 803, 804, 850-854, 950.1-950.3, 995.55, 959.01,  
34  
35  
36 151 873.0, 873.1, 870, 871, 918, 802, 872, 873.2-873.9. The encrypted personal  
37  
38  
39 152 identification data in the NHIRD were used to link externally the NHIRD dataset to  
40  
41  
42 153 the National Traffic Accident dataset. Patients' identification information that is used  
43  
44  
45 154 for linking the two datasets is encrypted by the Health and Welfare Data Science  
46  
47  
48 155 Center, Taiwan. No individual patient or casualty can be identified and therefore, our  
49  
50  
51 156 study was exempted from review by an institutional review board (IRB #:201409033).

52  
53 157 The flow chart of sample selection from the National Traffic Accident Dataset  
54  
55  
56 158 and the NHIRD is presented in supplementary appendix 1. The current research  
57  
58  
59  
60

1  
2  
3  
4 159 examined data for the period between 2003 and 2012. By linking the National Traffic  
5  
6  
7 160 Accident Dataset and the NHIRD, a total of 4054668 casualties involved in MVCs  
8  
9  
10 161 were identified. Among the 4054668 casualties, 1998606 were bicyclists and  
11  
12 162 motorcyclists involved in MVCs (after excluding missing data such as identification  
13  
14  
15 163 and sex data and remaining cases where victims were treated at different times). After  
16  
17  
18 164 removal of the cases where the individuals involved did not receive an injury  
19  
20  
21 165 diagnosis and where patients died within 24 hours, a total of 1239474 casualties were  
22  
23  
24 166 either hospitalised or admitted to emergency departments. Among these 1239474  
25  
26  
27 167 casualties, 82711 were hospitalised for head injuries (treated as cases), and 1156763  
28  
29  
30 168 were hospitalised for other injury types or received emergency treatment only (treated  
31  
32  
33 169 as controls).

34  
35  
36 170

37  
38 171 *Variable definitions*

39  
40  
41 172 The current study investigates the effects of demographic variables, temporal  
42  
43  
44 173 factors, road and environment characteristics, and crash factors on head injuries  
45  
46  
47 174 among bicyclist and motorcyclist casualties. Demographic data were collected for the  
48  
49  
50 175 casualties, namely gender (male and female); age (four groups: <18, 18-40, 41-64,  
51  
52  
53 176 and 65 or above); blood alcohol consumption (BAC) level ( $\leq 0.03\%$  or  $> 0.03\%$ );  
54  
55  
56 177 license status (yes: with a valid license, or no: without a valid license); helmet use  
57  
58  
59  
60

1  
2  
3  
4 178 (yes or no); and location (highly urbanised area, moderately urbanised area,  
5  
6  
7 179 boomtown, rural area). Vehicle attributes were the engine size ( $\leq 50$ cc and  $\geq 51$ cc or  
8  
9  
10 180 above) Road and environment factors were the following variables: path type (straight  
11  
12 181 road, curved road, or crossroads/ roundabout), lighting (daylight, dusk/ dawn); road  
13  
14  
15 182 type (provincial highway, county road, or others); road surface (dry, or wet/slippery);  
16  
17  
18 183 road defect (yes or no); barrier (yes or no); traffic signal (yes or no); separation of  
19  
20  
21 184 traffic direction (yes or no); and traffic island (yes or no). Crash characteristics were  
22  
23  
24 185 the crash type (multiple-vehicle crash or single-vehicle crash) and object type which  
25  
26  
27 186 was divided into fixed objects and unfix objects.

28  
29  
30 187

31  
32  
33 188 *Statistical analysis*

34  
35  
36 189 Trend of head-related injuries among two-wheeler riders due to MVCs is  
37  
38  
39 190 compared and the difference in hospitalisation percentages is tested with the  
40  
41  
42 191 Mann-Kendall trend test. Distribution of head-injury related hospitalisation and non  
43  
44  
45 192 head-injury related hospitalisation by a set of variables (e.g., human attributes,  
46  
47  
48 193 environmental factors, and vehicle characteristics) is reported. Chi-square tests are  
49  
50  
51 194 conducted for comparing hospitalised patients (for head-related injuries) with  
52  
53  
54 195 hospitalised ones (for other injuries). Because the dependent variable is binary  
55  
56  
57 196 (hospitalisation for head injuries vs. emergency treatment or hospitalisation for other  
58  
59  
60

1  
2  
3  
4 197 injury types), a logistic regression model was estimated to examine the determinants  
5  
6  
7 198 of hospitalisation for head injuries. A pooled logistic regression model was estimated:  
8  
9  
10 199 the first model of hospitalisation for head injuries included casualty type (bicyclists vs.  
11  
12  
13 200 motorcyclists) as one of the variables. In estimating the models, the variables that  
14  
15  
16 201 have significance level ( $p < 0.2$ ) in the univariate logistic regression models were then  
17  
18  
19 202 incorporated into the multivariate logistic regression models. VIF (variance inflation  
20  
21  
22 203 factor) was conducted to assess multicollinearity among the variables. Only  
23  
24  
25 204 confounding variables were included in the models. Two separate models were  
26  
27  
28 205 employed to examine the determinants of hospitalisation for head injuries among  
29  
30  
31 206 bicyclists and motorcyclists. These two models determined contributory factors that  
32  
33  
34 207 may be different across bicyclist and motorcyclist casualties.  
35  
36  
37  
38  
39 208

## 209 **Results**

40  
41  
42 210  
43  
44 211 We further illustrate the trend of head injuries sustained by bicyclists and  
45  
46  
47 212 motorcyclists who presented to the emergency rooms or were admitted to hospitals  
48  
49  
50 213 (see supplementary appendix 2). The trend of head injuries appeared to steadily  
51  
52  
53 214 decrease among these two groups: the percentage of head injuries decreased from  
54  
55  
56 215 16.4% and 10.2% in 2003 to 7.8% and 4.7% in 2012 among bicyclists and  
57  
58  
59  
60

1  
2  
3  
4 216 motorcyclists, respectively. The decreasing trend was statistically significant  
5  
6  
7 217 according to the Mann-Kendall trend test ( $p < 0.01$ ). Moreover, the risk of sustaining  
8  
9  
10 218 head injuries tended to be higher among bicyclists than among motorcyclists.

11  
12 Table 1 lists the N-codes for principal diagnoses of injuries to various body  
13  
14  
15 220 regions resulting in the hospitalisation of bicyclists and motorcyclists. Traumatic brain  
16  
17  
18 221 injury (TBI, 29.3%), lower leg and ankle fracture (12.3%), and shoulder and upper  
19  
20  
21 222 arm fracture (9.4%) were the top three injury types among motorcyclists. Furthermore,  
22  
23  
24 223 TBI (41.4%), lower leg and ankle fracture (10.7%), and forearm and elbow fracture  
25  
26  
27 224 (6.9%) were the top three injury types among bicyclists. The proportion of bicyclists  
28  
29  
30 225 diagnosed to sustain a TBI was higher than that of motorcyclists (41.4% vs. 29.3%).  
31  
32  
33  
34  
35  
36  
37  
38  
39  
40  
41  
42  
43  
44  
45  
46  
47  
48  
49  
50  
51  
52  
53  
54  
55  
56  
57  
58  
59  
60



Table 1: N-codes of principal diagnoses for injuries requiring hospitalization in two-wheeled vehicle crashes

| <u>Total</u>                             |       |      | <u>Motorcyclists</u>                     |       |      | <u>Bicyclists</u>                        |      |      |
|------------------------------------------|-------|------|------------------------------------------|-------|------|------------------------------------------|------|------|
| N-code                                   | N     | %    | N-code                                   | N     | %    | N-code                                   | N    | %    |
| Traumatic brain injury                   | 67464 | 30.0 | Traumatic brain injury                   | 61826 | 29.3 | Traumatic brain injury                   | 5638 | 41.4 |
| Lower leg and ankle fracture             | 27358 | 12.2 | Lower leg and ankle fracture             | 25908 | 12.3 | Lower leg and ankle fracture             | 1450 | 10.7 |
| Shoulder and upper arm fracture          | 20712 | 9.2  | Shoulder and upper arm fracture          | 19839 | 9.4  | Forearm and elbow fracture               | 939  | 6.9  |
| Forearm and elbow fracture               | 16782 | 7.5  | Forearm and elbow fracture               | 15843 | 7.5  | Shoulder and upper arm fracture          | 873  | 6.4  |
| Other head, face, and neck               | 15247 | 6.8  | Other head, face, and neck               | 14526 | 6.9  | Hip fracture                             | 743  | 5.5  |
| Upper leg and thigh fracture             | 10975 | 4.9  | Upper leg and thigh fracture             | 10528 | 5.0  | Other head, face, and neck               | 721  | 5.3  |
| Sternum/ribs/pelvis fracture             | 10888 | 4.8  | Sternum/ribs/pelvis fracture             | 10509 | 5.0  | Spinal fractures                         | 620  | 4.6  |
| Minor injuries: contusions and abrasions | 8640  | 3.8  | Minor injuries: contusions and abrasions | 8160  | 3.9  | Minor injuries: contusions and abrasions | 480  | 3.5  |
| Minor injuries: open wounds              | 7807  | 3.5  | Minor injuries: open wounds              | 7501  | 3.6  | Sternum/ribs/pelvis fracture             | 466  | 3.4  |
| Wrist/hand/finger fracture               | 6411  | 2.9  | Wrist/hand/finger fracture               | 6213  | 2.9  | Upper leg and thigh fracture             | 360  | 2.6  |
| Other injuries                           | 32592 | 14.5 | Other injuries                           | 30416 | 14.4 | Other injuries                           | 1317 | 9.7  |

222

223 Tables 2-4 summarise the human attributes, environmental factors, and vehicle  
224 characteristics of two-wheeler casualties with head-related injuries occurring between  
225 2003 and 2012. One of the noteworthy results includes that the proportion of  
226 bicyclists hospitalised for head injuries was higher than that of motorcyclists (10.0%  
227 vs. 6.5%). As reported in Table 2, there are interesting data on helmet use among  
228 injured bicyclists and motorcyclists, confirming what was stated in introduction:  
229 compared to the injured motorcyclists that had much higher helmet-use rate (91.57%),  
230 the injured bicyclists were less likely to wear helmet (8.93%) since there is no law  
231 requiring helmet use for bicyclists. Other noteworthy results from Tables 2-4 are not  
232 interpreted here for brevity.

Table 2: Characteristics of inpatients with head injury involved in two-wheeled vehicle crashes

|                               | Two-wheeled vehicles |      |          |      |          | Motorcyclists |      |          |      |          | Bicyclists |      |          |      |          |
|-------------------------------|----------------------|------|----------|------|----------|---------------|------|----------|------|----------|------------|------|----------|------|----------|
|                               | Cases                |      | Controls |      | <i>p</i> | Cases         |      | Controls |      | <i>p</i> | Cases      |      | Controls |      | <i>p</i> |
|                               | n                    | %    | n        | %    |          | n             | %    | n        | %    |          | n          | %    | n        | %    |          |
| Total                         | 82711                | 6.7  | 1156763  | 93.3 |          | 76352         | 6.5  | 1099277  | 93.5 |          | 6359       | 10.0 | 57486    | 90.0 | <0.001   |
| Gender                        |                      |      |          |      |          |               |      |          |      |          |            |      |          |      |          |
| Male                          | 48373                | 7.1  | 634478   | 92.9 | <0.001   | 44706         | 6.9  | 601593   | 93.1 | <0.001   | 3667       | 10.0 | 32885    | 90.0 | 0.523    |
| Female                        | 34338                | 6.2  | 522285   | 93.8 |          | 31646         | 6.0  | 497684   | 94.0 |          | 2692       | 9.9  | 24601    | 90.1 |          |
| Age group (years)             |                      |      |          |      |          |               |      |          |      |          |            |      |          |      |          |
| <18                           | 5123                 | 9.4  | 49354    | 90.6 | <0.001   | 3718          | 10.5 | 31846    | 89.5 | <0.001   | 1405       | 7.4  | 17508    | 92.6 | <0.001   |
| 18-40                         | 38471                | 5.2  | 697198   | 94.8 |          | 37955         | 5.2  | 689948   | 94.8 |          | 516        | 6.6  | 7250     | 93.4 |          |
| 41-64                         | 26380                | 7.9  | 307322   | 92.1 |          | 24659         | 7.8  | 291586   | 92.2 |          | 1721       | 9.9  | 15736    | 90.1 |          |
| 65+                           | 12737                | 11.0 | 102860   | 89.0 |          | 10020         | 10.4 | 85874    | 89.6 |          | 2717       | 13.8 | 16986    | 86.2 |          |
| Location                      |                      |      |          |      |          |               |      |          |      |          |            |      |          |      |          |
| Highly urbanized area         | 8815                 | 3.6  | 237868   | 96.4 | <0.001   | 8218          | 3.5  | 227548   | 96.5 | <0.001   | 597        | 5.5  | 10320    | 94.5 | <0.001   |
| Medium urbanized area         | 23379                | 5.5  | 401279   | 94.5 |          | 21743         | 5.4  | 383541   | 94.6 |          | 1636       | 8.4  | 17738    | 91.6 |          |
| Boomtown                      | 20149                | 7.0  | 268552   | 93.0 |          | 18709         | 6.8  | 255449   | 93.2 |          | 1440       | 9.9  | 13103    | 90.1 |          |
| General township              | 18924                | 9.8  | 174893   | 90.2 |          | 17251         | 9.5  | 163844   | 90.5 |          | 1673       | 13.2 | 11049    | 86.8 |          |
| Rural area                    | 11444                | 13.4 | 73818    | 86.6 |          | 10431         | 13.2 | 68556    | 86.8 |          | 1013       | 16.1 | 5262     | 83.9 |          |
| Motorcycle engine capacity    |                      |      |          |      |          |               |      |          |      |          |            |      |          |      |          |
| ≥51cc                         | 60411                | 6.2  | 907379   | 93.8 | <0.001   | 60411         | 6.2  | 907379   | 93.8 | <0.001   | NA         | NA   | NA       | NA   | NA       |
| ≤50cc                         | 15941                | 7.7  | 191898   | 92.3 |          | 15941         | 7.7  | 191898   | 92.3 |          | NA         | NA   | NA       | NA   |          |
| Drunk Driving                 |                      |      |          |      |          |               |      |          |      |          |            |      |          |      |          |
| No (BAC <sup>a</sup> ≤0.03%)  | 71070                | 6.0  | 1108293  | 94.0 | <0.001   | 64876         | 5.8  | 1051700  | 94.2 | <0.001   | 6194       | 9.9  | 56593    | 90.1 | <0.001   |
| Yes (BAC <sup>a</sup> >0.03%) | 11641                | 19.4 | 48470    | 80.6 |          | 11476         | 19.4 | 47577    | 80.6 |          | 165        | 15.6 | 893      | 84.4 |          |

1  
2  
3  
4  
5  
6  
7  
8  
9  
10  
11  
12  
13  
14  
15  
16  
17  
18  
19  
20  
21  
22  
23  
24  
25  
26  
27  
28  
29  
30  
31  
32  
33  
34  
35  
36  
37  
38  
39  
40  
41  
42  
43  
44  
45  
46  
47  
48  
49

|            |       |      |         |      |        |       |      |         |      |        |      |      |       |      |        |
|------------|-------|------|---------|------|--------|-------|------|---------|------|--------|------|------|-------|------|--------|
| Helmet use |       |      |         |      |        |       |      |         |      |        |      |      |       |      |        |
| Yes        | 63575 | 5.9  | 1011701 | 94.1 | <0.001 | 63158 | 5.9  | 1006568 | 94.1 | <0.001 | 417  | 7.5  | 5133  | 92.5 | <0.001 |
| No         | 19136 | 11.7 | 145062  | 88.3 |        | 13194 | 12.5 | 92709   | 87.5 |        | 5942 | 10.2 | 52353 | 89.8 |        |
| License    |       |      |         |      |        |       |      |         |      |        |      |      |       |      |        |
| Yes        | 57613 | 5.7  | 952109  | 94.3 | <0.001 | 57613 | 5.7  | 952109  | 94.3 | <0.001 | NA   | NA   | NA    | NA   | NA     |
| No         | 16028 | 11.0 | 129169  | 89.0 |        | 16028 | 11.0 | 129169  | 89.0 |        | NA   | NA   | NA    | NA   |        |

<sup>a</sup>BAC: Blood alcohol concentration

For peer review only

Table 3. Environment characteristics of inpatients with head injury involved in two-wheeled vehicle crashes

|                                        | Two-wheeled vehicles |      |          |      |          | Motorcyclists |      |          |      |          | Bicyclists |      |          |      |          |
|----------------------------------------|----------------------|------|----------|------|----------|---------------|------|----------|------|----------|------------|------|----------|------|----------|
|                                        | Cases                |      | Controls |      | <i>p</i> | Cases         |      | Controls |      | <i>p</i> | Cases      |      | Controls |      | <i>p</i> |
|                                        | n                    | %    | n        | %    |          | n             | %    | n        | %    |          | n          | %    | n        | %    |          |
| Path Type                              |                      |      |          |      |          |               |      |          |      |          |            |      |          |      |          |
| Straight road                          | 34581                | 7.9  | 404337   | 92.1 | <0.001   | 31629         | 7.7  | 379675   | 92.3 | <0.001   | 2952       | 10.7 | 24662    | 89.3 | <0.001   |
| Curved road                            | 4344                 | 9.1  | 43312    | 90.9 |          | 4031          | 9.0  | 40950    | 91.0 |          | 313        | 11.7 | 2362     | 88.3 |          |
| Crossroads/Roundabout                  | 43786                | 5.8  | 709114   | 94.2 |          | 40692         | 5.7  | 678652   | 94.3 |          | 3094       | 9.2  | 30462    | 90.8 |          |
| Lighting                               |                      |      |          |      |          |               |      |          |      |          |            |      |          |      |          |
| Daylight                               | 79618                | 6.6  | 1131762  | 93.4 | <0.001   | 73593         | 6.4  | 1076250  | 93.6 | <0.001   | 6025       | 9.8  | 55512    | 90.2 | <0.001   |
| Dusk or dawn                           | 3093                 | 11.0 | 25001    | 89.0 |          | 2759          | 10.7 | 23027    | 89.3 |          | 334        | 14.5 | 1974     | 85.5 |          |
| Road type                              |                      |      |          |      |          |               |      |          |      |          |            |      |          |      |          |
| Provincial Highway                     | 7368                 | 10.5 | 62628    | 89.5 | <0.001   | 6833          | 10.3 | 59461    | 89.7 | <0.001   | 535        | 14.5 | 3167     | 85.5 | <0.001   |
| County road                            | 8923                 | 9.6  | 84422    | 90.4 |          | 8185          | 9.3  | 80043    | 90.7 |          | 738        | 14.4 | 4379     | 85.6 |          |
| Others(Township road/<br>Private road) | 66404                | 6.2  | 1009614  | 93.8 |          | 61318         | 6.0  | 959677   | 94.0 |          | 5086       | 9.2  | 49937    | 90.8 |          |
| Road surface                           |                      |      |          |      |          |               |      |          |      |          |            |      |          |      |          |
| Dry                                    | 74774                | 6.8  | 1024947  | 93.2 | <0.001   | 69030         | 6.6  | 973197   | 93.4 | <0.001   | 5744       | 10.0 | 51750    | 90.0 | 0.482    |
| Wet/Slippery                           | 7937                 | 5.7  | 131816   | 94.3 |          | 7322          | 5.5  | 126080   | 94.5 |          | 615        | 9.7  | 5736     | 90.3 |          |
| Road defect                            |                      |      |          |      |          |               |      |          |      |          |            |      |          |      |          |
| No                                     | 81560                | 6.7  | 1144635  | 93.3 | <0.001   | 75251         | 6.5  | 1087538  | 93.5 | <0.001   | 6309       | 10.0 | 57097    | 90.0 | 0.367    |
| Yes                                    | 1151                 | 8.7  | 12128    | 91.3 |          | 1101          | 8.6  | 11739    | 91.4 |          | 50         | 11.4 | 389      | 88.6 |          |
| Barrier                                |                      |      |          |      |          |               |      |          |      |          |            |      |          |      |          |
| No                                     | 79862                | 6.7  | 1120926  | 93.3 | <0.001   | 73658         | 6.5  | 1065006  | 93.5 | <0.001   | 6204       | 10.0 | 55920    | 90.0 | 0.224    |
| Yes                                    | 2849                 | 7.4  | 35837    | 92.6 |          | 2694          | 7.3  | 34271    | 92.7 |          | 155        | 9.0  | 1566     | 91.0 |          |

1  
2  
3  
4  
5  
6  
7  
8  
9  
10  
11  
12  
13  
14  
15  
16  
17  
18  
19  
20  
21  
22  
23  
24  
25  
26  
27  
28  
29  
30  
31  
32  
33  
34  
35  
36  
37  
38  
39  
40  
41  
42  
43  
44  
45  
46  
47  
48  
49

|                                  |       |     |        |      |        |       |     |        |      |        |      |      |       |      |        |
|----------------------------------|-------|-----|--------|------|--------|-------|-----|--------|------|--------|------|------|-------|------|--------|
| Traffic signal                   |       |     |        |      |        |       |     |        |      |        |      |      |       |      |        |
| Yes                              | 25993 | 5.7 | 434048 | 94.3 | <0.001 | 24265 | 5.5 | 417304 | 94.5 | <0.001 | 1728 | 9.4  | 16744 | 90.6 | 0.003  |
| No                               | 56718 | 7.3 | 722715 | 92.7 |        | 52087 | 7.1 | 681973 | 92.9 |        | 4631 | 10.2 | 40742 | 89.8 |        |
| Separation of traffic directions |       |     |        |      |        |       |     |        |      |        |      |      |       |      |        |
| Yes                              | 48122 | 6.9 | 648417 | 93.1 | <0.001 | 44113 | 6.7 | 613461 | 93.3 | <0.001 | 4009 | 10.3 | 34956 | 89.7 | 0.002  |
| No                               | 34589 | 6.4 | 508346 | 93.6 |        | 32239 | 6.2 | 485816 | 93.8 |        | 2350 | 9.4  | 22530 | 90.6 |        |
| Traffic island                   |       |     |        |      |        |       |     |        |      |        |      |      |       |      |        |
| Yes                              | 25552 | 7.6 | 309424 | 92.4 | <0.001 | 23531 | 7.4 | 293206 | 92.6 | <0.001 | 2021 | 11.1 | 16218 | 88.9 | <0.001 |
| No                               | 57159 | 6.3 | 847339 | 93.7 |        | 52821 | 6.1 | 806071 | 93.9 |        | 4338 | 9.5  | 41268 | 90.5 |        |

Table 4. Crash characteristics of inpatients with head injury involved in two-wheeled vehicle crashes

|                            | Two-wheeled vehicles |      |          |      |          | Motorcyclists |      |          |      |          | Bicyclists |      |          |      |          |
|----------------------------|----------------------|------|----------|------|----------|---------------|------|----------|------|----------|------------|------|----------|------|----------|
|                            | Cases                |      | Controls |      | <i>p</i> | Cases         |      | Controls |      | <i>p</i> | Cases      |      | Controls |      | <i>p</i> |
|                            | n                    | %    | n        | %    |          | n             | %    | n        | %    |          | n          | %    | n        | %    |          |
| Crash type                 |                      |      |          |      |          |               |      |          |      |          |            |      |          |      |          |
| Multiple vehicle           | 66457                | 6.0  | 1047128  | 94.0 | <0.001   | 60466         | 5.7  | 991673   | 94.3 | <0.001   | 5991       | 9.8  | 5981.2   | 90.2 | <0.001   |
| Single vehicle             | 16245                | 12.9 | 109635   | 87.1 |          | 15877         | 12.9 | 107604   | 87.1 |          | 368        | 15.3 | 352.7    | 84.7 |          |
| Object type                |                      |      |          |      |          |               |      |          |      |          |            |      |          |      |          |
| Unfixed objects            | 10829                | 11.3 | 84984    | 88.7 | <0.001   | 10542         | 11.2 | 83360    | 88.8 | <0.001   | 287        | 15   | 272      | 85.0 | 0.461    |
| Fixed objects              | 5416                 | 18.0 | 24651    | 82.0 |          | 5335          | 18.0 | 24244    | 82.0 |          | 81         | 16.6 | 64.4     | 83.4 |          |
| Fixed objects              |                      |      |          |      |          |               |      |          |      |          |            |      |          |      |          |
| Buildings/Barriers         | 1574                 | 14.4 | 9381     | 85.6 | <0.001   | 1518          | 14.3 | 9072     | 85.7 | <0.001   | 56         | 15.3 | 40.7     | 84.7 | 0.282    |
| Traffic                    | 3842                 | 20.1 | 15270    | 79.9 |          | 3817          | 20.1 | 15172    | 79.9 |          | 25         | 20.3 | 4.7      | 79.7 |          |
| islands/Trees/Poles/Others |                      |      |          |      |          |               |      |          |      |          |            |      |          |      |          |
| Unfixed objects            |                      |      |          |      |          |               |      |          |      |          |            |      |          |      |          |
| Animals/Pedestrians        | 2242                 | 7.1  | 29369    | 92.9 | <0.001   | 2230          | 7.1  | 29134    | 92.9 | <0.001   | 12         | 4.9  | 7.1      | 95.1 | <0.001   |
| Skidding vehicle           | 8587                 | 13.4 | 55615    | 86.6 |          | 8312          | 13.3 | 54226    | 86.7 |          | 275        | 16.5 | 258.5    | 83.5 |          |

232

233 Table 5 lists the crude and adjusted odds ratios (ORs) of hospitalisation for head  
234 injuries among bicyclists and motorcyclists using logistic regression models. Three  
235 models were estimated: a pooled model that considered the variable “vehicle type” as  
236 a risk factor and two separate models for bicyclists and motorcyclists. According to  
237 the variance inflation factor being  $<3$ , there was no need to be concerned about  
238 multi-collinearity in the models.



Table 5. Crude and adjusted odds ratios of hospitalization for head injury in two-wheeled vehicle crashed accidents

|                            | Two-wheeled vehicles |             |             |             | Motorcyclists |             |             |             | Bicyclist   |             |             |             |
|----------------------------|----------------------|-------------|-------------|-------------|---------------|-------------|-------------|-------------|-------------|-------------|-------------|-------------|
|                            | Crude OR             | 95% CI      | Adjusted OR | 95% CI      | Crude OR      | 95% CI      | Adjusted OR | 95% CI      | Crude OR    | 95% CI      | Adjusted OR | 95% CI      |
| Vehicle type               |                      |             |             |             |               |             |             |             |             |             |             |             |
| Motorcycle                 | 1.00 (ref.)          |             | 1.00 (ref.) |             | ---           |             | ---         |             | ---         |             | ---         |             |
| Bicycle                    | 1.59*                | 1.55 - 1.64 | 0.82*       | 0.79 - 0.85 |               |             |             |             |             |             |             |             |
| Gender                     |                      |             |             |             |               |             |             |             |             |             |             |             |
| Male                       | 1.00 (ref.)          |             | 1.00 (ref.) |             | 1.00 (ref.)   |             | 1.00 (ref.) |             | 1.00 (ref.) |             | 1.00 (ref.) |             |
| Female                     | 0.86*                | 0.85 - 0.88 | 1.08*       | 1.07 - 1.10 | 0.86*         | 0.84 - 0.87 | 1.03*       | 1.02 - 1.05 | 0.98        | 0.93 - 1.03 | 1.01        | 0.95 - 1.06 |
| Age(year)                  |                      |             |             |             |               |             |             |             |             |             |             |             |
| <18                        | 0.57*                | 0.57 - 0.58 | 0.62*       | 0.60 - 0.64 | 0.59*         | 0.58 - 0.60 | 0.71*       | 0.68 - 0.74 | 0.61*       | 0.56 - 0.67 | 0.86*       | 0.77 - 0.96 |
| 18-40                      | 1.00 (ref.)          |             | 1.00 (ref.) |             | 1.00 (ref.)   |             | 1.00 (ref.) |             | 1.00 (ref.) |             | 1.00 (ref.) |             |
| 41-64                      | 1.29*                | 1.28 - 1.31 | 0.86*       | 0.83 - 0.89 | 1.32*         | 1.30 - 1.34 | 0.93*       | 0.89 - 0.97 | 0.98        | 0.93 - 1.04 | 1.40*       | 1.29 - 1.51 |
| 65+                        | 1.87*                | 1.83 - 1.90 | 1.23*       | 1.19 - 1.28 | 1.78*         | 1.74 - 1.82 | 1.23*       | 1.18 - 1.29 | 1.78*       | 1.69 - 1.88 | 1.92*       | 1.80 - 2.06 |
| Location                   |                      |             |             |             |               |             |             |             |             |             |             |             |
| Highly urbanized area      | 1.00 (ref.)          |             | 1.00 (ref.) |             | 1.00 (ref.)   |             | 1.00 (ref.) |             | 1.00 (ref.) |             | 1.00 (ref.) |             |
| Medium urbanized area      | 0.74*                | 0.73 - 0.75 | 1.49*       | 1.45 - 1.53 | 0.74*         | 0.73 - 0.76 | 1.51*       | 1.47 - 1.55 | 0.78*       | 0.73 - 0.82 | 1.60*       | 1.45 - 1.76 |
| Boomtown                   | 1.07*                | 1.05 - 1.08 | 1.78*       | 1.73 - 1.83 | 1.07*         | 1.05 - 1.09 | 1.81*       | 1.76 - 1.86 | 0.99        | 0.93 - 1.06 | 1.89*       | 1.70 - 2.09 |
| General township           | 1.67*                | 1.64 - 1.70 | 2.31*       | 2.25 - 2.38 | 1.67*         | 1.64 - 1.70 | 2.37*       | 2.30 - 2.44 | 1.50*       | 1.41 - 1.59 | 2.42*       | 2.18 - 2.68 |
| Rural area                 | 2.36*                | 2.31 - 2.41 | 2.74*       | 2.66 - 2.83 | 2.38*         | 2.33 - 2.43 | 2.77*       | 2.68 - 2.87 | 1.88*       | 1.75 - 2.02 | 2.94*       | 2.63 - 3.29 |
| Motorcycle engine capacity |                      |             |             |             |               |             |             |             |             |             |             |             |
| ≥51cc                      | ---                  |             | ---         |             | 1.00 (ref.)   |             | 1.00 (ref.) |             | ---         |             | ---         |             |
| ≤50cc                      |                      |             |             |             | 1.25*         | 1.23 - 1.27 | 1.18*       | 1.15 - 1.20 |             |             |             |             |

|                                     | Two-wheeled vehicles |             |             |             | Motorcyclists |             |             |             | Bicyclist   |             |             |             |
|-------------------------------------|----------------------|-------------|-------------|-------------|---------------|-------------|-------------|-------------|-------------|-------------|-------------|-------------|
|                                     | Crude OR             | 95% CI      | Adjusted OR | 95% CI      | Crude OR      | 95% CI      | Adjusted OR | 95% CI      | Crude OR    | 95% CI      | Adjusted OR | 95% CI      |
| Drunk driving                       |                      |             |             |             |               |             |             |             |             |             |             |             |
| No (BAC <sup>a</sup> ≤0.03%)        | 1.00 (ref.)          |             | 1.00 (ref.) |             | 1.00 (ref.)   |             | 1.00 (ref.) |             | 1.00 (ref.) |             | 1.00 (ref.) |             |
| Yes (BAC <sup>a</sup> >0.03%)       | 3.75*                | 3.67 - 3.83 | 2.80*       | 2.73 - 2.87 | 3.91*         | 3.83 - 4.00 | 2.64*       | 2.58 - 2.71 | 1.69*       | 1.43 - 2.00 | 1.47*       | 1.23 - 1.75 |
| Helmet use                          |                      |             |             |             |               |             |             |             |             |             |             |             |
| Yes                                 | 1.00 (ref.)          |             | 1.00 (ref.) |             | 1.00 (ref.)   |             | 1.00 (ref.) |             | 1.00 (ref.) |             | 1.00 (ref.) |             |
| No                                  | 2.10*                | 2.06 - 2.14 | 1.77*       | 1.74 - 1.81 | 2.27*         | 2.22 - 2.31 | 1.73*       | 1.69 - 1.77 | 1.40*       | 1.26 - 1.55 | 1.24*       | 1.12 - 1.38 |
| License                             |                      |             |             |             |               |             |             |             |             |             |             |             |
| Yes                                 | ---                  |             | ---         |             | 1.00 (ref.)   |             | 1.00 (ref.) |             | ---         |             | ---         |             |
| No                                  |                      |             |             |             | 2.05*         | 2.01 - 2.09 | 1.36*       | 1.33 - 1.39 |             |             |             |             |
| Path type                           |                      |             |             |             |               |             |             |             |             |             |             |             |
| Straight road                       | 1.00 (ref.)          |             | 1.00 (ref.) |             | 1.00 (ref.)   |             | 1.00 (ref.) |             | 1.00 (ref.) |             | 1.00 (ref.) |             |
| Curved road                         | 1.43*                | 1.38 - 1.47 | 1.01        | 0.98 - 1.05 | 1.44*         | 1.39 - 1.49 | 1.00        | 0.96 - 1.03 | 1.21*       | 1.07 - 1.36 | 1.16*       | 1.03 - 1.32 |
| Crossroads/Roundabout               | 0.71*                | 0.70 - 0.72 | 0.90*       | 0.88 - 0.92 | 0.71*         | 0.70 - 0.72 | 0.90*       | 0.88 - 0.92 | 0.84*       | 0.80 - 0.89 | 0.94        | 0.87 - 1.00 |
| Lighting                            |                      |             |             |             |               |             |             |             |             |             |             |             |
| Daylight                            | 1.00 (ref.)          |             | 1.00 (ref.) |             | 1.00 (ref.)   |             | 1.00 (ref.) |             | 1.00 (ref.) |             | 1.00 (ref.) |             |
| Dusk or dawn                        | 1.76*                | 1.69 - 1.83 | 1.08*       | 1.03 - 1.12 | 1.75*         | 1.68 - 1.82 | 1.05*       | 1.00 - 1.09 | 1.56*       | 1.38 - 1.76 | 1.28*       | 1.13 - 1.45 |
| Road type                           |                      |             |             |             |               |             |             |             |             |             |             |             |
| Provincial highway                  | 1.00 (ref.)          |             | 1.00 (ref.) |             | 1.00 (ref.)   |             | 1.00 (ref.) |             | 1.00 (ref.) |             | 1.00 (ref.) |             |
| County road                         | 1.54*                | 1.50 - 1.57 | 0.98        | 0.94 - 1.01 | 1.53*         | 1.49 - 1.57 | 0.97        | 0.93 - 1.00 | 1.59*       | 1.47 - 1.73 | 1.06        | 0.94 - 1.20 |
| Others (Township road/Private road) | 0.59*                | 0.58 - 0.60 | 0.83*       | 0.81 - 0.85 | 0.59*         | 0.58 - 0.61 | 0.82*       | 0.80 - 0.85 | 0.60*       | 0.57 - 0.65 | 0.85*       | 0.77 - 0.94 |
| Road surface                        |                      |             |             |             |               |             |             |             |             |             |             |             |

|                                  | Two-wheeled vehicles |             |             |             | Motorcyclists |             |             |             | Bicyclist   |             |             |             |
|----------------------------------|----------------------|-------------|-------------|-------------|---------------|-------------|-------------|-------------|-------------|-------------|-------------|-------------|
|                                  | Crude OR             | 95% CI      | Adjusted OR | 95% CI      | Crude OR      | 95% CI      | Adjusted OR | 95% CI      | Crude OR    | 95% CI      | Adjusted OR | 95% CI      |
| Dry                              | 1.00 (ref.)          |             | 1.00 (ref.) |             | 1.00 (ref.)   |             | 1.00 (ref.) |             | 1.00 (ref.) |             | 1.00 (ref.) |             |
| Wet/Slippery                     | 0.83*                | 0.81 - 0.85 | 0.85*       | 0.83 - 0.87 | 0.82*         | 0.80 - 0.84 | 0.84*       | 0.81 - 0.86 | 0.97        | 0.89 - 1.06 | 1.01        | 0.93 - 1.11 |
| Road defect                      |                      |             |             |             |               |             |             |             |             |             |             |             |
| No                               | 1.00 (ref.)          |             | 1.00 (ref.) |             | 1.00 (ref.)   |             | 1.00 (ref.) |             | 1.00 (ref.) |             | 1.00 (ref.) |             |
| Yes                              | 1.33*                | 1.25 - 1.42 | 0.95        | 0.89 - 1.01 | 1.36*         | 1.28 - 1.44 | 0.96        | 0.90 - 1.03 | 1.16        | 0.87 - 1.56 | 1.00        | 0.74 - 1.36 |
| Barrier                          |                      |             |             |             |               |             |             |             |             |             |             |             |
| No                               | 1.00 (ref.)          |             | 1.00 (ref.) |             | 1.00 (ref.)   |             | 1.00 (ref.) |             | 1.00 (ref.) |             | 1.00 (ref.) |             |
| Yes                              | 1.12*                | 1.07 - 1.16 | 0.99        | 0.95 - 1.03 | 1.14*         | 1.09 - 1.18 | 0.99        | 0.95 - 1.03 | 0.89        | 0.76 - 1.05 | 0.92        | 0.78 - 1.09 |
| Traffic signal                   |                      |             |             |             |               |             |             |             |             |             |             |             |
| Yes                              | 1.00 (ref.)          |             | 1.00 (ref.) |             | 1.00 (ref.)   |             | 1.00 (ref.) |             | 1.00 (ref.) |             | 1.00 (ref.) |             |
| No                               | 1.31*                | 1.29 - 1.33 | 1.02        | 1.00 - 1.04 | 1.31*         | 1.29 - 1.33 | 1.03*       | 1.01 - 1.05 | 1.10*       | 1.04 - 1.17 | 0.93        | 0.87 - 1.00 |
| Separation of traffic directions |                      |             |             |             |               |             |             |             |             |             |             |             |
| Yes                              | 1.00 (ref.)          |             | 1.00 (ref.) |             | 1.00 (ref.)   |             | 1.00 (ref.) |             | 1.00 (ref.) |             | 1.00 (ref.) |             |
| No                               | 0.92*                | 0.90 - 0.93 | 1.21*       | 1.19 - 1.24 | 0.92*         | 0.91 - 0.94 | 1.21*       | 1.19 - 1.23 | 0.91*       | 0.86 - 0.96 | 1.09*       | 1.02 - 1.16 |
| Traffic island                   |                      |             |             |             |               |             |             |             |             |             |             |             |
| Yes                              | 1.00 (ref.)          |             | 1.00 (ref.) |             | 1.00 (ref.)   |             | 1.00 (ref.) |             | 1.00 (ref.) |             | 1.00 (ref.) |             |
| No                               | 0.82*                | 0.80 - 0.83 | 0.74*       | 0.73 - 0.76 | 0.82*         | 0.80 - 0.83 | 0.74*       | 0.73 - 0.76 | 0.84*       | 0.80 - 0.89 | 0.80*       | 0.75 - 0.86 |
| Crash type                       |                      |             |             |             |               |             |             |             |             |             |             |             |
| Multiple vehicle                 | 1.00 (ref.)          |             | 1.00 (ref.) |             | 1.00 (ref.)   |             | 1.00 (ref.) |             | 1.00 (ref.) |             | 1.00 (ref.) |             |
| Single vehicle                   | 2.34*                | 2.29 - 2.38 | 1.75*       | 1.71 - 1.79 | 2.42*         | 2.38 - 2.47 | 1.76*       | 1.72 - 1.79 | 1.68*       | 1.50 - 1.88 | 1.56*       | 1.38 - 1.76 |

<sup>a</sup>BAC: Blood alcohol concentration

239

240 The pooled model revealed that bicyclists were 18% significantly less likely to be  
241 hospitalised for head injuries than motorcyclists were (AOR=0.82; CI=0.79-0.85). Moreover,  
242 factors such as the females (AOR=1.08, CI=1.07-1.10), age 65 or above (AOR=1.23,  
243 CI=1.19-1.28), rural areas ((AOR=2.74, CI=2.66-2.83), BAC level>0.03% (AOR=2.80,  
244 CI=2.73-2.87), no use of a helmet (AOR=1.77, CI=1.74-1.81), darkness (AOR=1.08,  
245 CI=1.03-1.12), no separator of divided traffic direction (AOR=1.21, CI=1.19-1.24), and  
246 single-vehicle crash(AOR=1.75, CI=1.71-1.79) were found to be the most significantly  
247 associated with hospitalisation for head injuries.

248 The estimated crude and adjusted ORs (AORs) of the two separate models evaluating  
249 factors contributing to the hospitalisation of bicyclists and motorcyclists for head injuries  
250 were similar to those of the pooled model. Noteworthy results include that female  
251 motorcyclists (AOR=1.03) and elderly bicyclists and motorcyclists (AORs=1.92 and 1.23,  
252 respectively) were more likely to be hospitalised for head injuries. Accidents that occurred in  
253 rural areas were associated with a higher risk of hospitalisation for head injuries among  
254 bicyclists and motorcyclists (AORs=2.94 and 2.77, respectively). The odds of hospitalisation  
255 were higher in riders of mopeds who sustained head injuries than in heavy-motorcycles riders  
256 (AOR=1.18). Intoxicated bicyclists and motorcyclists had a higher risk of hospitalisation for  
257 head injuries (AORs=2.64 and 1.48, respectively). Riding without helmets was found to be a

1  
2  
3  
4 258 risk factor in both bicyclists and motorcyclists (AORs=1.24 and 1.73, respectively).  
5  
6

7 259 Motorcyclists travelling without a legal licence were more prone to be hospitalised for head  
8

9  
10 260 injuries (AOR=1.36). Furthermore, curved roadways and dusk or dawn were associated with  
11

12 261 an increased risks of hospitalisation for head injuries among bicyclists (AORs=1.16 and 1.28,  
13

14  
15 262 respectively).  
16  
17

18 263 The risk of hospitalisation for head injuries was higher among bicyclists and  
19

20 264 motorcyclists involved in MVCs that occurred on roadways without separation of traffic  
21

22 265 direction (AORs=1.09 and 1.21, respectively). Moreover, the risk of hospitalisation for head  
23

24 266 injuries was 56% and 76% (AORs=1.56 and 1.76, respectively) higher in bicyclists and  
25

26 267 motorcyclists involved in single-vehicle crashes than in those involved in multi-vehicle  
27

28  
29 268 crashes.  
30  
31

32  
33 269  
34  
35

## 36 270 **Discussions**

37  
38

39  
40 271  
41  
42

43  
44 272 To ascertain the research hypotheses, the univariate results suggest that compared with  
45

46 273 motorcyclists, bicyclists sustaining head injuries were 59% more likely to be hospitalised.  
47

48  
49 274 However, the results of multivariate logistic models revealed that compared with  
50

51 275 motorcyclists, bicyclists who sustained head injuries had an 18% decreased probability of  
52

53 276 being hospitalised. After the adjustment of this result for other factors, helmet use appeared to  
54  
55  
56  
57  
58  
59  
60

1  
2  
3  
4 277 be beneficial in reducing the risks of hospitalisation for head injuries among bicyclists.  
5  
6

7 278 The National Traffic Accident Dataset and the NHIRD are both national datasets that  
8  
9  
10 279 cover 99.9% of populations. This is a comprehensive study using the linked data from these  
11  
12 280 two datasets which facilitate the determination of various factors associated with an increased  
13  
14  
15 281 risk of hospitalisation for head injuries among bicyclists and motorcyclists in Taiwan. The  
16  
17  
18 282 conclusions drawn from the current research can therefore be more reliable than other studies  
19  
20  
21 283 that solely used a single dataset.  
22  
23

24 284 Our finding underscores the importance of helmet use in reducing hospitalisation due to  
25  
26  
27 285 head injuries among bicyclists while current helmet use is relatively low. Also, additional  
28  
29  
30 286 interventions such as education and campaigns should aim to increase riders' awareness of  
31  
32  
33 287 other factors that were found to influence head-injury related hospitalisations. Together with  
34  
35  
36 288 helmet law, these additional interventions can further reduce head-injury related  
37  
38  
39 289 hospitalisation not only for bicyclists but also for motorcyclists.  
40

41 290 The current research is limited by the fact that death data are not explicitly recorded in the  
42  
43  
44 291 NHIRD. Patients would die even if they are hospitalised. Unfortunately no such data is  
45  
46  
47 292 available from the NHIRD – these patients are recorded as “hospitalisation” instead of  
48  
49  
50 293 “deaths”. Future research may attempt to obtain death data that are unavailable from the  
51  
52  
53 294 NHIRD, which would open up additional analysis possibilities and allow more precise model  
54  
55  
56 295 estimation.  
57  
58  
59  
60

1  
2  
3  
4 296 Compared with motorcyclists, bicyclists sustaining head injuries were found to have  
5  
6  
7 297 higher risks of hospitalisation; however, after the adjustment of this result for other factors in  
8  
9  
10 298 the multivariate analysis, bicyclists have lower risks of hospitalisation. The results here have  
11  
12 299 important implications for policymakers. In 2016, bicycle helmet use became compulsory for  
13  
14 300 electric bicycle users but not for traditional bicycle users in Taiwan. A large-scale nationwide  
15  
16 301 travel survey<sup>24</sup> reported that helmet use was relatively lower among bicyclists (6.8%) than  
17  
18 302 among motorcyclists (82.2%). Because the use of electric bicycles (with higher velocities that  
19  
20 303 may exacerbate crash impacts and injury outcomes) and racing bikes (which have been widely  
21  
22 304 used for recreational purpose and travelling between cities) has been increasing in recent  
23  
24 305 years, the government should consider encouraging helmets for all bicycles. Further research  
25  
26 306 can therefore be conducted once bicycle helmet use becomes more popular.

27  
28  
29  
30  
31  
32  
33  
34  
35 307 In this study, two additional logistic models for bicyclists and motorcyclists were  
36  
37 308 estimated. The results revealed that contributory factors to hospitalisation for head injuries are  
38  
39 309 similar among bicyclists and motorcyclists. For instance, dusk or dawn was associated with a  
40  
41 310 higher risk of hospitalisation for head injuries among bicyclists and motorcyclists. The result  
42  
43 311 here adds to existing literature of motorcycle and bicycle road safety by concluding that  
44  
45 312 diminished light conditions are associated not only with accident occurrence<sup>25 26</sup> but also with  
46  
47 313 head injury-related hospitalisation. It seems clear here that enhancing conspicuity, in  
48  
49 314 particular in diminished light conditions, may be an effective countermeasure to reduce both  
50  
51  
52  
53  
54  
55  
56  
57  
58  
59  
60

1  
2  
3  
4 315 accident risk and its consequences.  
5  
6

7 316 Our regression models revealed that the risk of hospitalisation is higher among elderly  
8  
9  
10 317 bicyclists and motorcyclists who sustained head injuries. Such a finding is in agreement with  
11  
12 318 that of Ekman et al. (2001)<sup>27</sup>, who reported that the risk of head injuries is higher among  
13  
14  
15 319 elderly bicyclists than their younger counterparts. This may be attributable to the fact that  
16  
17  
18 320 compared with young people, elderly people tend to have more chronic diseases and can have  
19  
20  
21 321 more complications after head injuries, and the hospitalisation rates of elderly people can be  
22  
23  
24 322 higher after an accident<sup>28 29</sup>.  
25  
26

27 323 The risk of head injury-related hospitalisation was higher among bicyclists and  
28  
29  
30 324 motorcyclists involved in single-vehicle crashes. This finding may be attributable to higher  
31  
32  
33 325 crash velocities being common in single-vehicle crashes<sup>30</sup>, and helmet use being less common  
34  
35  
36 326 in rural areas where single-vehicle crashes usually occur<sup>31</sup>. Speed management schemes that  
37  
38  
39 327 target all motorised vehicles in general and motorcycles and bicycles (e.g., electric bicycles  
40  
41  
42 328 that now in general may travel at more than 25 km/h<sup>32</sup>) in particular may constitute effective  
43  
44  
45 329 countermeasures for reducing hospitalisation rates for head injuries.  
46

47 330 Head injury-related hospitalisation was found to be associated with accidents that  
48  
49  
50 331 occurred in rural areas. This may be because of increasing kinetic energy and greater impact  
51  
52  
53 332 at higher speeds in rural settings<sup>33 34</sup>. In addition, heads are more likely to be exposed without  
54  
55  
56 333 any protection as a result of helmets being less commonly used in rural areas. Such a  
57  
58  
59  
60



1  
2  
3  
4 334 conjecture is supported by the findings of past studies<sup>35</sup> on motorcycle helmet use that  
5  
6  
7 335 concluded that compared with riders in cities, riders in rural areas were 7 times less likely to  
8  
9  
10 336 wear helmets. In addition, a national survey administrated by the HPA<sup>24</sup> reported that the  
11  
12 337 bicycle helmet use rate in urbanised areas was 1.5 times higher than that in rural areas.  
13  
14  
15 338 Moreover, the requirement of additional time for emergency-vehicle response in rural areas  
16  
17  
18 339 and the lower availability of medical resources in such areas<sup>36</sup> predispose people with head  
19  
20  
21 340 injuries to hospitalisation.

22  
23  
24 341 The study results revealed that the risk of hospitalisation was higher in both bicyclists and  
25  
26  
27 342 motorcyclists who sustained injuries in MVCs on roadways where traffic directions were not  
28  
29  
30 343 separated. This may be because of higher crash velocities at such locations. The road sections  
31  
32  
33 344 may be wide, and speed limits may be higher for locations where the traffic is not divided by  
34  
35  
36 345 any traffic barrier. Therefore, head injuries resulting from accidents in these locations may  
37  
38  
39 346 require hospitalisation. The population-based study was conducted in Taiwan where  
40  
41  
42 347 motorcycles are the dominated transportation mode and there has been a rapid increase in  
43  
44  
45 348 cycling including bikeshare bicycles. The results derived in the current research, therefore, are  
46  
47  
48 349 most generalizable to other countries where there is similar traffic composition.

49  
50 350 Unanswered questions remained in the current research include what other factors may  
51  
52  
53 351 affect hospitalisation due to head injuries among bicyclists and motorcyclists. Future research  
54  
55  
56 352 may attempt to obtain these variables that are not available from the National Traffic Accident  
57  
58  
59  
60

1  
2  
3  
4 353 Dataset and the NHIRD. These factors include motorcycle and bicycle types (a greater  
5  
6  
7 354 classification of engine size and electric bicycles), traffic volume, geometric characteristics,  
8  
9  
10 355 and electronic device use (e.g., phone and MP3 players) that have been increasingly used  
11  
12 356 when riding.

13  
14  
15 357

16  
17  
18 358

19  
20  
21 359 **Acknowledgements:**

22  
23  
24 360 Pai CW contributes to data analysis, interpretation of the data, and final approval of the  
25  
26  
27 361 version to be published.

28  
29  
30 362 Chen YC contributes to data analysis, and final approval of the version to be published.

31  
32  
33 363 Lin HY contributes to the design of the work, data analysis, interpretation of the data, drafting  
34  
35  
36 364 the manuscript and final approval of the version to be published.

37  
38  
39 365 Chen PL contributes to the design of the work, data analysis, interpretation of the data,  
40  
41  
42 366 drafting the manuscript and final approval of the version to be published.

43  
44  
45 367 The authors declare to have no conflict of interests.

46  
47  
48 368 This study was supported by a grant from the Health Promotion Administration, Ministry of  
49  
50  
51 369 Health and Welfare, Executive Yuan, Taiwan (Grant number: E1030909-104).

52  
53  
54 370 The data sources used in the present study were the National Traffic Accident Dataset and the  
55  
56  
57 371 National Health Insurance Research Database (NHIRD) from the Health and Welfare Data

1  
2  
3  
4 372 Science Center, Ministry of Health and Welfare, Taiwan.  
5  
6  
7 373 The National Traffic Accident Dataset and the National Health Insurance Research Database  
8  
9  
10 374 (NHIRD), which are open to the researchers in Taiwan, are available from the Health and  
11  
12 375 Welfare Data Science Center (<http://dep.mohw.gov.tw/DOS/np-2497-113.html>). Only citizens  
13  
14  
15 376 of Taiwan who fulfil the requirements of conducting research projects are eligible to apply for  
16  
17  
18 377 the NHIRD and National Traffic Accident Dataset. The use of NHIRD and National Traffic  
19  
20  
21 378 Accident Dataset are limited to research purposes only. Applicants must follow the  
22  
23  
24 379 Computer-Processed Personal Data Protection Law.  
25  
26  
27  
28  
29  
30  
31  
32  
33  
34  
35  
36  
37  
38  
39  
40  
41  
42  
43  
44  
45  
46  
47  
48  
49  
50  
51  
52  
53  
54  
55  
56  
57  
58  
59  
60

380 **Reference**

381

- 382 1. Depreitere B, Van Lierde C, Maene S, et al. Bicycle-related head injury: a study of 86 cases.  
383 *Accident Analysis & Prevention* 2004;36(4):561-67.
- 384 2. Mayrose J. The effects of a mandatory motorcycle helmet law on helmet use and injury  
385 patterns among motorcyclist fatalities. *Journal of Safety Research* 2008;39(4):429-32.
- 386 3. Peng Y, Vaidya N, Finnie R, et al. Universal motorcycle helmet laws to reduce injuries: A  
387 community guide systematic review. *American Journal of Preventive Medicine*  
388 2017;52(6):820-832.
- 389 4. Chen PL. Statistics for injury surveillance: Health Promotion Administration, Ministry of  
390 Health and Welfare, 2015.
- 391 5. Ministry of Transportation and Communications. Traffic statistics of year 2014. In:  
392 Ministry of Transportation and Communications T, Republic of China., ed., 2015.
- 393 6. Chiu W-T, Chu S-F, Chang C-K, et al. Implementation of a motorcycle helmet law in  
394 Taiwan and traffic deaths over 18 years. *JAMA* 2011;306(3):267-68.
- 395 7. Ichikawa M, Chadbunchachai W, Marui E. Effect of the helmet act for motorcyclists in  
396 Thailand. *Accident Analysis & Prevention* 2003;35(2):183-89.
- 397 8. Supramaniam V, van Belle G, Sung JF. Fatal motorcycle accidents and helmet laws in  
398 peninsular Malaysia. *Accident Analysis & Prevention* 1984;16(3):157-62.
- 399 9. Passmore J, Tu NTH, Luong MA, et al. Impact of mandatory motorcycle helmet wearing  
400 legislation on head injuries in Viet Nam: results of a preliminary analysis. *Traffic*  
401 *injury prevention* 2010;11(2):202-06.
- 402 10. Servadei F, Begliomini C, Gardini E, et al. Effect of Italy's motorcycle helmet law on  
403 traumatic brain injuries. *Injury prevention* 2003;9(3):257-60.
- 404 11. Amoros E, Chiron M, Martin J-L, et al. Bicycle helmet wearing and the risk of head, face,  
405 and neck injury: a French case-control study based on a road trauma registry. *Injury*  
406 *Prevention* 2011:ip. 2011.031815.
- 407 12. Attewell RG, Glase K, McFadden M. Bicycle helmet efficacy: a meta-analysis. *Accident*  
408 *Analysis & Prevention* 2001;33(3):345-52.
- 409 13. Clarke CF. Evaluation of New Zealand's bicycle helmet law. *The New Zealand Medical*  
410 *Journal (Online)* 2012;125(1349)
- 411 14. Macpherson A, Spinks A. Bicycle helmet legislation for the uptake of helmet use and  
412 prevention of head injuries (Review). *Cochrane Database of Systematic Reviews*  
413 2007;2
- 414 15. Dennis J, Potter B, Ramsay T, et al. The effects of provincial bicycle helmet legislation on  
415 helmet use and bicycle ridership in Canada. *Injury Prevention* 2010;16(4):219-24.
- 416 16. Walter SR, Olivier J, Churches T, et al. The impact of compulsory cycle helmet legislation

- 1  
2  
3 417 on cyclist head injuries in New South Wales, Australia. *Accident Analysis &*  
4 418 *Prevention* 2011;43(6):2064-71.
- 5  
6 419 17. Bambach MR, Mitchell R, Grzebieta RH, et al. The effectiveness of helmets in bicycle  
7 420 collisions with motor vehicles: A case-control study. *Accident Analysis & Prevention*  
8 421 2013;53:78-88.
- 9  
10 422 18. Olofsson E, Bunketorp O, Andersson A-L. Helmet use and injuries in children's bicycle  
11 423 crashes in the Gothenburg region. *Safety Science* 2017;92:311-17.
- 12  
13 424 19. Bonander C, Nilson F, Andersson R. The effect of the Swedish bicycle helmet law for  
14 425 children: an interrupted time series study. *Journal of safety research* 2014;51:15-22.
- 15  
16 426 20. Povey LJ, Frith W, Graham P. Cycle helmet effectiveness in New Zealand. *Accident*  
17 427 *Analysis & Prevention* 1999;31(6):763-70.
- 18  
19 428 21. Scuffham P, Alsop J, Cryer C, et al. Head injuries to bicyclists and the New Zealand  
20 429 bicycle helmet law. *Accident Analysis & Prevention* 2000;32(4):565-73.
- 21  
22 430 22. Chen PL, Jou RC, Saleh W, et al. Accidents involving pedestrians with their backs to  
23 431 traffic or facing traffic: an evaluation of crash characteristics and injuries. *Journal of*  
24 432 *Advanced Transportation* 2016;50(5):736-51.
- 25  
26 433 23. Sun Y, Chang Y-H, Chen H-F, et al. Risk of Parkinson disease onset in patients with  
27 434 diabetes. *Diabetes care* 2012;35(5):1047-49.
- 28  
29 435 24. Administration) HHP. Nation Health Interview Survey 2013. In: Health Promotion  
30 436 Administration MoHaW, ed., 2013.
- 31  
32 437 25. Pai C-W. Motorcycle right-of-way accidents—A literature review. *Accident Analysis &*  
33 438 *Prevention* 2011;43(3):971-82.
- 34  
35 439 26. Wood JM, Tyrrell RA, Marszalek R, et al. Bicyclists overestimate their own night-time  
36 440 conspicuity and underestimate the benefits of retroreflective markers on the moveable  
37 441 joints. *Accident Analysis & Prevention* 2013;55:48-53.
- 38  
39 442 27. Ekman R, Welander G, Svanström L, et al. Bicycle-related injuries among the elderly—a  
40 443 new epidemic? *Public Health* 2001;115(1):38-43.
- 41  
42 444 28. Cook LJ, Knight S, Olson LM, et al. Motor vehicle crash characteristics and medical  
43 445 outcomes among older drivers in Utah, 1992-1995. *Annals of emergency medicine*  
44 446 2000;35(6):585-91.
- 45  
46 447 29. Rakotonirainy A, Steinhardt D, Delhomme P, et al. Older drivers' crashes in Queensland,  
47 448 Australia. *Accident Analysis & Prevention* 2012;48:423-29.
- 48  
49 449 30. Clabaux N, Brenac T, Perrin C, et al. Motorcyclists' speed and "looked-but-failed-to-see"  
50 450 accidents. *Accident Analysis & Prevention* 2012;49:73-77.
- 51  
52 451 31. Russo BJ, Barrette TP, Morden J, et al. Examination of factors associated with use rates  
53 452 after transition from a universal to partial motorcycle helmet use law. *Traffic Injury*  
54 453 *Prevention* 2017;18(1):95-101.
- 55  
56 454 32. Langford BC, Chen J, Cherry CR. Risky riding: Naturalistic methods comparing safety  
57 455 behavior from conventional bicycle riders and electric bike riders. *Accident Analysis*

1  
2  
3  
4  
5  
6  
7  
8  
9  
10  
11  
12  
13  
14  
15  
16  
17  
18  
19  
20  
21  
22  
23  
24  
25  
26  
27  
28  
29  
30  
31  
32  
33  
34  
35  
36  
37  
38  
39  
40  
41  
42  
43  
44  
45  
46  
47  
48  
49  
50  
51  
52  
53  
54  
55  
56  
57  
58  
59  
60

456                    & *Prevention* 2015;82:220-26.

457

458 33. Pai C-W, Saleh W. Exploring motorcyclist injury severity in approach-turn collisions at  
459 T-junctions: Focusing on the effects of driver's failure to yield and junction control  
460 measures. *Accident Analysis & Prevention* 2008;40(2):479-86.

461 34. Broughton J. Car occupant and motorcyclist deaths, 1994-20022005.

462 35. Akaateba MA, Amoh-Gyimah R, Yakubu I. A cross-sectional observational study of  
463 helmet use among motorcyclists in Wa, Ghana. *Accident Analysis & Prevention*  
464 2014;64:18-22.

465 36. Noland R, Quddus M. Analysis of pedestrian and bicycle casualties with regional panel  
466 data. *Transportation Research Record: Journal of the Transportation Research Board*  
467 2004(1897):28-33.

468

peer review only



Appendix 1. Study flow diagram



Appendix 2. Trend of head injuries among two-wheeler riders involved in all emergency and inpatient visits for two-wheeler traffic accidents.

<sup>a</sup> :significantly decreasing according to the Mann-Kendall trend test



## STROBE Statement—checklist of items that should be included in reports of observational studies

|                           | Item No | Recommendation                                                                                                                                                                                                                                                                                                                                                                                                                                                         | Page  |
|---------------------------|---------|------------------------------------------------------------------------------------------------------------------------------------------------------------------------------------------------------------------------------------------------------------------------------------------------------------------------------------------------------------------------------------------------------------------------------------------------------------------------|-------|
| <b>Title and abstract</b> | 1       | (a) Indicate the study's design with a commonly used term in the title or the abstract                                                                                                                                                                                                                                                                                                                                                                                 | 1     |
|                           |         | (b) Provide in the abstract an informative and balanced summary of what was done and what was found                                                                                                                                                                                                                                                                                                                                                                    | 2-3   |
| <b>Introduction</b>       |         |                                                                                                                                                                                                                                                                                                                                                                                                                                                                        |       |
| Background/rationale      | 2       | Explain the scientific background and rationale for the investigation being reported                                                                                                                                                                                                                                                                                                                                                                                   | 5-7   |
| Objectives                | 3       | State specific objectives, including any prespecified hypotheses                                                                                                                                                                                                                                                                                                                                                                                                       | 7     |
| <b>Methods</b>            |         |                                                                                                                                                                                                                                                                                                                                                                                                                                                                        |       |
| Study design              | 4       | Present key elements of study design early in the paper                                                                                                                                                                                                                                                                                                                                                                                                                | 8     |
| Setting                   | 5       | Describe the setting, locations, and relevant dates, including periods of recruitment, exposure, follow-up, and data collection                                                                                                                                                                                                                                                                                                                                        | 8-10  |
| Participants              | 6       | (a) <i>Cohort study</i> —Give the eligibility criteria, and the sources and methods of selection of participants. Describe methods of follow-up<br><i>Case-control study</i> —Give the eligibility criteria, and the sources and methods of case ascertainment and control selection. Give the rationale for the choice of cases and controls<br><i>Cross-sectional study</i> —Give the eligibility criteria, and the sources and methods of selection of participants | 9-10  |
|                           |         | (b) <i>Cohort study</i> —For matched studies, give matching criteria and number of exposed and unexposed<br><i>Case-control study</i> —For matched studies, give matching criteria and the number of controls per case                                                                                                                                                                                                                                                 | N/A   |
| Variables                 | 7       | Clearly define all outcomes, exposures, predictors, potential confounders, and effect modifiers. Give diagnostic criteria, if applicable                                                                                                                                                                                                                                                                                                                               | 10-11 |
| Data sources/measurement  | 8*      | For each variable of interest, give sources of data and details of methods of assessment (measurement). Describe comparability of assessment methods if there is more than one group                                                                                                                                                                                                                                                                                   | 8-11  |
| Bias                      | 9       | Describe any efforts to address potential sources of bias                                                                                                                                                                                                                                                                                                                                                                                                              | 9     |
| Study size                | 10      | Explain how the study size was arrived at                                                                                                                                                                                                                                                                                                                                                                                                                              | 9-10  |
| Quantitative variables    | 11      | Explain how quantitative variables were handled in the analyses. If applicable, describe which groupings were chosen and why                                                                                                                                                                                                                                                                                                                                           | 10-11 |
| Statistical methods       | 12      | (a) Describe all statistical methods, including those used to control for confounding                                                                                                                                                                                                                                                                                                                                                                                  | 11-12 |
|                           |         | (b) Describe any methods used to examine subgroups and interactions                                                                                                                                                                                                                                                                                                                                                                                                    | N/A   |
|                           |         | (c) Explain how missing data were addressed                                                                                                                                                                                                                                                                                                                                                                                                                            | 11-12 |
|                           |         | (d) <i>Cohort study</i> —If applicable, explain how loss to follow-up was addressed<br><i>Case-control study</i> —If applicable, explain how matching of cases and controls was addressed<br><i>Cross-sectional study</i> —If applicable, describe analytical methods taking account of sampling strategy                                                                                                                                                              | 9-10  |

1  
2  
3  
4  
5  
6  
7  
8  
9  
10  
11  
12  
13  
14  
15  
16  
17  
18  
19  
20  
21  
22  
23  
24  
25  
26  
27  
28  
29  
30  
31  
32  
33  
34  
35  
36  
37  
38  
39  
40  
41  
42  
43  
44  
45  
46  
47  
48  
49  
50  
51  
52  
53  
54  
55  
56  
57  
58  
59  
60

(e) Describe any sensitivity analyses

N/A

Continued on next page

For peer review only

| <b>Results</b>           |     |                                                                                                                                                                                                              |            |
|--------------------------|-----|--------------------------------------------------------------------------------------------------------------------------------------------------------------------------------------------------------------|------------|
| Participants             | 13* | (a) Report numbers of individuals at each stage of study—eg numbers potentially eligible, examined for eligibility, confirmed eligible, included in the study, completing follow-up, and analysed            | 9-10       |
|                          |     | (b) Give reasons for non-participation at each stage                                                                                                                                                         | N/A        |
|                          |     | (c) Consider use of a flow diagram                                                                                                                                                                           | Appendix 1 |
| Descriptive data         | 14* | (a) Give characteristics of study participants (eg demographic, clinical, social) and information on exposures and potential confounders                                                                     | 13         |
|                          |     | (b) Indicate number of participants with missing data for each variable of interest                                                                                                                          | 8          |
|                          |     | (c) <i>Cohort study</i> —Summarise follow-up time (eg, average and total amount)                                                                                                                             | N/A        |
| Outcome data             | 15* | <i>Cohort study</i> —Report numbers of outcome events or summary measures over time                                                                                                                          | N/A        |
|                          |     | <i>Case-control study</i> —Report numbers in each exposure category, or summary measures of exposure                                                                                                         | N/A        |
|                          |     | <i>Cross-sectional study</i> —Report numbers of outcome events or summary measures                                                                                                                           | 8-9, 11    |
| Main results             | 16  | (a) Give unadjusted estimates and, if applicable, confounder-adjusted estimates and their precision (eg, 95% confidence interval). Make clear which confounders were adjusted for and why they were included | 15-26      |
|                          |     | (b) Report category boundaries when continuous variables were categorized                                                                                                                                    | N/A        |
|                          |     | (c) If relevant, consider translating estimates of relative risk into absolute risk for a meaningful time period                                                                                             | N/A        |
| Other analyses           | 17  | Report other analyses done—eg analyses of subgroups and interactions, and sensitivity analyses                                                                                                               | N/A        |
| <b>Discussion</b>        |     |                                                                                                                                                                                                              |            |
| Key results              | 18  | Summarise key results with reference to study objectives                                                                                                                                                     | 26-30      |
| Limitations              | 19  | Discuss limitations of the study, taking into account sources of potential bias or imprecision. Discuss both direction and magnitude of any potential bias                                                   | 30         |
| Interpretation           | 20  | Give a cautious overall interpretation of results considering objectives, limitations, multiplicity of analyses, results from similar studies, and other relevant evidence                                   | 30         |
| Generalisability         | 21  | Discuss the generalisability (external validity) of the study results                                                                                                                                        | 30         |
| <b>Other information</b> |     |                                                                                                                                                                                                              |            |
| Funding                  | 22  | Give the source of funding and the role of the funders for the present study and, if applicable, for the original study on which the present article is based                                                | 31         |

\*Give information separately for cases and controls in case-control studies and, if applicable, for exposed and unexposed groups in cohort and cross-sectional studies.

**Note:** An Explanation and Elaboration article discusses each checklist item and gives methodological background and published examples of transparent reporting. The STROBE checklist is best used in conjunction with this article (freely available on the Web sites of PLoS Medicine at <http://www.plosmedicine.org/>, Annals of Internal Medicine at <http://www.annals.org/>, and Epidemiology at <http://www.epidem.com/>). Information on the STROBE Initiative is available at [www.strobe-statement.org](http://www.strobe-statement.org).
