# Supplementary figures and images for: A population-based case-control study of hospitalisation due to head injuries among bicyclists and motorcyclists in Taiwan
Source: PubMed Central journal article supplement — BMJ Open. 2017 Nov 8;7(11):e018574. doi: 10.1136/bmjopen-2017-018574 (PMC5695412; doi:10.1136/bmjopen-2017-018574), 2017-11-08

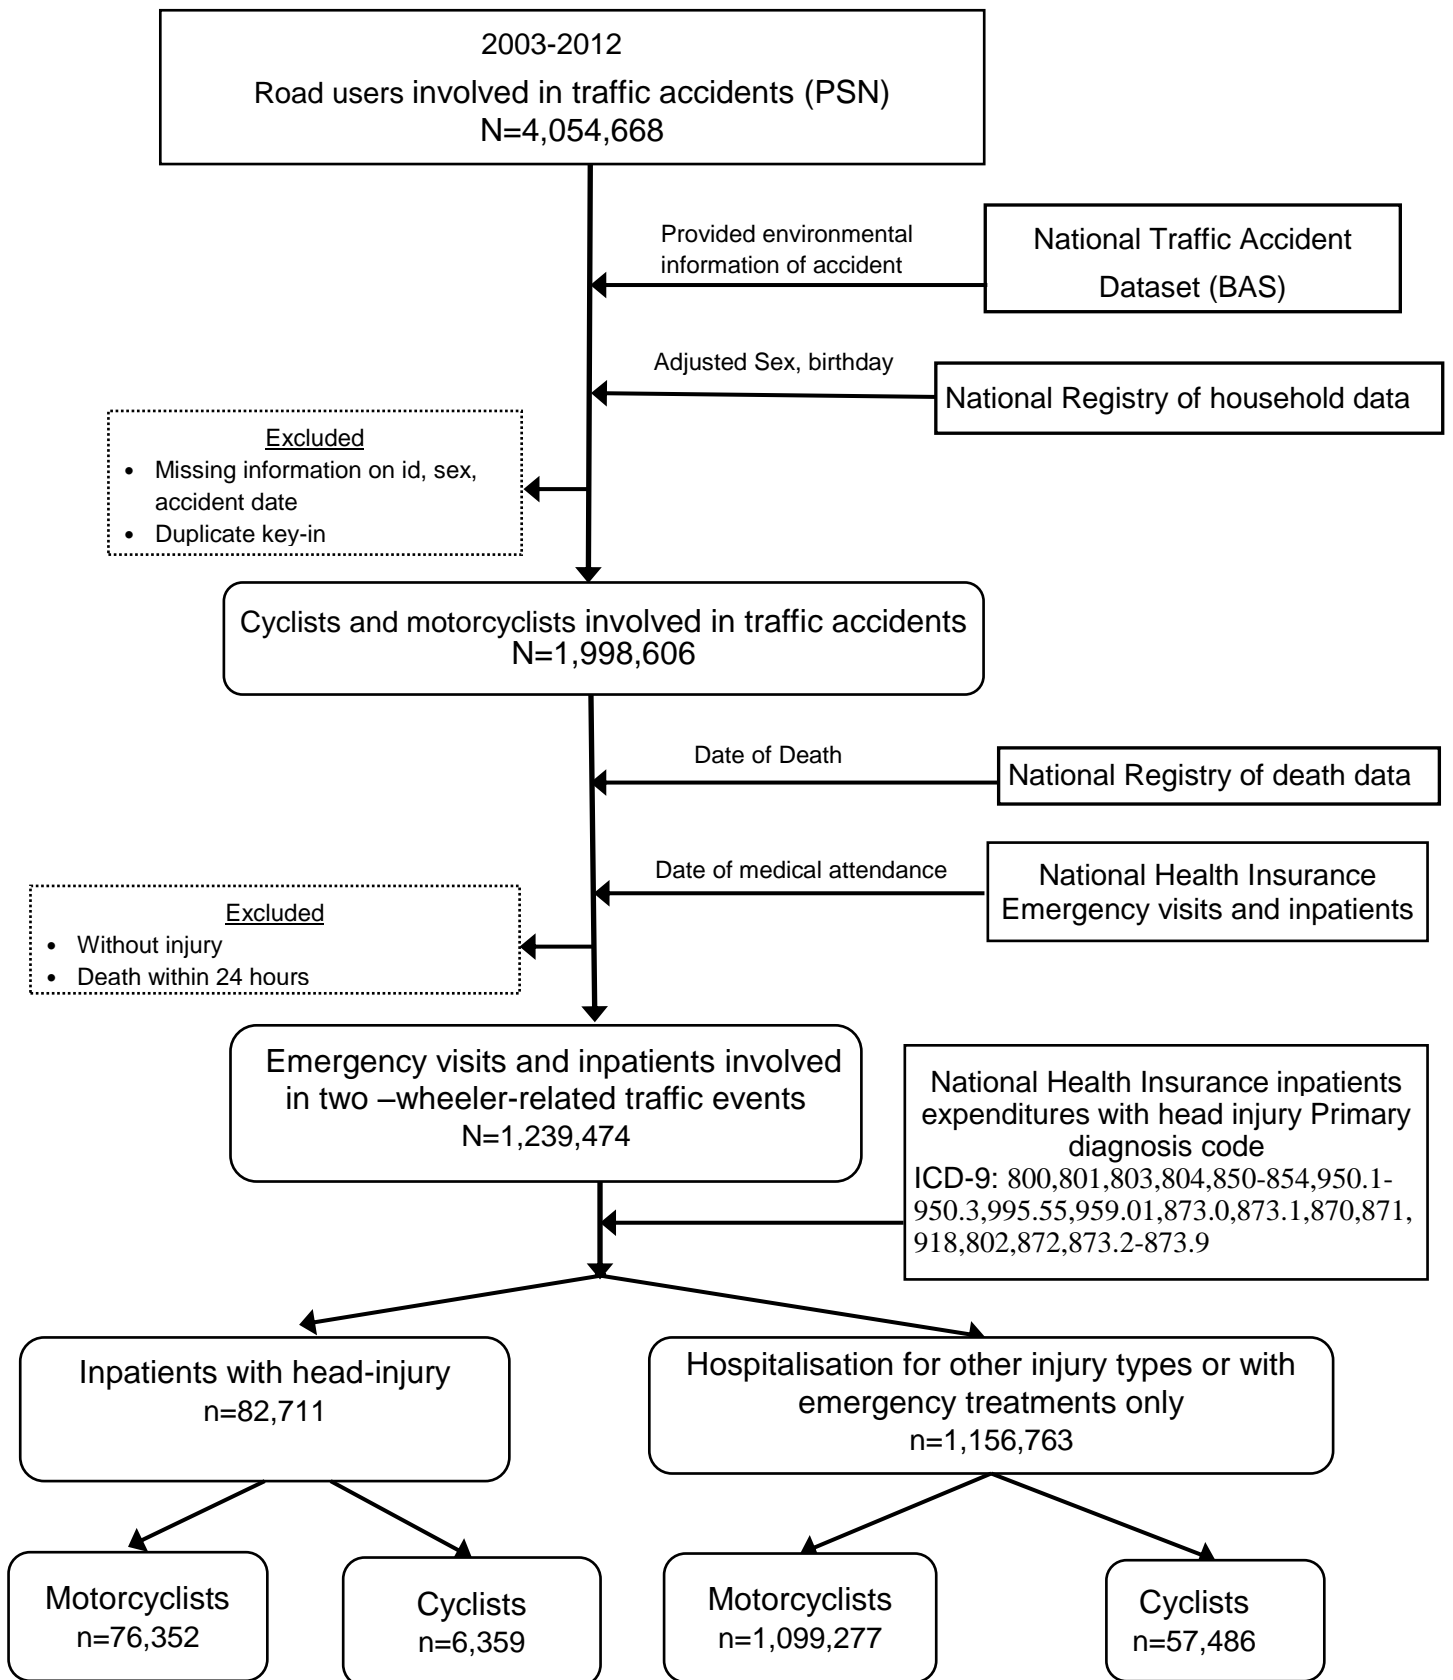

Appendix 1. Study flow diagram

Supplement: bmjopen-2017-018574supp001.pdf [file bmjopen-2017-018574supp001.pdf]
